# Supplementary material for: Facile Synthesis of Tricyclic 1,2,4-Oxadiazolines-Fused Tetrahydro-Isoquinolines from Oxime Chlorides with 3,4-Dihydroisoquinoline Imines
Source: MDPI journal article supplement (doi:10.3390/molecules27103064), 2022-05-10

# Facile Synthesis of Tricyclic 1,2,4-Oxadiazolines-Fused Tetrahydro-Isoquinolines from Oxime Chlorides with 3,4-Dihydroisoquinoline Imines

Kaikai Wang <sup>1,2</sup>, Yanli Li <sup>3</sup>, Wei Zhang <sup>1</sup>, Rongxiang Chen <sup>1,\*</sup>, Xueji Ma <sup>1,2,\*</sup>, Mingyue Wang <sup>1</sup> and Nan Zhou <sup>1</sup>

<sup>1</sup> School of Pharmacy, Xinxiang University, Xinxiang 453000, China; wangkaikai@xxu.edu.cn (K.W.); xinxiangzhangwei@126.com (W.Z.); wmyoutstanding@163.com (M.W.); zhounan5180708@163.com (N.Z.)

<sup>2</sup> Key Laboratory of Nano-Carbon Modified Film Technology Engineering of Henan Province, Xinxiang 453000, China

<sup>3</sup> Medical College, Xinxiang University, Xinxiang 453000, China; liyanli2005@126.com

\* Correspondence: chenrx@xxu.edu.cn (R.C.); mxj022@163.com (X.M.)

## Supporting Information

### Table of Contents

#### 1. General methods

#### 2. General procedure for synthesis of 1,2,4-oxadiazolo[5,4-*a*]isoquinoline compounds

#### 3. Crystal data and structural refinement for 3j

#### 4. NMR spectra

## 1. General methods

The hydroximoyl chloride **1** [1–3] and isolable 2,4,6-trimethylbenzonitrile oxide **1a'** [4,5] were prepared according to the literature procedures. The cyclic imines **2** were prepared according to the literature procedures [6–8].

1. Schäfer, R.J.B.; Monaco, M.R.; Li, M.; Tirla, A.; Rivera-Fuentes, P.; Wennemers, H. The Bioorthogonal Isonitrile–Chlorooxime Ligation. *J. Am. Chem. Soc.* **2019**, *141*, 18644–18648.
2. Ong, M.J.H.; Hewitt, R.J. Synthesis of 1,4,2-Oxathiazoles via Norrish Type II Generation of Thiocarbonyls. *ChemistrySelect* **2019**, *4*, 10532–10535.
3. Vo, Q.V.; Trenerry, C.; Rochfort, S.; Wadeson, J.; Leyton, C.; Hughes, A.B. Synthesis and anti-inflammatory activity of aromatic glucosinolates. *Bioorg. Med. Chem.* **2013**, *21*, 5945–5954.
4. Zhao, G.; Liang, L.; Wen, C.H.E.; Tong, R. In Situ Generation of Nitrile Oxides from NaCl–Oxone Oxidation of Various Ald-oximes and Their 1,3-Dipolar Cycloaddition. *Org. Lett.* **2019**, *21*, 315–319.
5. Altintas, O.; Glassner, M.; Rodriguez-Emmenegger, C.; Welle, A.; Trouillet, V.; Barner-Kowollik, C. Macromolecular Surface Design: Photopatterning of Functional Stable Nitrile Oxides. *Angew. Chem. Int. Ed.* **2015**, *54*, 5777–5783.
6. Mbere, J.M.; Bremner, J.B.; Skelton, B.W.; White, A.H. Synthesis of new benzo[*b*]thieno fused ring systems via transition metal-mediated cyclisations. *Tetrahedron* **2011**, *67*, 6895–6900.
7. Jakubec, P.; Helliwell, M.; Dixon, D.J. Cyclic Imine Nitro-Mannich/Lactamization Cascades: A Direct Stereoselective Synthesis of Multicyclic Piperidinone Derivatives. *Org. Lett.* **2008**, *10*, 4267–4270.
8. Elliott, M.C.; Williams, E. Synthesis and reactions of partially reduced bisoquinolines. *Org. Biomol. Chem.* **2003**, *1*, 3038–3047.

## 2. General procedure for synthesis of 1,2,4-oxadiazolo[5,4-*a*]isoquinoline compounds

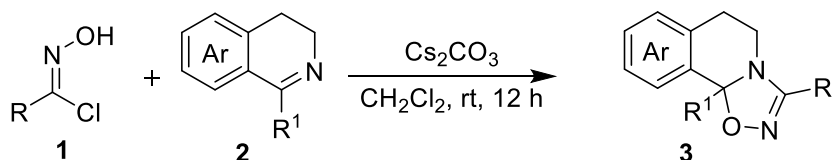

Cs<sub>2</sub>CO<sub>3</sub> (0.22 mmol) was added to a solution of oxime chlorides **1** (0.22 mmol), cyclic imines **2** (0.2 mmol) in CH<sub>2</sub>Cl<sub>2</sub> (1 mL). The solution was stirred at rt for 12 h. After completion, product **3** was obtained by flash chromatography on silica gel (petroleum ether/ethyl acetate = 15:1 to 10:1).

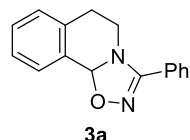

**3-Phenyl-6,10b-dihydro-5H-[1,2,4]oxadiazolo[5,4-*a*]isoquinoline 3a**, 47.5 mg, 95% yield, white solid; <sup>1</sup>H NMR (400 MHz, CDCl<sub>3</sub>) δ 7.70 (d, *J* = 7.6 Hz, 2H), 7.50–7.43 (m, 4H), 7.32–7.24 (m, 2H), 7.12 (d, *J* = 5.6 Hz, 1H), 6.51 (s, 1H), 3.48 (dt, *J* = 12.8, 4.4 Hz, 1H), 3.37–3.31 (m, 1H), 2.78 (ddd, *J* = 15.2, 10.0, 4.4 Hz, 1H), 2.63 (dt, *J* = 15.6, 3.6 Hz, 1H) ppm. <sup>13</sup>C NMR (100 MHz, CDCl<sub>3</sub>) δ 159.6, 135.8, 131.7, 130.9, 128.9, 128.4, 128.3, 128.2, 127.2, 125.7, 92.0, 43.4, 28.2 ppm. ESI-HRMS: C<sub>16</sub>H<sub>14</sub>N<sub>2</sub>O+H<sup>+</sup> 251.1179, found 251.1176.

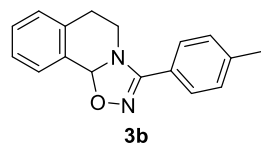

**3-(*p*-Tolyl)-6,10b-dihydro-5H-[1,2,4]oxadiazolo[5,4-*a*]isoquinoline 3b**, 48.0 mg, 91% yield, white solid; <sup>1</sup>H NMR (400 MHz, CDCl<sub>3</sub>) δ 7.59 (d, *J* = 8.0 Hz, 2H), 7.45 (d, *J* = 5.6 Hz, 1H), 7.34–7.31 (m, 2H), 7.27 (d, *J* = 8.4 Hz, 2H), 7.13 (d, *J* = 5.6 Hz, 1H), 6.51 (s, 1H), 3.49 (dt, *J* = 12.8, 4.4 Hz, 1H), 3.37–3.30 (m, 1H), 2.78 (ddd, *J* = 15.2, 10.4, 4.4 Hz, 1H), 2.63 (d, *J* = 15.6 Hz, 1H), 2.41 (s, 3H) ppm. <sup>13</sup>C NMR (100 MHz, CDCl<sub>3</sub>) δ 159.6, 141.2, 135.9, 131.8, 129.6, 128.9, 128.4, 128.3, 128.2, 127.2, 122.7, 91.8, 43.4, 28.3, 21.5 ppm. ESI-HRMS: C<sub>17</sub>H<sub>16</sub>N<sub>2</sub>O+H<sup>+</sup> 265.1335, found 265.1332.

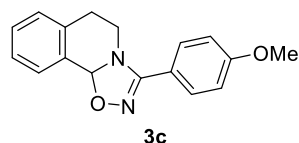

**3-(4-Methoxyphenyl)-6,10b-dihydro-5H-[1,2,4]oxadiazolo[5,4-*a*]isoquinoline 3c**, 50.4 mg, 90% yield, white solid; <sup>1</sup>H NMR (400 MHz, CDCl<sub>3</sub>) δ 7.65 (d, *J* = 8.4 Hz, 2H), 7.46–7.44 (m, 1H), 7.34–7.26 (m, 2H), 7.14–7.12 (m, 1H), 6.97 (d, *J* = 8.4 Hz, 2H), 6.46 (s, 1H),

3.85 (s, 3H), 3.46 (dt,  $J = 12.8, 4.4$  Hz, 1H), 3.36–3.29 (m, 1H), 2.83–2.75 (m, 1H), 2.65 (dt,  $J = 15.6, 3.6$  Hz, 1H) ppm.  $^{13}\text{C}$  NMR (100 MHz,  $\text{CDCl}_3$ )  $\delta$  161.7, 159.5, 136.0, 131.7, 129.9, 128.9, 128.34, 128.32, 127.1, 117.9, 114.4, 91.7, 55.4, 43.6, 28.4 ppm. ESI-HRMS:  $\text{C}_{17}\text{H}_{16}\text{N}_2\text{O}_2 + \text{H}^+$  281.1285, found 281.1281.

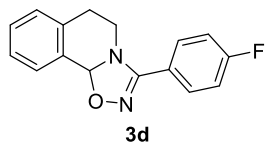

**3-(4-Fluorophenyl)-6,10b-dihydro-5H-[1,2,4]oxadiazolo[5,4-a]isoquinoline 3d**, 50.9 mg, 95% yield, white solid;  $^1\text{H}$  NMR (400 MHz,  $\text{CDCl}_3$ )  $\delta$  7.73–7.69 (m, 2H), 7.45 (d,  $J = 4.4$  Hz, 1H), 7.34–7.32 (m, 2H), 7.18–7.14 (m, 3H), 6.50 (s, 1H), 3.47–3.30 (m, 2H), 2.82–2.64 (m, 2H) ppm.  $^{13}\text{C}$  NMR (100 MHz,  $\text{CDCl}_3$ )  $\delta$  164.2 (d,  $J = 250.0$  Hz), 158.9, 135.8, 131.4, 130.36 (d,  $J = 8.6$  Hz), 129.0, 128.4, 128.3, 127.2, 121.8 (d,  $J = 3.3$  Hz), 116.2 (d,  $J = 21.8$  Hz), 92.0, 43.5, 28.3 ppm. ESI-HRMS:  $\text{C}_{16}\text{H}_{13}\text{FN}_2\text{O} + \text{H}^+$  269.1085, found 269.1083.

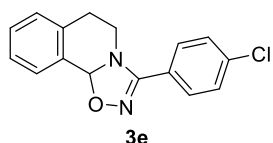

**3-(4-Chlorophenyl)-6,10b-dihydro-5H-[1,2,4]oxadiazolo[5,4-a]isoquinoline 3e**, 53.4 mg, 94% yield, white solid;  $^1\text{H}$  NMR (400 MHz,  $\text{CDCl}_3$ )  $\delta$  7.66 (d,  $J = 8.4$  Hz, 2H), 7.44 (d,  $J = 7.6$  Hz, 3H), 7.35–7.30 (m, 2H), 7.15 (d,  $J = 4.8$  Hz, 1H), 6.50 (s, 1H), 3.43 (dt,  $J = 12.8, 4.4$  Hz, 1H), 3.37–3.30 (m, 1H), 2.79 (ddd,  $J = 15.2, 10.0, 4.4$  Hz, 1H), 2.66 (dt,  $J = 15.6, 3.6$  Hz, 1H) ppm.  $^{13}\text{C}$  NMR (100 MHz,  $\text{CDCl}_3$ )  $\delta$  158.9, 137.0, 135.8, 131.3, 129.5, 129.3, 129.0, 128.4, 128.3, 127.2, 124.2, 92.1, 43.5, 28.3 ppm. ESI-HRMS:  $\text{C}_{16}\text{H}_{13}\text{ClN}_2\text{O} + \text{H}^+$  285.0789, found 285.0786.

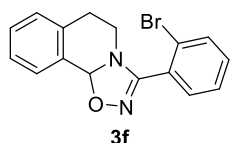

**3-(2-Bromophenyl)-6,10b-dihydro-5H-[1,2,4]oxadiazolo[5,4-a]isoquinoline 3f**, 60.4 mg, 92% yield, white solid;  $^1\text{H}$  NMR (400 MHz,  $\text{CDCl}_3$ )  $\delta$  7.69 (d,  $J = 8.0$  Hz, 1H), 7.50 (dd,  $J = 7.6, 1.6$  Hz, 1H), 7.45 (d,  $J = 6.8$  Hz, 1H), 7.42–7.45 (m, 2H), 7.33–7.28 (m, 2H), 7.10 (d,  $J = 6.8$  Hz, 1H), 6.72 (s, 1H), 3.40–3.28 (m, 2H), 2.90–2.81 (m, 1H), 2.58 (d,  $J = 16.0$  Hz, 1H) ppm.  $^{13}\text{C}$  NMR (100 MHz,  $\text{CDCl}_3$ )  $\delta$  157.4, 134.9, 133.8, 133.0, 131.97, 131.91, 128.7, 128.6, 127.6, 127.3, 126.8, 122.9, 91.6, 41.8, 27.9 ppm. ESI-HRMS:  $\text{C}_{16}\text{H}_{13}\text{BrN}_2\text{O} + \text{H}^+$  329.0284 ( $^{79}\text{Br}$ ) and 331.0264 ( $^{81}\text{Br}$ ), found 329.0283 and 331.0261.

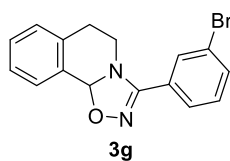

**3-(3-Bromophenyl)-6,10b-dihydro-5H-[1,2,4]oxadiazolo[5,4-a]isoquinoline 3g**, 61.7 mg, 94% yield, white solid;  $^1\text{H}$  NMR (400 MHz,  $\text{CDCl}_3$ )  $\delta$  7.87 (s, 1H), 7.66–7.61 (m, 2H), 7.46–7.44 (m, 1H), 7.36–7.31 (m, 3H), 7.16–7.14 (m, 1H), 6.51 (s, 1H), 3.45 (dt,  $J = 12.8, 4.4$  Hz, 1H), 3.38–3.31 (m, 1H), 2.80 (ddd,  $J = 15.2, 10.0, 4.4$  Hz, 1H), 2.67 (dt,  $J = 16.0, 3.6$  Hz, 1H) ppm.  $^{13}\text{C}$  NMR (100 MHz,  $\text{CDCl}_3$ )  $\delta$  158.5, 135.7, 133.9, 131.2, 131.1, 130.5, 129.1, 128.4, 128.3, 127.7, 127.3, 126.8, 122.9, 92.2, 43.6, 28.3 ppm. ESI-HRMS:  $\text{C}_{16}\text{H}_{13}\text{BrN}_2\text{O} + \text{H}^+$  329.0284 ( $^{79}\text{Br}$ ) and 331.0264 ( $^{81}\text{Br}$ ), found 329.0282 and 331.0260.

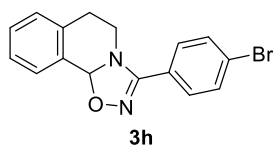

**3-(4-Bromophenyl)-6,10b-dihydro-5H-[1,2,4]oxadiazolo[5,4-a]isoquinoline 3h**, 62.3mg, 95% yield, white solid;  $^1\text{H}$  NMR (400 MHz,  $\text{CDCl}_3$ )  $\delta$  7.61–7.57 (m, 4H), 7.44 (d,  $J = 4.4$  Hz, 1H), 7.32 (dd,  $J = 4.4, 2.8$  Hz, 2H), 7.14 (d,  $J = 4.4$  Hz, 1H), 6.49 (s, 1H), 3.45–3.39 (m, 1H), 3.36–3.30 (m, 1H), 2.82–2.74 (m, 1H), 2.66 (d,  $J = 16.0$  Hz, 1H) ppm.  $^{13}\text{C}$  NMR (100 MHz,  $\text{CDCl}_3$ )  $\delta$  158.9, 135.7, 132.2, 131.3, 129.7, 129.1, 128.4, 128.3, 127.2, 125.3, 124.7, 92.2, 43.6, 28.3 ppm. ESI-HRMS:  $\text{C}_{16}\text{H}_{13}\text{BrN}_2\text{O} + \text{H}^+$  329.0284 ( $^{79}\text{Br}$ ) and 331.0264 ( $^{81}\text{Br}$ ), found 329.0281 and 331.0260.

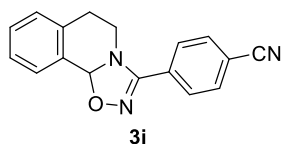

**4-(6,10b-Dihydro-5H-[1,2,4]oxadiazolo[5,4-a]isoquinolin-3-yl)benzonitrile 3i**, 52.8 mg,

96% yield, white solid;  $^1\text{H}$  NMR (400 MHz,  $\text{CDCl}_3$ )  $\delta$  7.85 (d,  $J$  = 8.0 Hz, 2H), 7.77 (d,  $J$  = 8.4 Hz, 2H), 7.47–7.45 (m, 1H), 7.35 (dd,  $J$  = 5.6, 3.6 Hz, 2H), 7.18–7.15 (m, 1H), 6.53 (s, 1H), 3.43–3.33 (m, 2H), 2.84–2.67 (m, 2H) ppm.  $^{13}\text{C}$  NMR (100 MHz,  $\text{CDCl}_3$ )  $\delta$  158.5,

135.6, 132.7, 130.8, 130.2, 129.3, 128.7, 128.4, 128.3, 127.4, 118.1, 114.4, 92.7, 43.7, 28.3 ppm. ESI-HRMS:  $\text{C}_{17}\text{H}_{13}\text{N}_3\text{O}+\text{H}^+$  276.1131, found 276.1130.

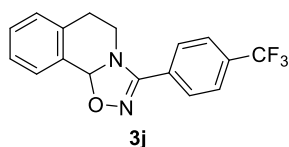

**3-(4-(Trifluoromethyl)phenyl)-6,10b-dihydro-5H-[1,2,4]oxadiazolo[5,4-a]isoquinoline 3j**, 61.1 mg, 96% yield, white solid;  $^1\text{H}$  NMR (400 MHz,  $\text{CDCl}_3$ )  $\delta$  7.85 (d,  $J$  = 8.4 Hz, 2H),

7.73 (d,  $J$  = 8.0 Hz, 2H), 7.47–7.45 (m, 1H), 7.36–7.31 (m, 2H), 7.16–7.14 (m, 1H), 6.54 (s, 1H), 3.46–3.33 (m, 2H), 2.79 (ddd,  $J$  = 15.2, 9.6, 4.4 Hz, 1H), 2.68 (dt,  $J$  = 16.0, 4.0 Hz, 1H) ppm.  $^{13}\text{C}$  NMR (100

MHz,  $\text{CDCl}_3$ )  $\delta$  158.7, 135.7, 132.7 (q,  $J$  = 32.5 Hz), 131.2, 129.4, 129.2, 128.6, 128.4, 128.3, 127.3, 125.9 (q,  $J$  = 3.7 Hz), 123.7 (q,  $J$  = 268.8 Hz), 92.5, 43.6, 28.3 ppm. ESI-HRMS:  $\text{C}_{17}\text{H}_{13}\text{F}_3\text{N}_2\text{O}+\text{H}^+$  319.1053, found 319.1051.

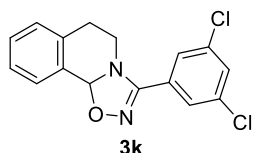

**3-(3,5-Dichlorophenyl)-6,10b-dihydro-5H-[1,2,4]oxadiazolo[5,4-a]isoquinoline 3k**, 59.8

mg, 94% yield, white solid;  $^1\text{H}$  NMR (400 MHz,  $\text{CDCl}_3$ )  $\delta$  7.61 (s, 2H), 7.48 (s, 1H), 7.44 (d,  $J$  = 4.4 Hz, 1H), 7.33 (dd,  $J$  = 7.2, 4.0 Hz, 2H), 7.16 (d,  $J$  = 3.6 Hz, 1H), 6.49 (s, 1H), 3.43–3.31 (m, 2H), 2.84–2.77 (m, 1H), 2.74–2.69 (m, 1H) ppm.  $^{13}\text{C}$  NMR (100 MHz,  $\text{CDCl}_3$ )  $\delta$  157.9,

135.73, 135.67, 130.84, 130.82, 129.2, 128.7, 128.4, 128.3, 127.3, 126.5, 92.6, 43.7, 28.3 ppm. ESI-HRMS:  $\text{C}_{16}\text{H}_{12}\text{Cl}_2\text{N}_2\text{O}+\text{H}^+$  319.0399, found 319.0397.

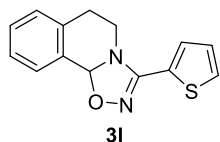

**3-(Thiophen-2-yl)-6,10b-dihydro-5H-[1,2,4]oxadiazolo[5,4-a]isoquinoline 3l**, 46.1 mg, 90%

yield, white solid;  $^1\text{H}$  NMR (400 MHz,  $\text{CDCl}_3$ )  $\delta$  7.45–7.43 (m, 1H), 7.33 (dd,  $J$  = 8.4, 4.0 Hz, 2H), 7.26 (d,  $J$  = 4.4 Hz, 2H), 7.17–7.15 (m, 1H), 6.96 (d,  $J$  = 3.6 Hz, 1H), 6.42 (s, 1H), 3.60–

3.55 (m, 1H), 3.42–3.35 (m, 1H), 2.90–2.83 (m, 1H), 2.76–2.70 (m, 1H) ppm.  $^{13}\text{C}$  NMR (100 MHz,  $\text{CDCl}_3$ )  $\delta$  154.5, 135.8, 133.9, 130.8, 129.2, 128.7, 128.3, 127.2, 126.9, 125.6, 92.2, 44.1, 28.4 ppm. ESI-HRMS:  $\text{C}_{14}\text{H}_{12}\text{N}_2\text{OS}+\text{H}^+$  257.0743, found 257.0738.

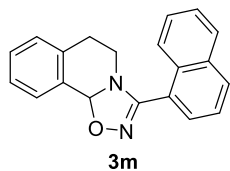

**3-(Naphthalen-1-yl)-6,10b-dihydro-5H-[1,2,4]oxadiazolo[5,4-a]isoquinoline 3m**, 54.6 mg,

91% yield, white solid;  $^1\text{H}$  NMR (400 MHz,  $\text{CDCl}_3$ )  $\delta$  8.39 (d,  $J$  = 8.8 Hz, 1H), 7.98 (d,  $J$  = 8.0 Hz, 1H), 7.91–7.89 (m, 1H), 7.73 (d,  $J$  = 6.8 Hz, 1H), 7.56–7.52 (m, 4H), 7.37–7.29 (m, 2H), 7.07 (d,  $J$  = 7.2 Hz, 1H), 6.79 (s, 1H), 3.32–3.28 (m, 2H), 2.78–2.70 (m, 1H), 2.49 (d,  $J$  = 16.0

Hz, 1H) ppm.  $^{13}\text{C}$  NMR (100 MHz,  $\text{CDCl}_3$ )  $\delta$  158.0, 135.1, 133.6, 133.1, 131.24, 131.19, 128.7, 128.6, 128.53, 128.46, 127.8, 127.34, 127.32, 126.5, 125.2, 122.5, 91.6, 42.3, 28.0 ppm. ESI-HRMS:  $\text{C}_{20}\text{H}_{16}\text{N}_2\text{O}+\text{H}^+$  301.1335, found 301.1332.

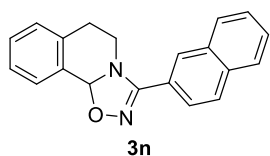

**3-(Naphthalen-2-yl)-6,10b-dihydro-5H-[1,2,4]oxadiazolo[5,4-a]isoquinoline 3n**, 54.0 mg,

90% yield, white solid;  $^1\text{H}$  NMR (400 MHz,  $\text{CDCl}_3$ )  $\delta$  8.21 (s, 1H), 7.93–7.87 (m, 3H), 7.79 (d,  $J$  = 8.4 Hz, 1H), 7.58–7.52 (m, 3H), 7.36–7.30 (m, 2H), 7.14 (d,  $J$  = 6.4 Hz, 1H), 6.56 (s,

1H), 3.55 (dt,  $J = 12.8, 4.4$  Hz, 1H), 3.44–3.38 (m, 1H), 2.85–2.78 (m, 1H), 2.66 (d,  $J = 15.6$  Hz, 1H) ppm.  $^{13}\text{C}$  NMR (100 MHz,  $\text{CDCl}_3$ )  $\delta$  159.8, 135.9, 134.4, 132.9, 131.5, 129.0, 128.8, 128.54, 128.46, 128.4, 128.3, 127.8, 127.5, 127.2, 126.8, 124.8, 123.0, 92.1, 43.7, 28.3 ppm. ESI-HRMS:  $\text{C}_{20}\text{H}_{16}\text{N}_2\text{O}+\text{H}^+$  301.1335, found 301.1334.

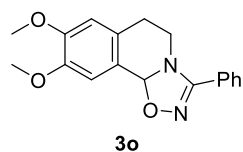

**8,9-Dimethoxy-3-phenyl-6,10b-dihydro-5H-[1,2,4]oxadiazolo[5,4-a]isoquinoline 3o**, 58.9

mg, 95% yield, white solid;  $^1\text{H}$  NMR (400 MHz,  $\text{CDCl}_3$ )  $\delta$  7.67 (d,  $J = 6.4$  Hz, 2H), 7.46 (d,  $J = 6.8$  Hz, 3H), 6.92 (s, 1H), 6.59 (s, 1H), 6.50 (s, 1H), 3.92 (s, 3H), 3.86 (s, 3H), 3.51 (d,  $J = 13.2$  Hz, 1H), 3.34 (t,  $J = 8.8$  Hz, 1H), 2.73–2.66 (m, 1H), 2.53 (d,  $J = 15.6$  Hz, 1H) ppm.  $^{13}\text{C}$  NMR (100 MHz,  $\text{CDCl}_3$ )  $\delta$  159.4, 149.3, 148.2, 130.8, 128.9, 128.2, 128.0, 125.6, 123.9, 111.0, 110.3, 91.9, 56.0, 55.9, 43.2, 27.6 ppm. ESI-HRMS:  $\text{C}_{18}\text{H}_{18}\text{N}_2\text{O}_3+\text{H}^+$  311.1390, found 311.1386.

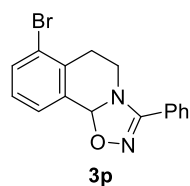

**7-Bromo-3-phenyl-6,10b-dihydro-5H-[1,2,4]oxadiazolo[5,4-a]isoquinoline 3p**, 59.0 mg, 90%

yield, white solid;  $^1\text{H}$  NMR (400 MHz,  $\text{CDCl}_3$ )  $\delta$  7.66 (d,  $J = 7.2$  Hz, 2H), 7.57 (d,  $J = 7.6$  Hz, 1H), 7.52–7.45 (m, 3H), 7.42 (d,  $J = 7.6$  Hz, 1H), 7.21 (t,  $J = 8.0$  Hz, 1H), 6.52 (s, 1H), 3.59 (dt,  $J = 13.6, 4.4$  Hz, 1H), 3.39–3.33 (m, 1H), 2.80 (d,  $J = 16.8$  Hz, 1H), 2.67–2.59 (m, 1H) ppm.  $^{13}\text{C}$  NMR (100 MHz,  $\text{CDCl}_3$ )  $\delta$  159.1, 135.2, 134.9, 132.8, 131.0, 129.0, 128.4, 128.2, 127.2, 125.2, 124.4, 91.6, 42.5, 27.9 ppm. ESI-HRMS:  $\text{C}_{16}\text{H}_{13}\text{BrN}_2\text{O}+\text{H}^+$  329.0284 ( $^{79}\text{Br}$ ) and 331.0264 ( $^{81}\text{Br}$ ), found 329.0281 and 331.0260.

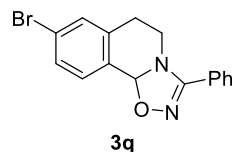

**8-Bromo-3-phenyl-6,10b-dihydro-5H-[1,2,4]oxadiazolo[5,4-a]isoquinoline 3q**, 59.7 mg, 91%

yield, white solid;  $^1\text{H}$  NMR (400 MHz,  $\text{CDCl}_3$ )  $\delta$  7.69–7.67 (m, 2H), 7.53–7.45 (m, 4H), 7.33–7.30 (m, 2H), 6.48 (s, 1H), 3.49 (dt,  $J = 13.2, 4.4$  Hz, 1H), 3.37–3.30 (m, 1H), 2.75 (ddd,  $J = 15.6, 10.4, 4.4$  Hz, 1H), 2.60 (dt,  $J = 15.6, 3.6$  Hz, 1H) ppm.  $^{13}\text{C}$  NMR (100 MHz,  $\text{CDCl}_3$ )  $\delta$  159.5, 138.0, 131.3, 131.0, 130.9, 130.4, 129.8, 129.0, 128.2, 125.3, 123.0, 91.4, 43.0, 27.9 ppm. ESI-HRMS:  $\text{C}_{16}\text{H}_{13}\text{BrN}_2\text{O}+\text{H}^+$  329.0284 ( $^{79}\text{Br}$ ) and 331.0264 ( $^{81}\text{Br}$ ), found 329.0280 and 331.0258.

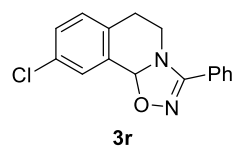

**9-Chloro-3-phenyl-6,10b-dihydro-5H-[1,2,4]oxadiazolo[5,4-a]isoquinoline 3r**, 50.0 mg, 88%

yield, white solid;  $^1\text{H}$  NMR (400 MHz,  $\text{CDCl}_3$ )  $\delta$  7.68 (d,  $J = 7.6$  Hz, 2H), 7.52–7.45 (m, 4H), 7.29–7.26 (m, 1H), 7.06 (d,  $J = 8.0$  Hz, 1H), 6.48 (s, 1H), 3.51 (dt,  $J = 13.2, 4.4$  Hz, 1H), 3.39–3.32 (m, 1H), 2.72 (ddd,  $J = 15.2, 10.0, 4.4$  Hz, 1H), 2.60 (dt,  $J = 15.2, 3.6$  Hz, 1H) ppm.  $^{13}\text{C}$  NMR (100 MHz,  $\text{CDCl}_3$ )  $\delta$  159.4, 134.0, 133.8, 132.9, 131.0, 129.8, 129.03, 129.0, 128.3, 128.1, 125.4, 91.3, 43.1, 27.6 ppm. ESI-HRMS:  $\text{C}_{16}\text{H}_{13}\text{ClN}_2\text{O}+\text{H}^+$  285.0789, found 285.0786.

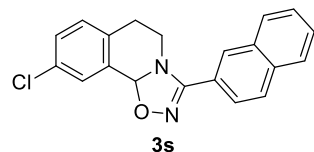

**9-Chloro-3-(naphthalen-2-yl)-6,10b-dihydro-5H-[1,2,4]oxadiazolo[5,4-a]isoquinoline 3s**, 60.8 mg, 91% yield, white solid;  $^1\text{H}$  NMR (400 MHz,  $\text{CDCl}_3$ )  $\delta$  8.18 (s, 1H), 7.93–

7.87 (m, 3H), 7.75 (d,  $J = 8.4$  Hz, 1H), 7.59–7.53 (m, 2H), 7.47 (s, 1H), 7.28 (d,  $J = 8.4$  Hz, 1H), 7.06 (d,  $J = 8.0$  Hz, 1H), 6.51 (s, 1H), 3.56 (dt,  $J = 12.8, 4.4$  Hz, 1H), 3.44–3.37 (m, 1H), 2.74 (ddd,  $J = 15.2, 10.0, 4.4$  Hz, 1H), 2.64–2.59 (m, 1H) ppm.  $^{13}\text{C}$  NMR (100 MHz,  $\text{CDCl}_3$ )  $\delta$  159.6, 134.4, 134.1, 133.6, 132.9, 132.8, 129.8, 129.1, 128.9, 128.53, 128.47, 128.1, 127.9, 127.6, 126.9, 124.7, 122.7, 91.5, 43.3, 27.6 ppm. ESI-HRMS:  $\text{C}_{20}\text{H}_{15}\text{ClN}_2\text{O}+\text{H}^+$  335.0946, found 335.0941.

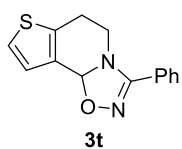

**3-Phenyl-6,9b-dihydro-5H-[1,2,4]oxadiazolo[4,5-a]thieno[3,2-c]pyridine 3t**, 47.6 mg, 93% yield, white solid;  $^1\text{H}$  NMR (400 MHz,  $\text{CDCl}_3$ )  $\delta$  7.61 (d,  $J$  = 7.2 Hz, 2H), 7.51–7.44 (m, 3H), 7.19 (d,  $J$  = 5.2 Hz, 1H), 7.07 (d,  $J$  = 5.2 Hz, 1H), 6.63 (s, 1H), 3.69 (dt,  $J$  = 13.6, 3.6 Hz, 1H), 3.47–3.40 (m, 1H), 2.75–2.63 (m, 2H) ppm.  $^{13}\text{C}$  NMR (100 MHz,  $\text{CDCl}_3$ )  $\delta$  158.7, 137.1, 132.2, 130.8, 128.9, 128.2, 125.5, 125.4, 124.1, 90.2, 42.6, 24.0 ppm. ESI-HRMS:  $\text{C}_{14}\text{H}_{12}\text{N}_2\text{OS}+\text{H}^+$  257.0743, found 257.0740.

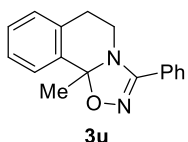

**10b-Methyl-3-phenyl-6,10b-dihydro-5H-[1,2,4]oxadiazolo[5,4-a]isoquinoline 3u**, 50.7 mg, 96% yield, white solid;  $^1\text{H}$  NMR (400 MHz,  $\text{CDCl}_3$ )  $\delta$  7.62 (d,  $J$  = 7.2 Hz, 2H), 7.51 (d,  $J$  = 7.6 Hz, 1H), 7.46–7.41 (m, 3H), 7.30 (t,  $J$  = 7.2 Hz, 1H), 7.25–7.21 (m, 1H), 7.03 (d,  $J$  = 7.6 Hz, 1H), 3.49–3.40 (m, 2H), 2.73–2.56 (m, 2H), 1.89 (s, 3H) ppm.  $^{13}\text{C}$  NMR (100 MHz,  $\text{CDCl}_3$ )  $\delta$  158.4, 137.3, 133.6, 130.6, 128.8, 128.2, 128.1, 127.2, 126.4, 126.0, 97.2, 42.2, 27.95, 27.88 ppm. ESI-HRMS:  $\text{C}_{17}\text{H}_{16}\text{N}_2\text{O}+\text{H}^+$  265.1335, found 265.1333.

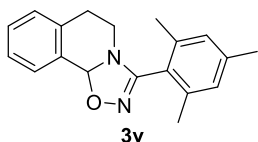

**3-Mesityl-6,10b-dihydro-5H-[1,2,4]oxadiazolo[5,4-a]isoquinoline 3v**, 54.3 mg, 93% yield, white solid;  $^1\text{H}$  NMR (400 MHz,  $\text{CDCl}_3$ )  $\delta$  7.50–7.48 (m, 1H), 7.35–7.27 (m, 2H), 7.10 (d,  $J$  = 7.2 Hz, 1H), 6.93 (s, 2H), 6.65 (s, 1H), 3.30 (ddd,  $J$  = 13.6, 11.2, 4.4 Hz, 1H), 3.17 (ddd,  $J$  = 12.8, 5.6, 2.8 Hz, 1H), 2.78 (ddd,  $J$  = 16.0, 10.8, 5.6 Hz, 1H), 2.60 (dt,  $J$  = 16.0, 3.6 Hz, 1H), 2.37 (s, 3H), 2.31 (s, 3H), 2.21 (s, 3H) ppm.  $^{13}\text{C}$  NMR (100 MHz,  $\text{CDCl}_3$ )  $\delta$  156.3, 139.9, 138.5, 138.1, 134.4, 134.2, 128.8, 128.61, 128.59, 127.3, 127.2, 121.1, 90.1, 40.6, 28.0, 21.2, 20.3, 19.7 ppm. ESI-HRMS:  $\text{C}_{19}\text{H}_{20}\text{N}_2\text{O}+\text{H}^+$  293.1648, found 293.1647.

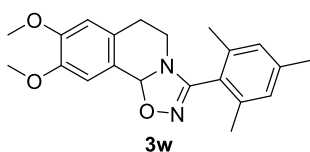

**3-Mesityl-8,9-dimethoxy-6,10b-dihydro-5H-[1,2,4]oxadiazolo[5,4-a]isoquinoline 3w**, 66.9 mg, 95% yield, white solid;  $^1\text{H}$  NMR (400 MHz,  $\text{CDCl}_3$ )  $\delta$  6.95 (s, 1H), 6.92 (s, 2H), 6.61 (s, 1H), 6.54 (s, 1H), 3.92 (s, 3H), 3.86 (s, 3H), 3.29 (ddd,  $J$  = 13.6, 11.2, 4.4 Hz, 1H), 3.18 (ddd,  $J$  = 16.0, 5.6, 2.4 Hz, 1H), 2.69 (ddd,  $J$  = 16.4, 11.6, 6.0 Hz, 1H), 2.47 (dd,  $J$  = 12.8, 3.2 Hz, 1H), 2.35 (s, 3H), 2.30 (s, 3H), 2.22 (s, 3H) ppm.  $^{13}\text{C}$  NMR (100 MHz,  $\text{CDCl}_3$ )  $\delta$  156.2, 149.2, 148.3, 139.8, 138.5, 138.0, 128.9, 128.7, 126.5, 126.3, 121.0, 111.0, 109.4, 90.1, 56.0, 55.9, 40.5, 27.3, 21.2, 20.3, 19.6 ppm. ESI-HRMS:  $\text{C}_{21}\text{H}_{24}\text{N}_2\text{O}_3+\text{H}^+$  353.1860, found 353.1858.

### 3. Crystal data and structural refinement for 3j

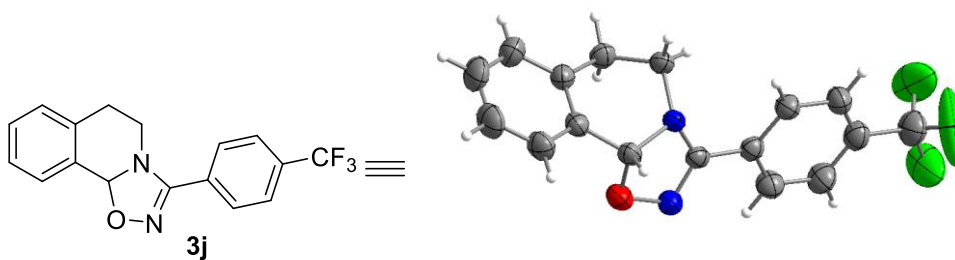

CCDC 2160406

| Identification code                        | <b>3j</b>                                                       |
|--------------------------------------------|-----------------------------------------------------------------|
| Empirical formula                          | C <sub>17</sub> H <sub>13</sub> F <sub>3</sub> N <sub>2</sub> O |
| Formula weight                             | 318.29                                                          |
| Temperature/K                              | 296                                                             |
| Crystal system                             | monoclinic                                                      |
| Space group                                | P 21/c                                                          |
| a/Å                                        | 15.121(3)                                                       |
| b/Å                                        | 8.7521(18)                                                      |
| c/Å                                        | 11.671(2)                                                       |
| α/°                                        | 90                                                              |
| β/°                                        | 110.785(3)                                                      |
| γ/°                                        | 90                                                              |
| Volume/Å <sup>3</sup>                      | 1444.0(5)                                                       |
| Z                                          | 4                                                               |
| ρ <sub>calc</sub> /cm <sup>3</sup>         | 1.464                                                           |
| μ/mm <sup>-1</sup>                         | 0.119                                                           |
| F(000)                                     | 656.0                                                           |
| Crystal size/mm <sup>3</sup>               | 0.26 × 0.25 × 0.2                                               |
| Radiation                                  | MoKα (λ = 0.71073)                                              |
| 2θ range for data collection/°             | 2.737 to 24.998                                                 |
| Index ranges                               | -17 ≤ h ≤ 17, -8 ≤ k ≤ 10, -13 ≤ l ≤ 13                         |
| Reflections collected                      | 7110                                                            |
| Independent reflections                    | 1918 [R <sub>int</sub> = 0.0240]                                |
| Data/restraints/parameters                 | 2535 / 3 / 237                                                  |
| Goodness-of-fit on F <sup>2</sup>          | 0.992                                                           |
| Final R indexes [I ≥ 2σ (I)]               | R <sub>1</sub> = 0.0377, wR <sub>2</sub> = 0.1075               |
| R indices (all data)                       | R <sub>1</sub> = 0.0511, wR <sub>2</sub> = 0.1160               |
| Largest diff. peak and hole/ 1-sigma level | 0.155 / -0.133/0.031                                            |

## S7



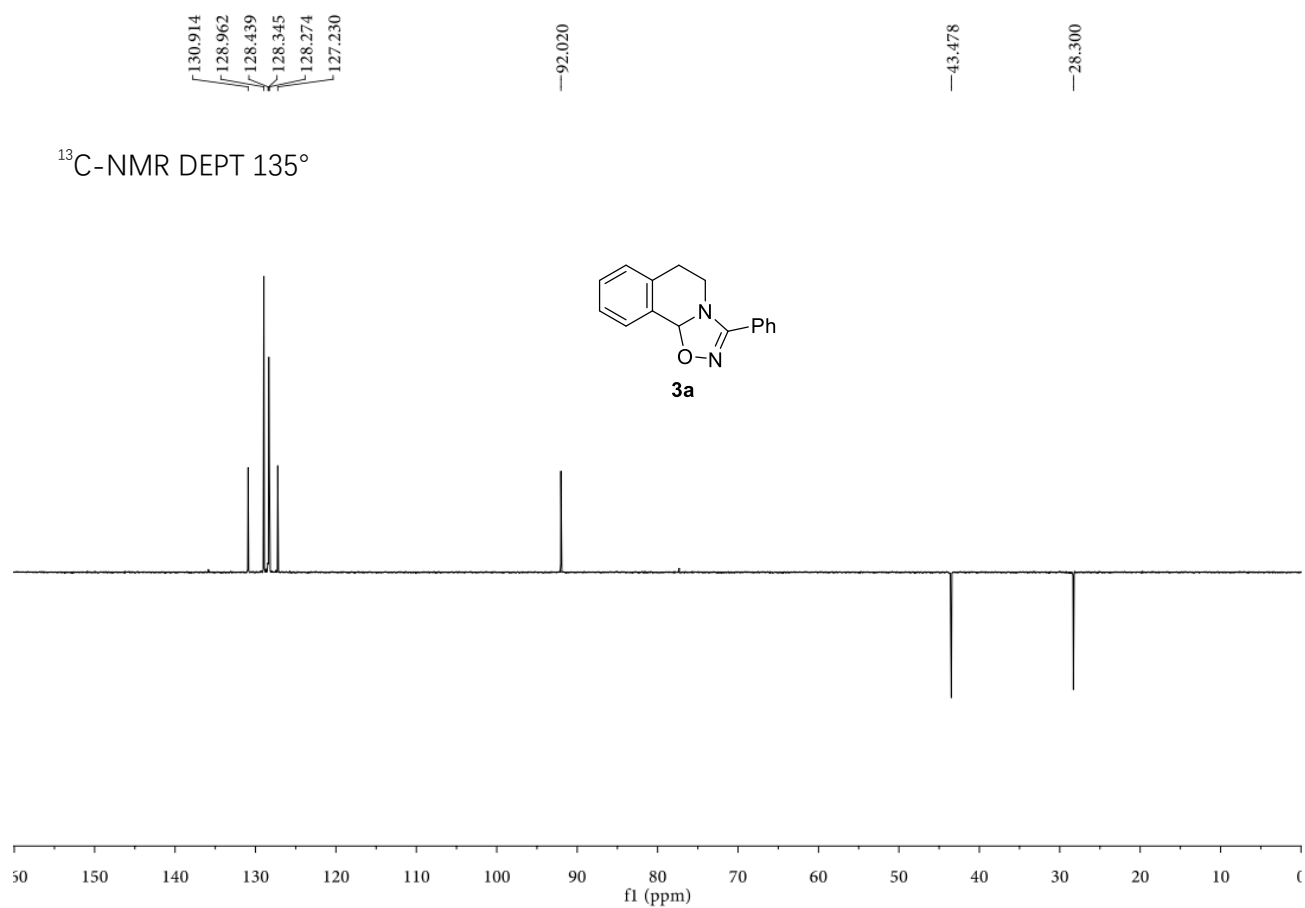

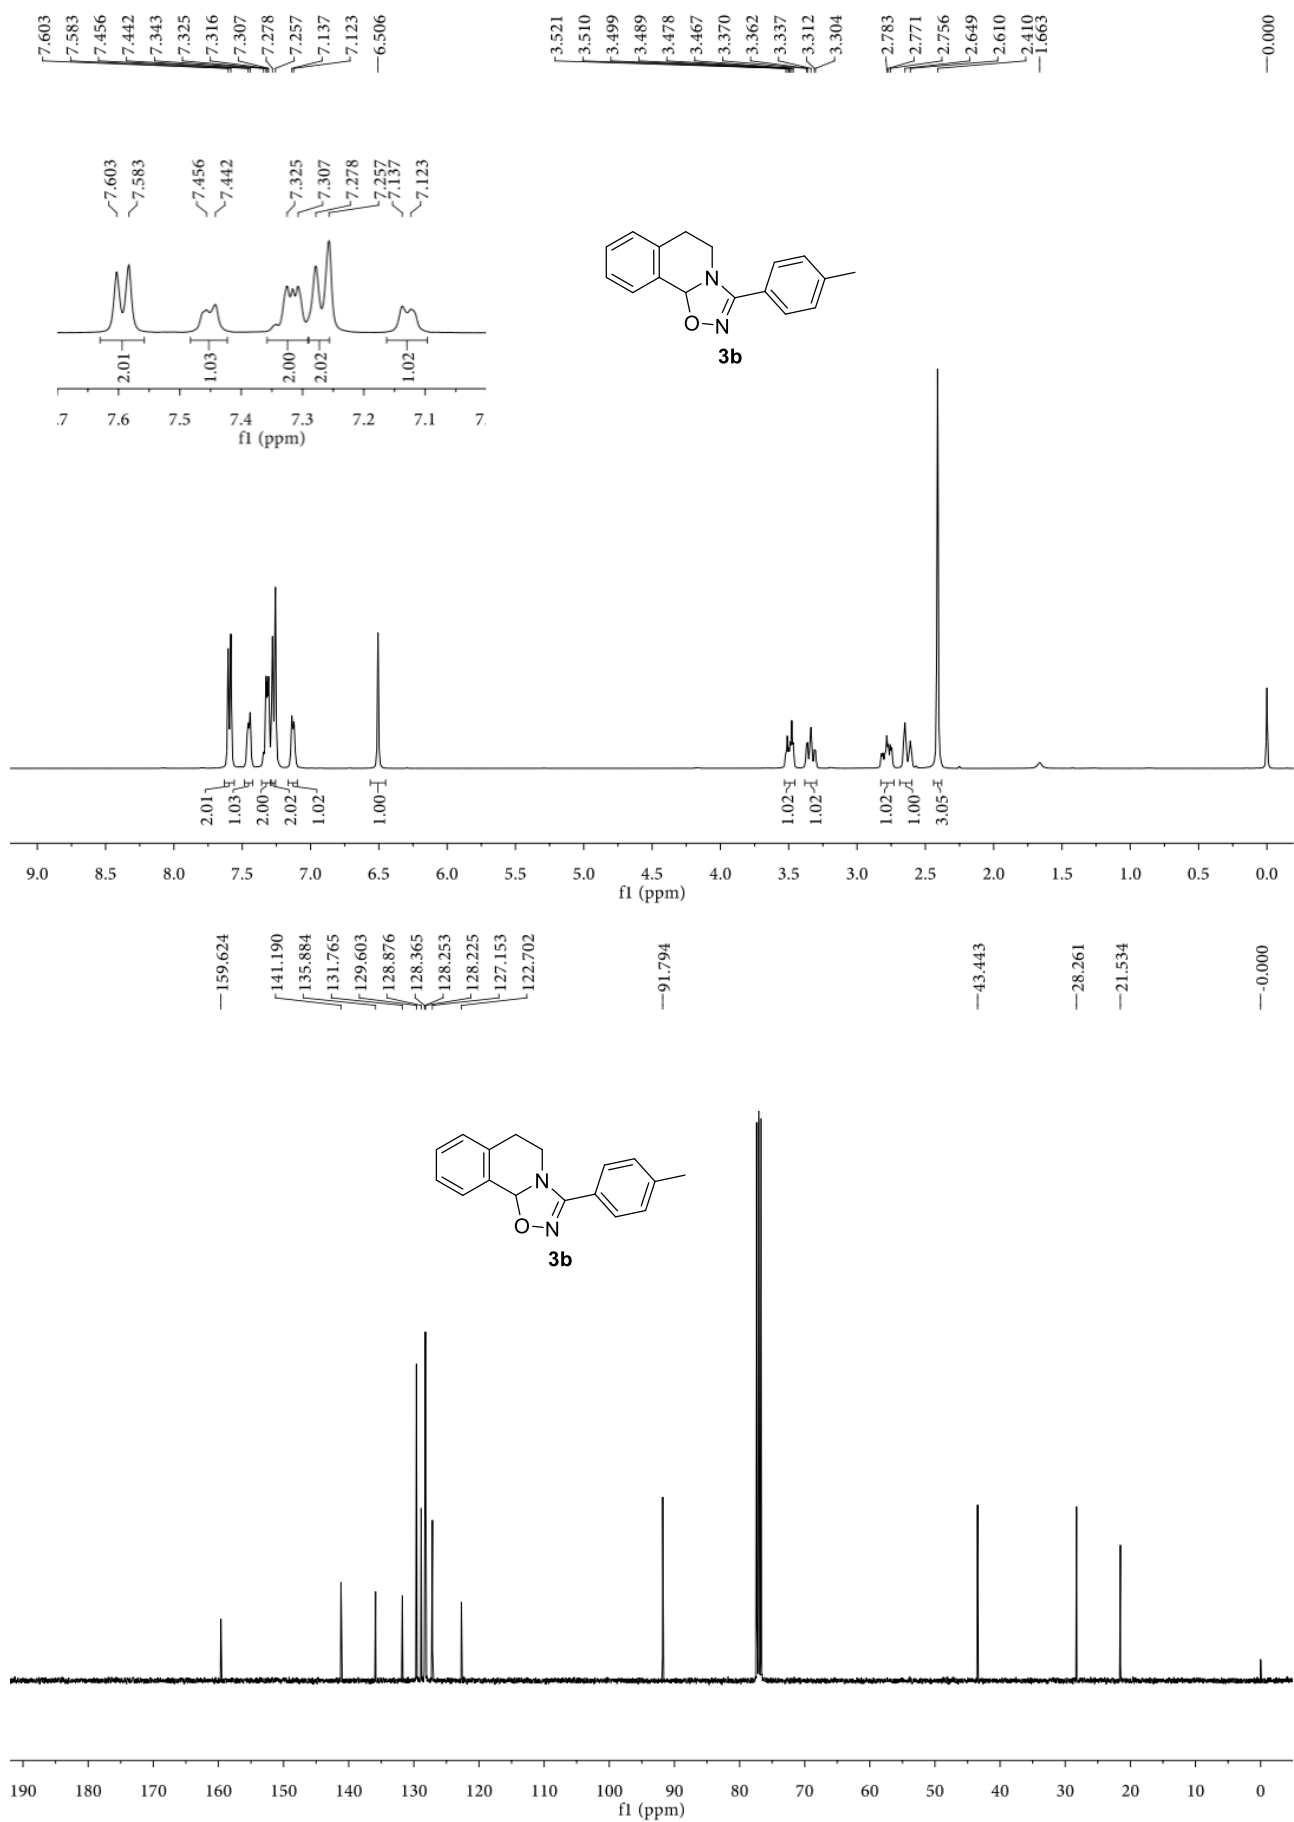

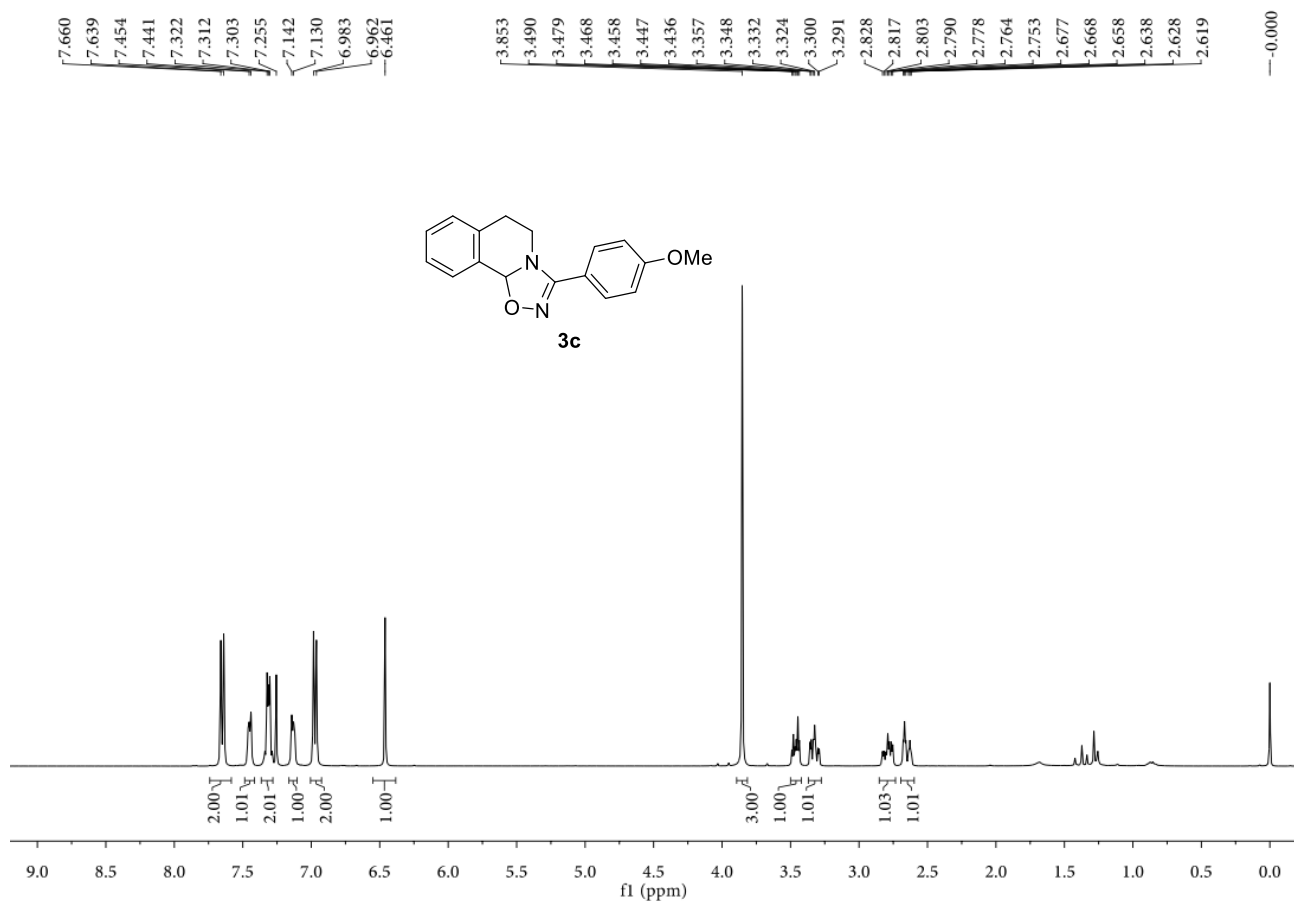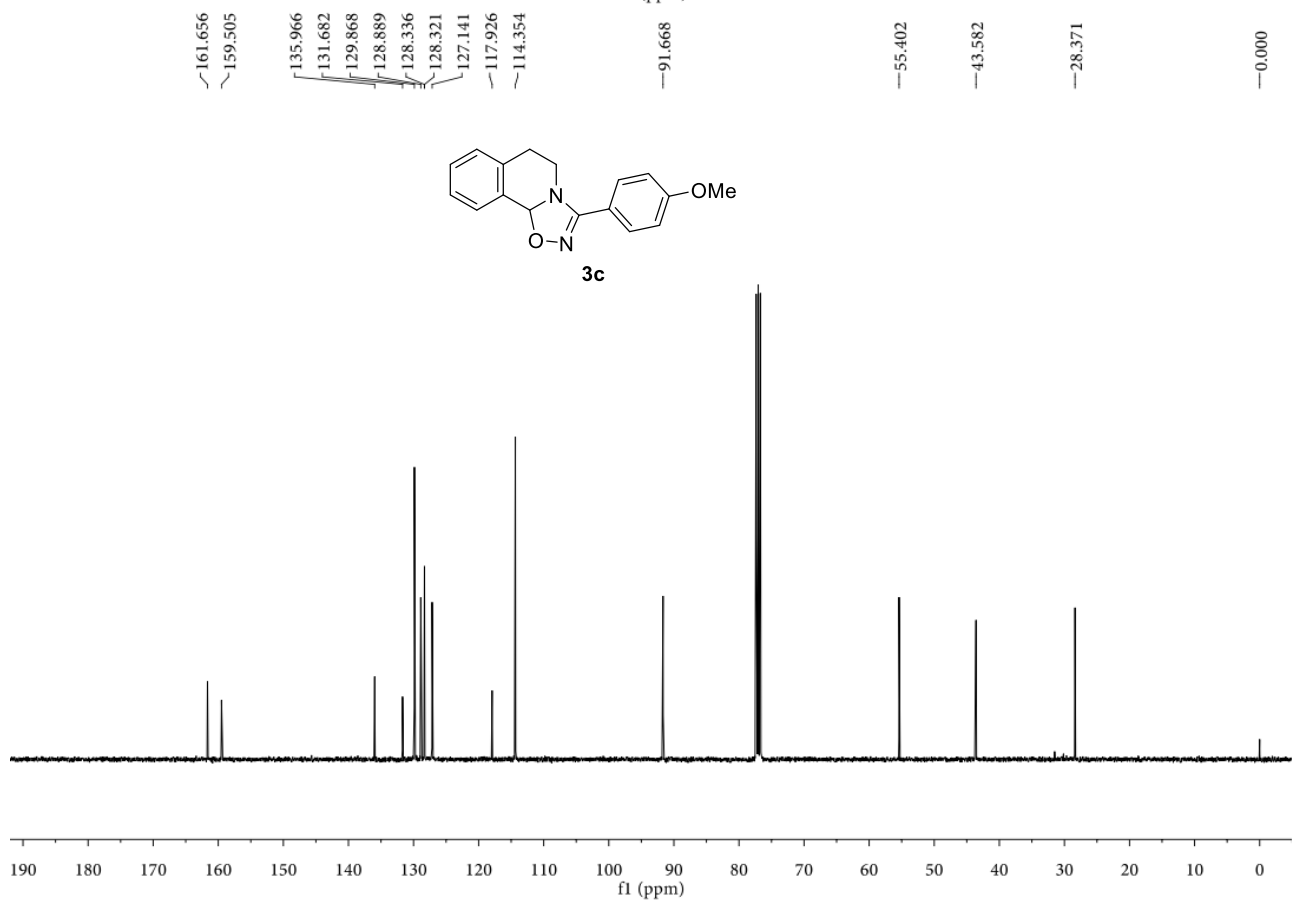

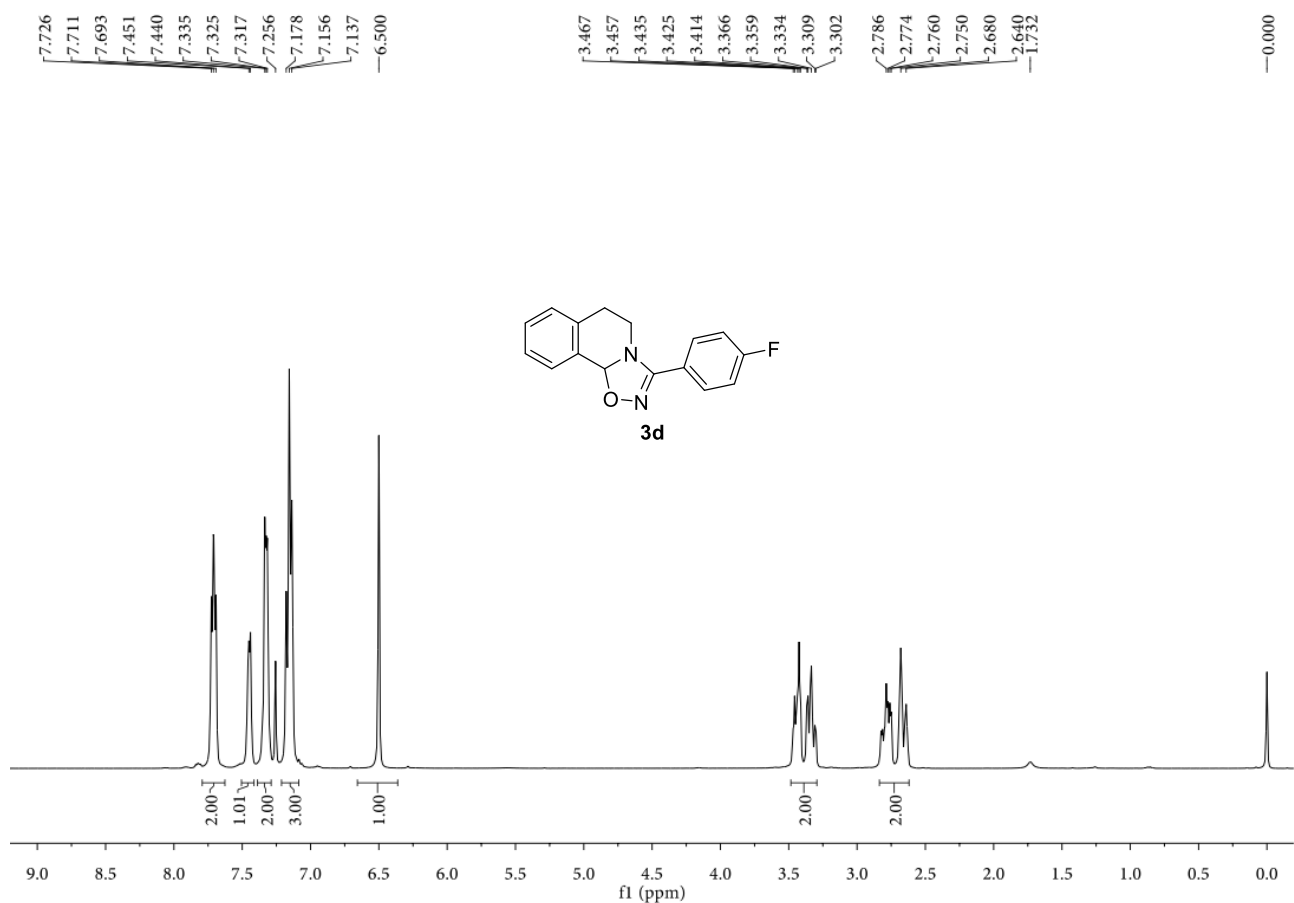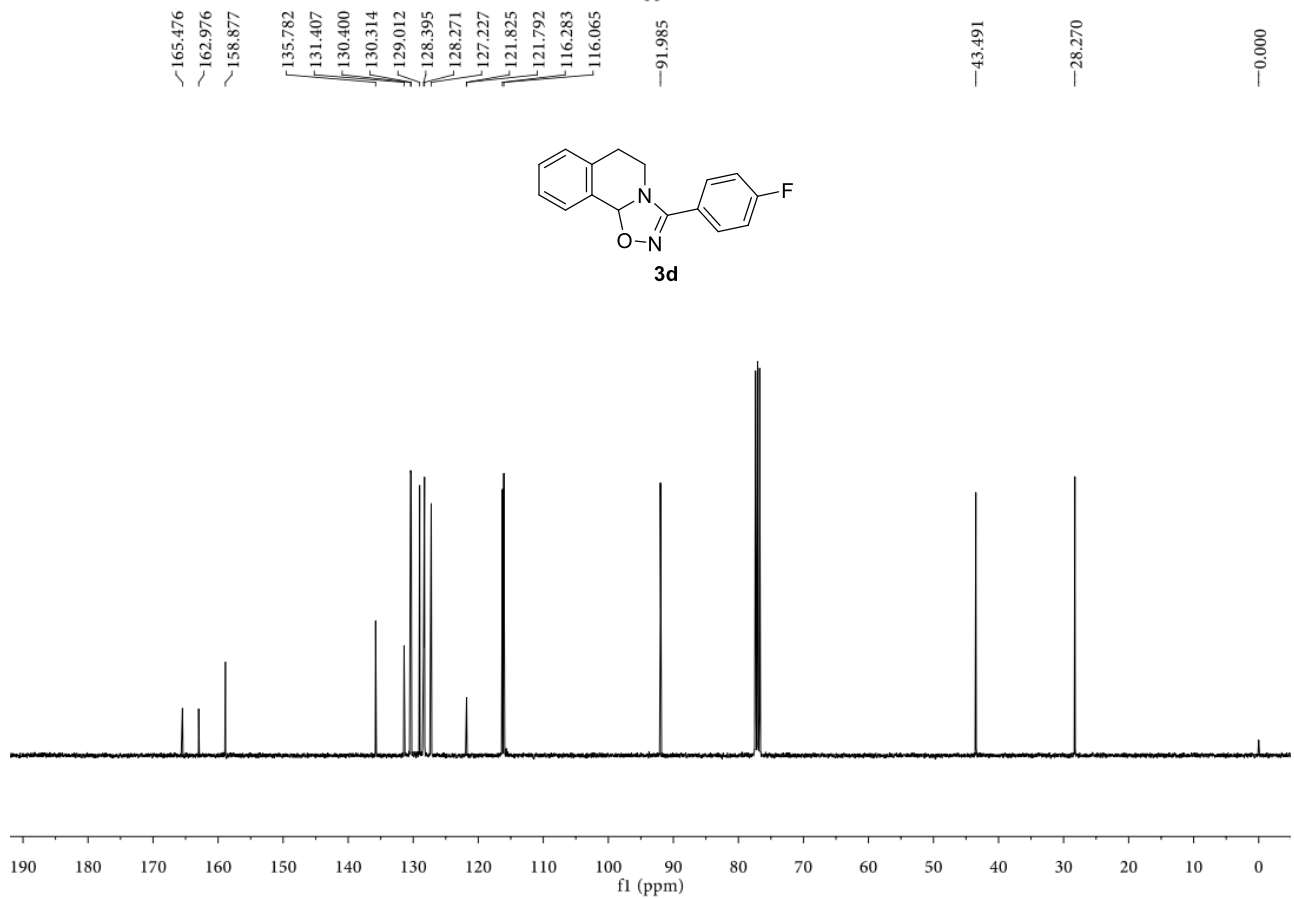

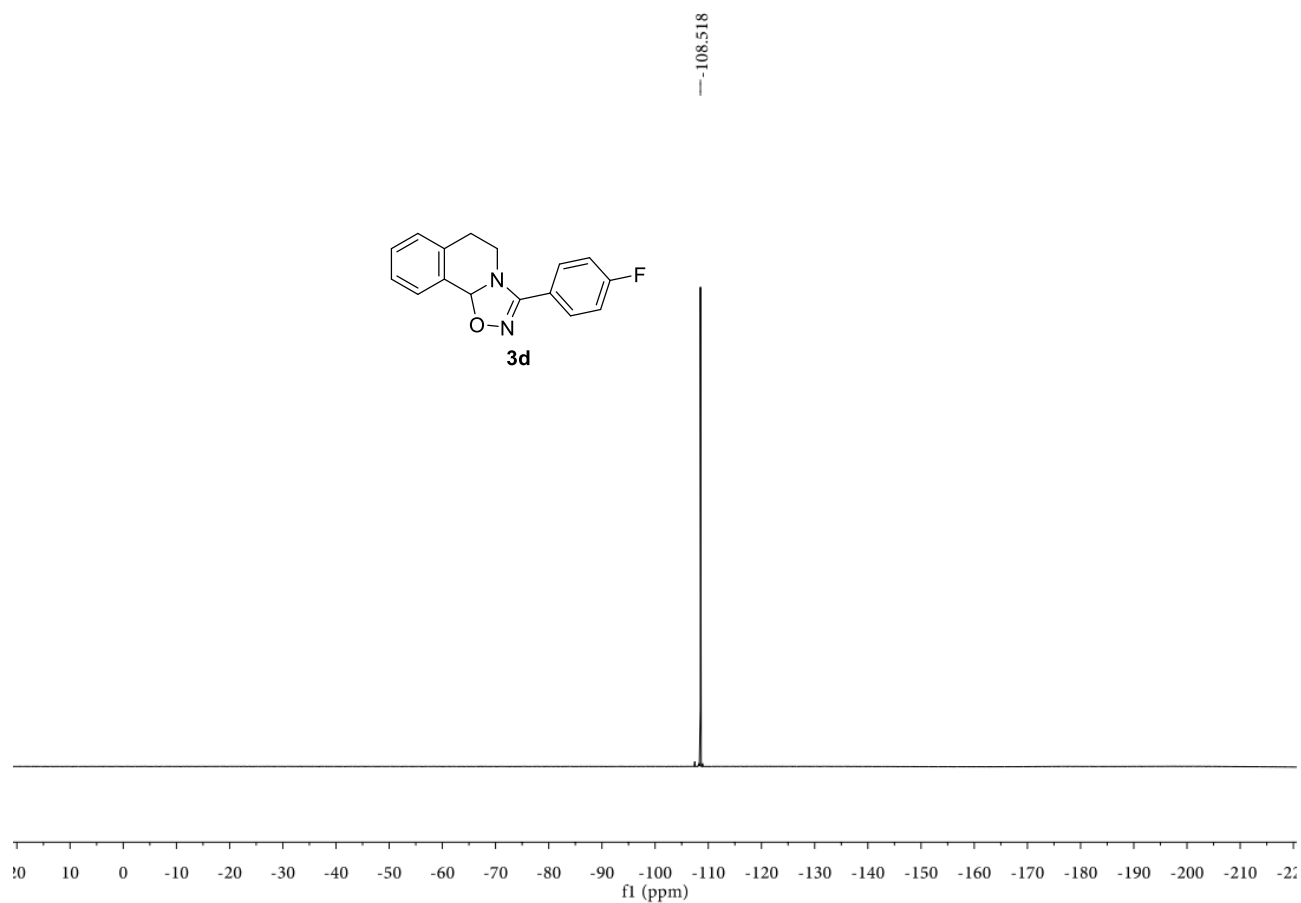

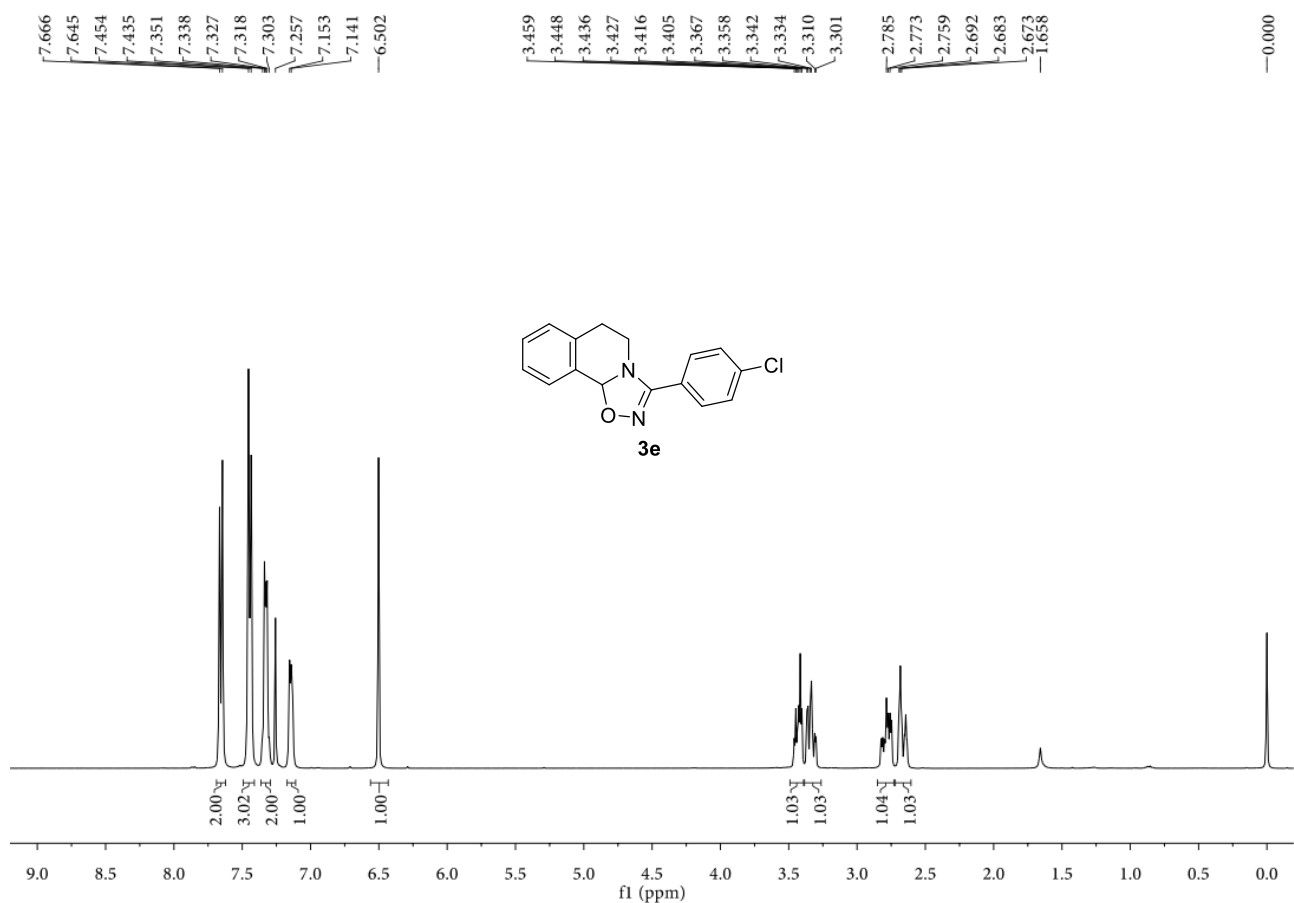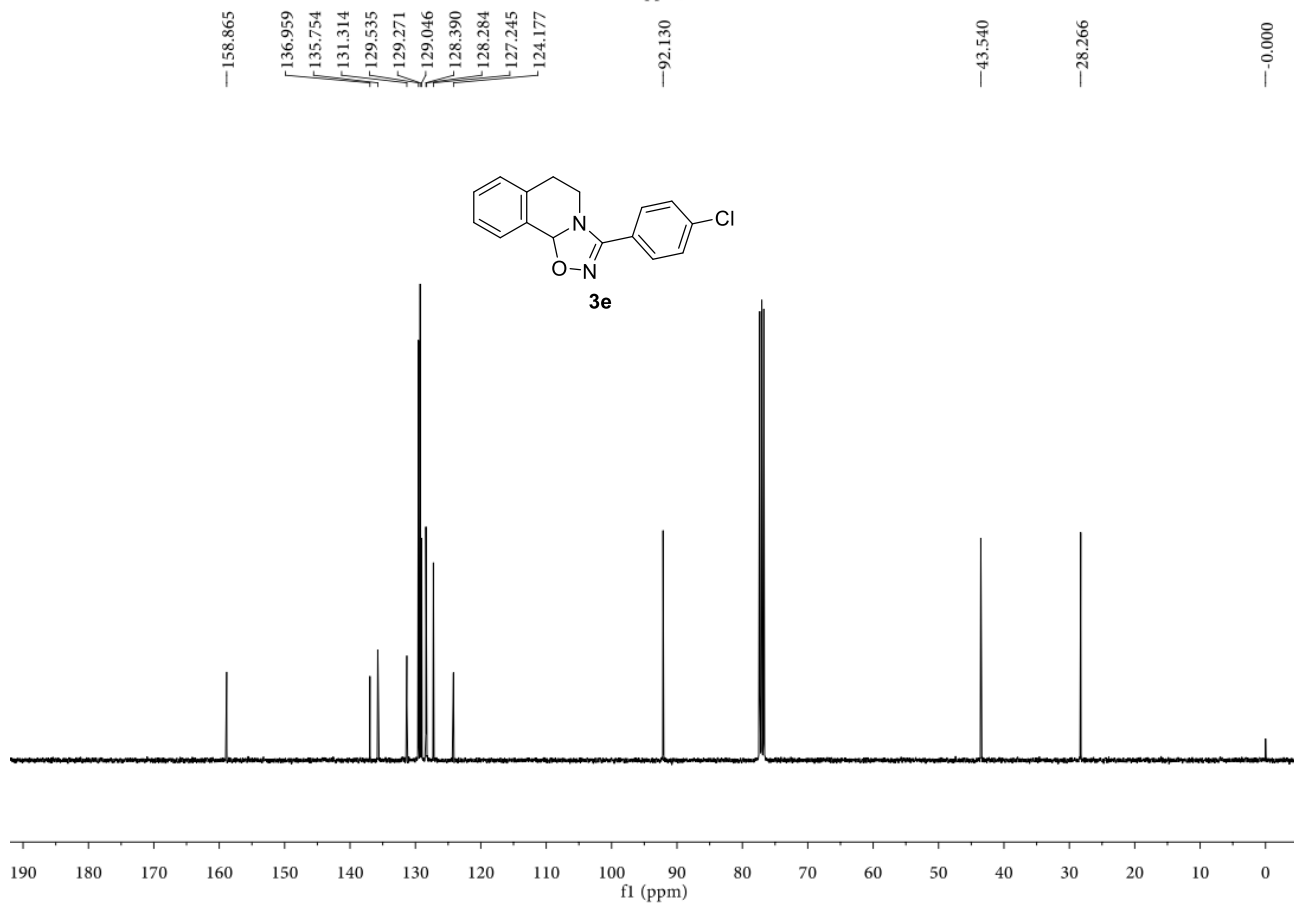

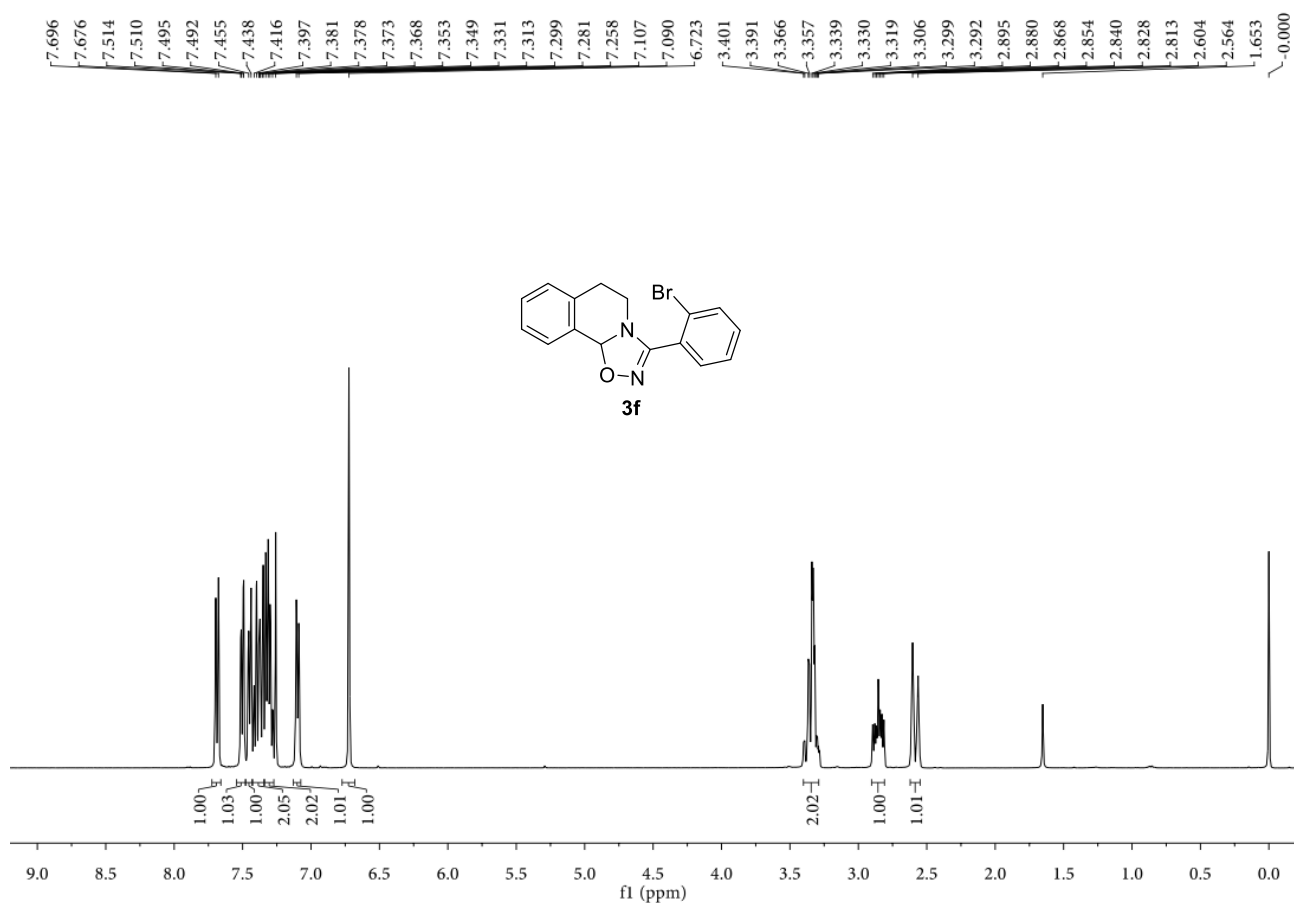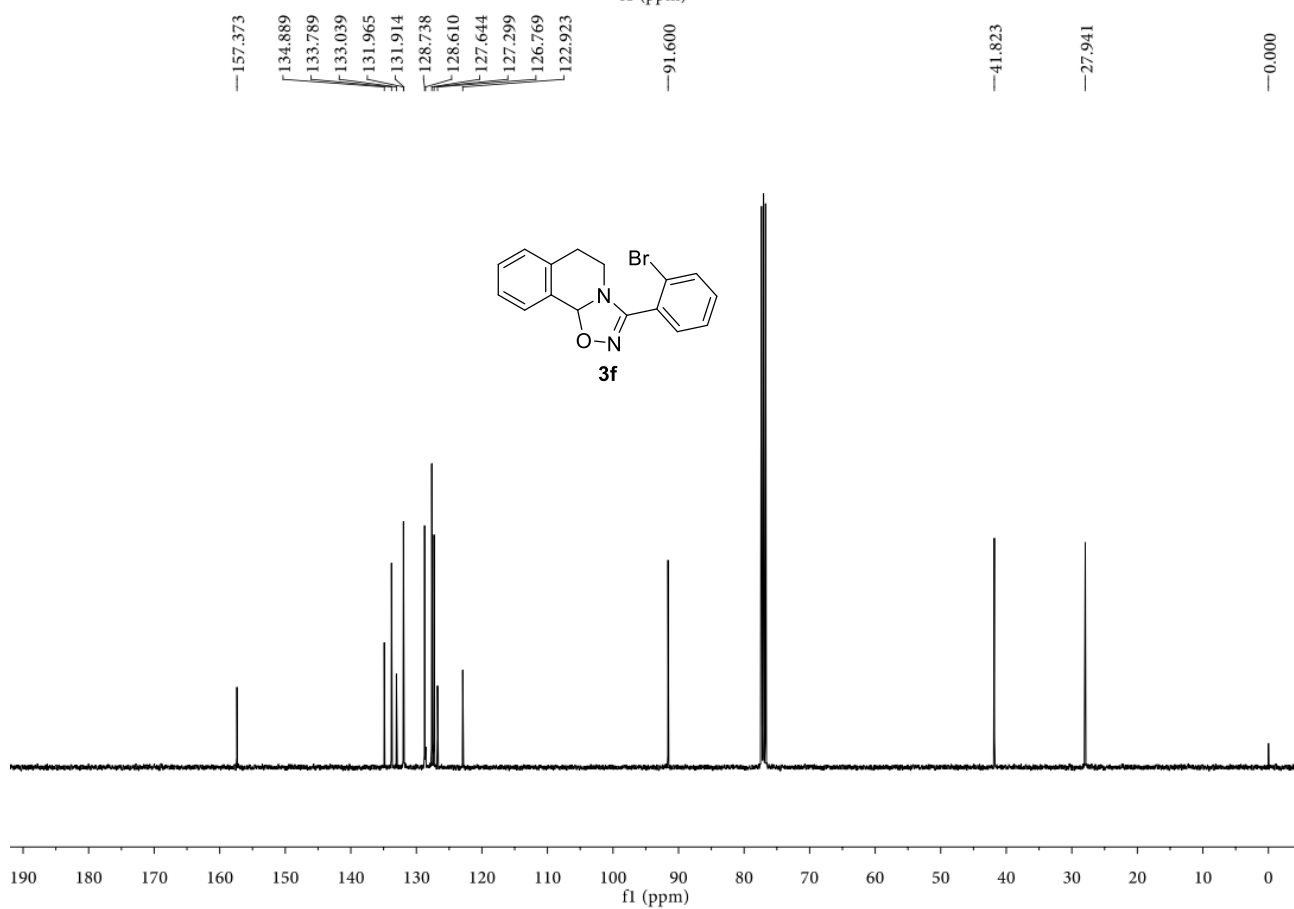

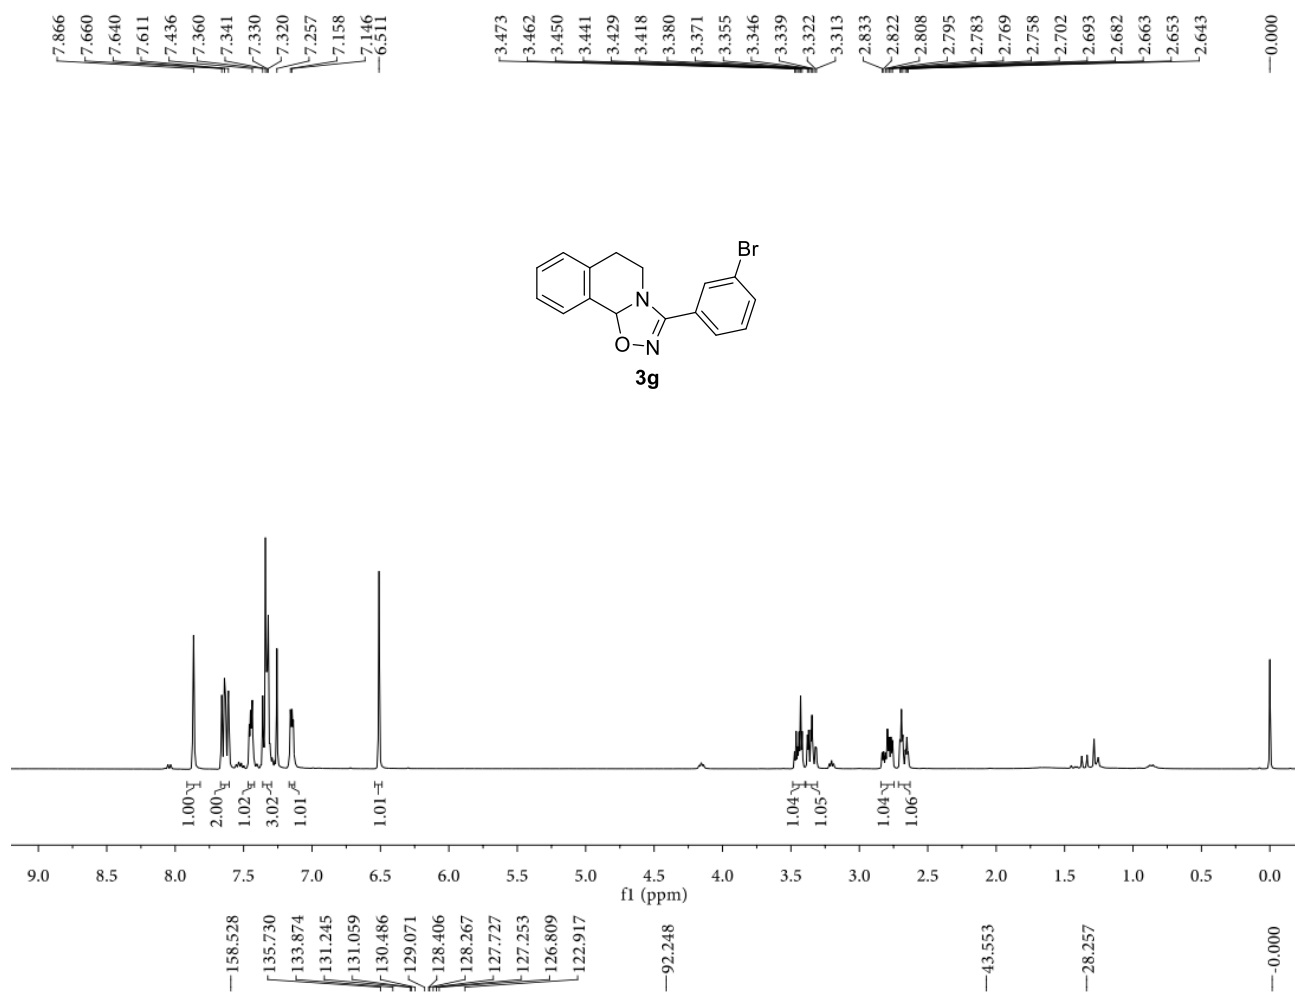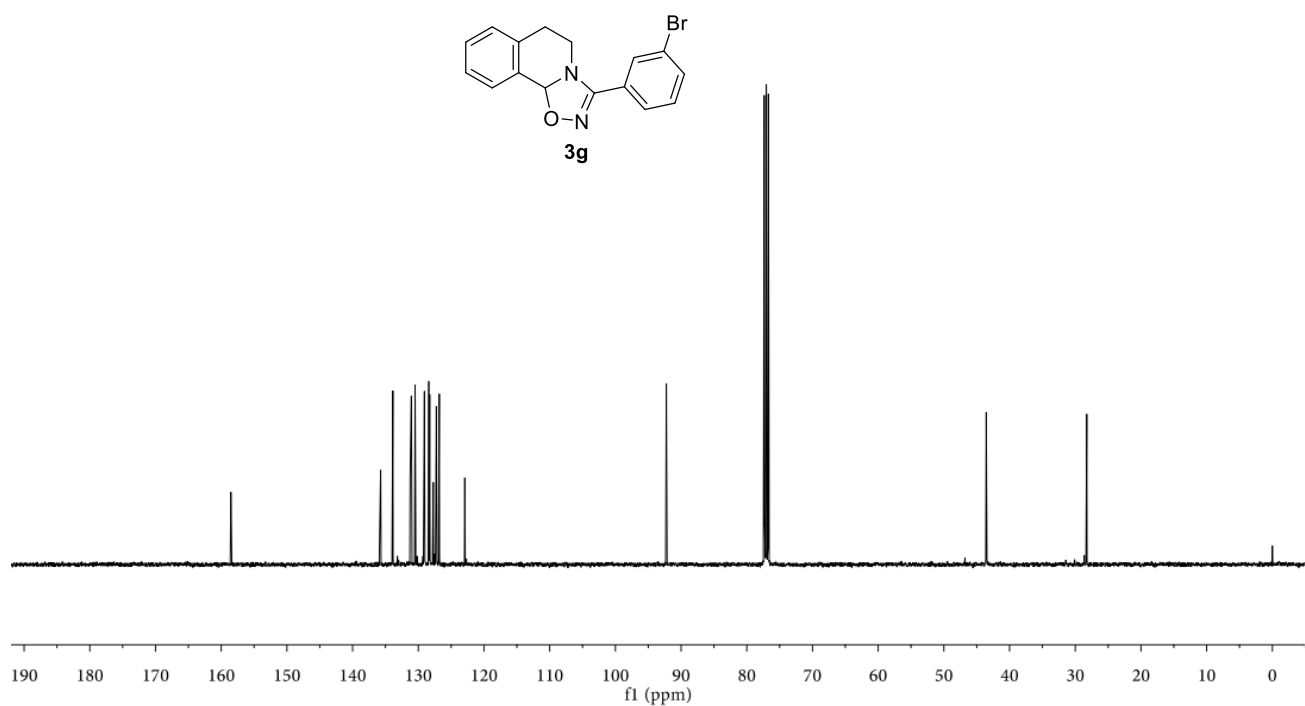



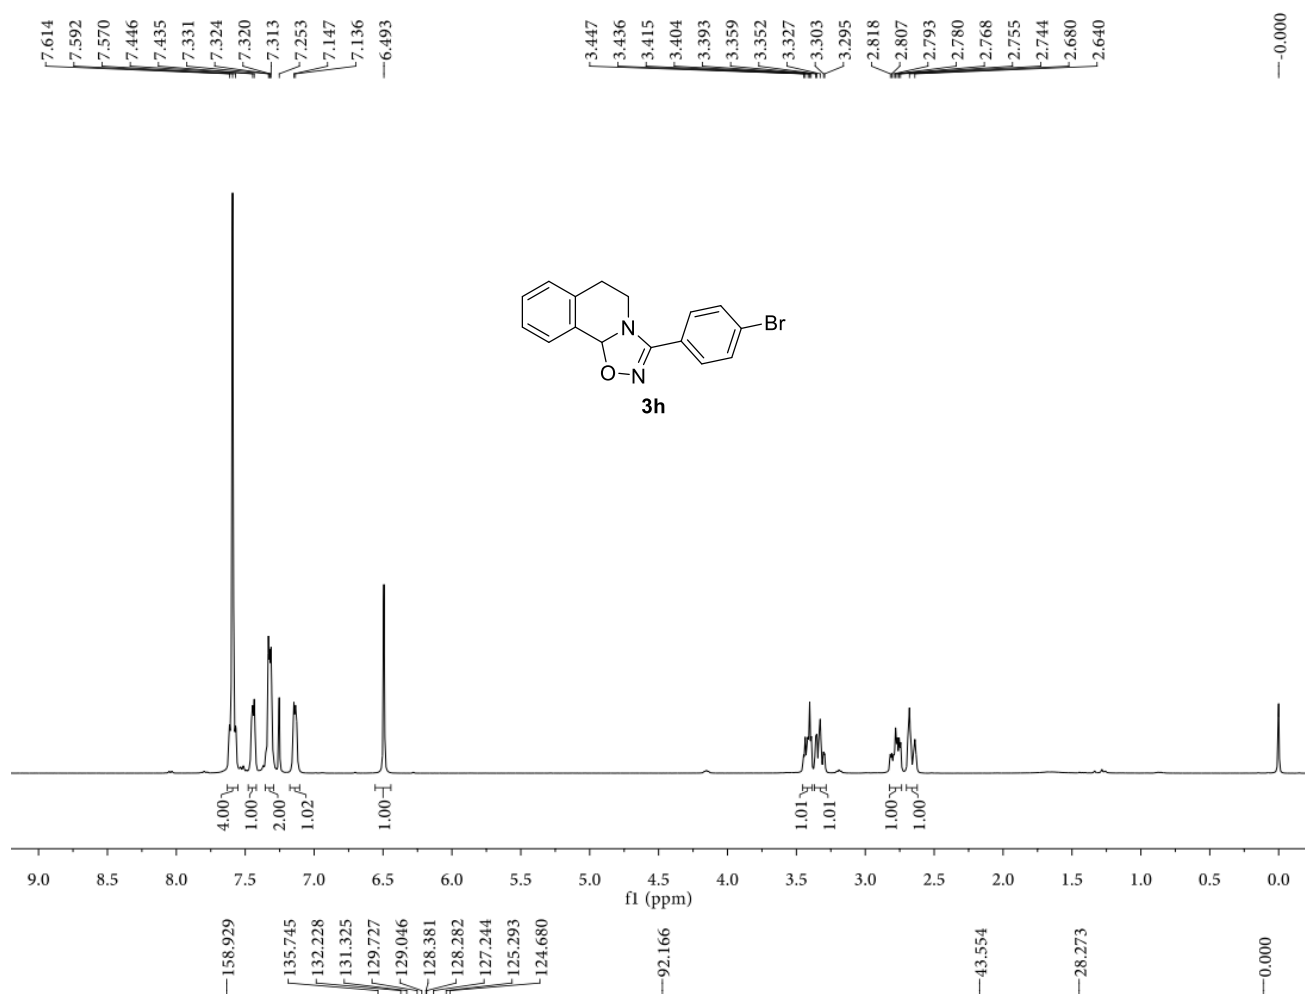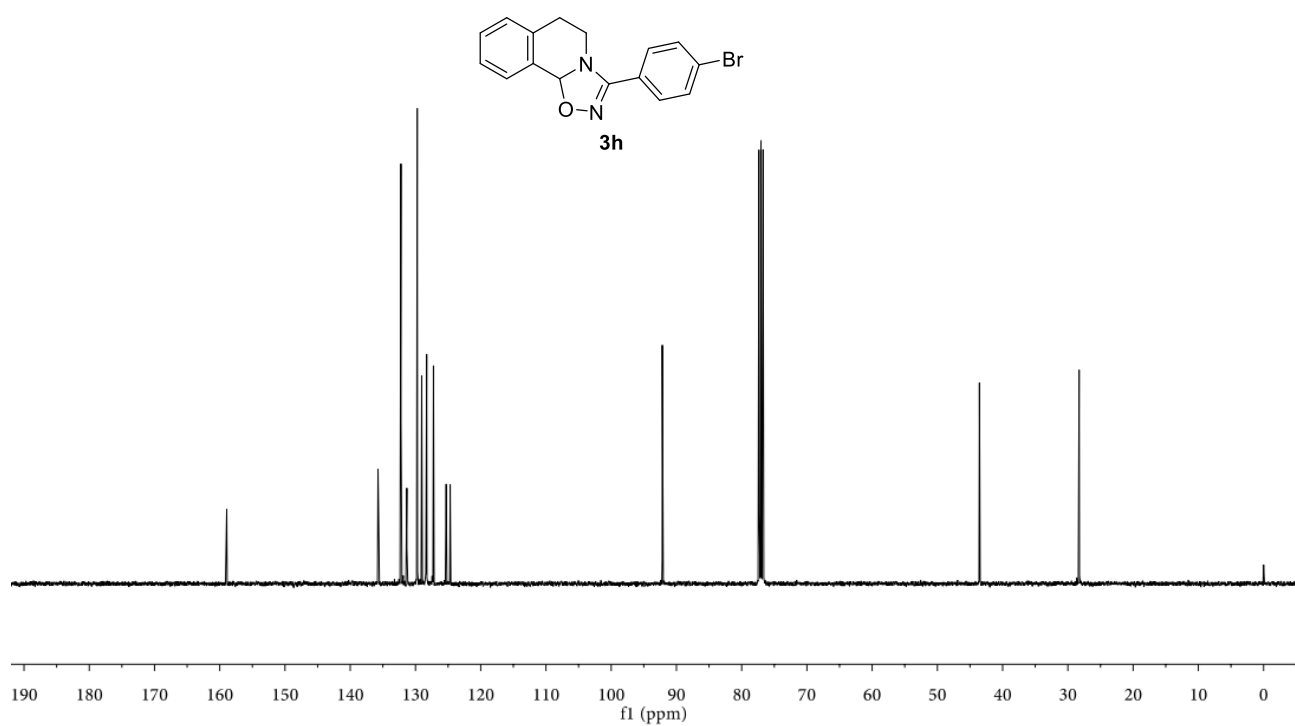

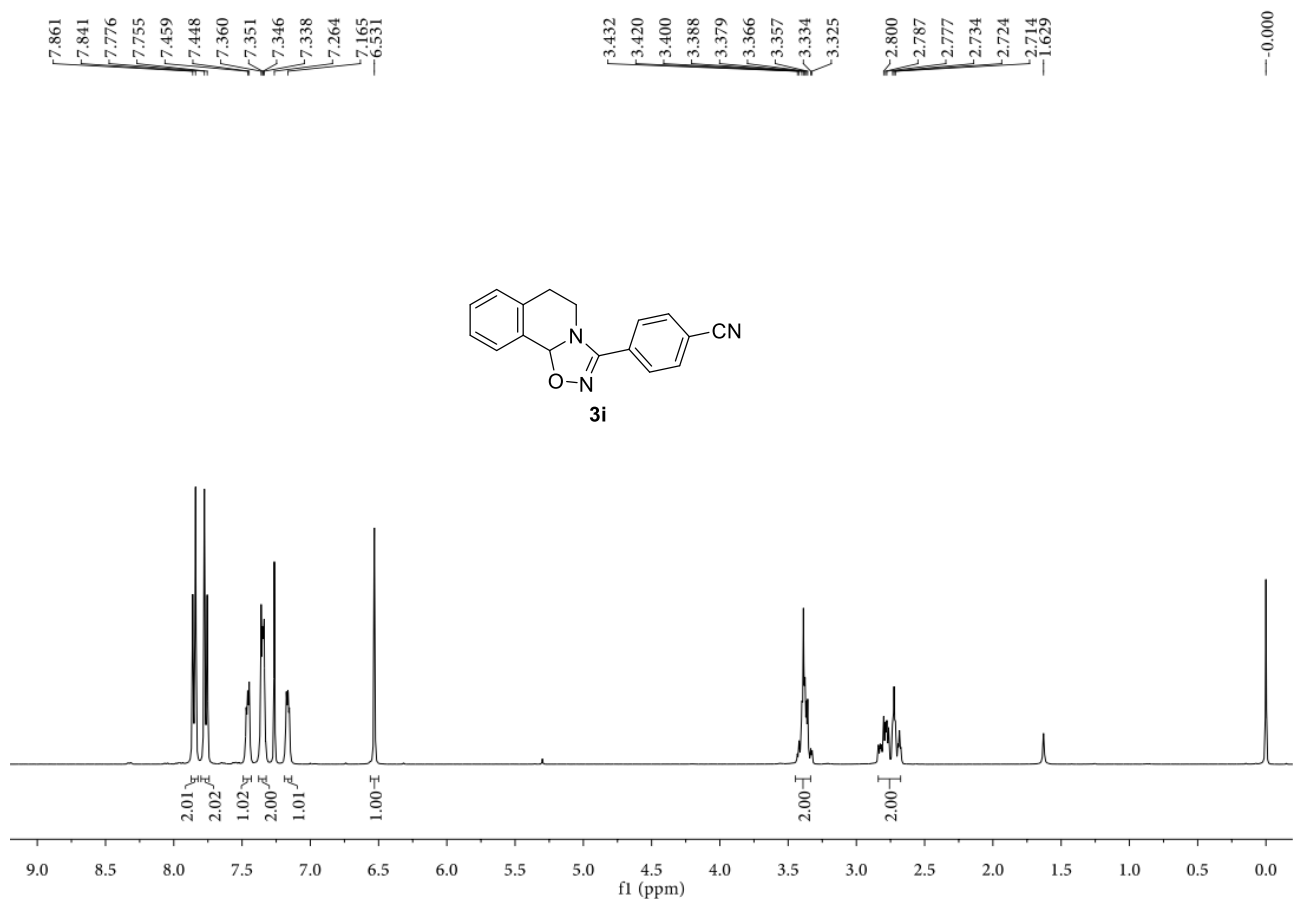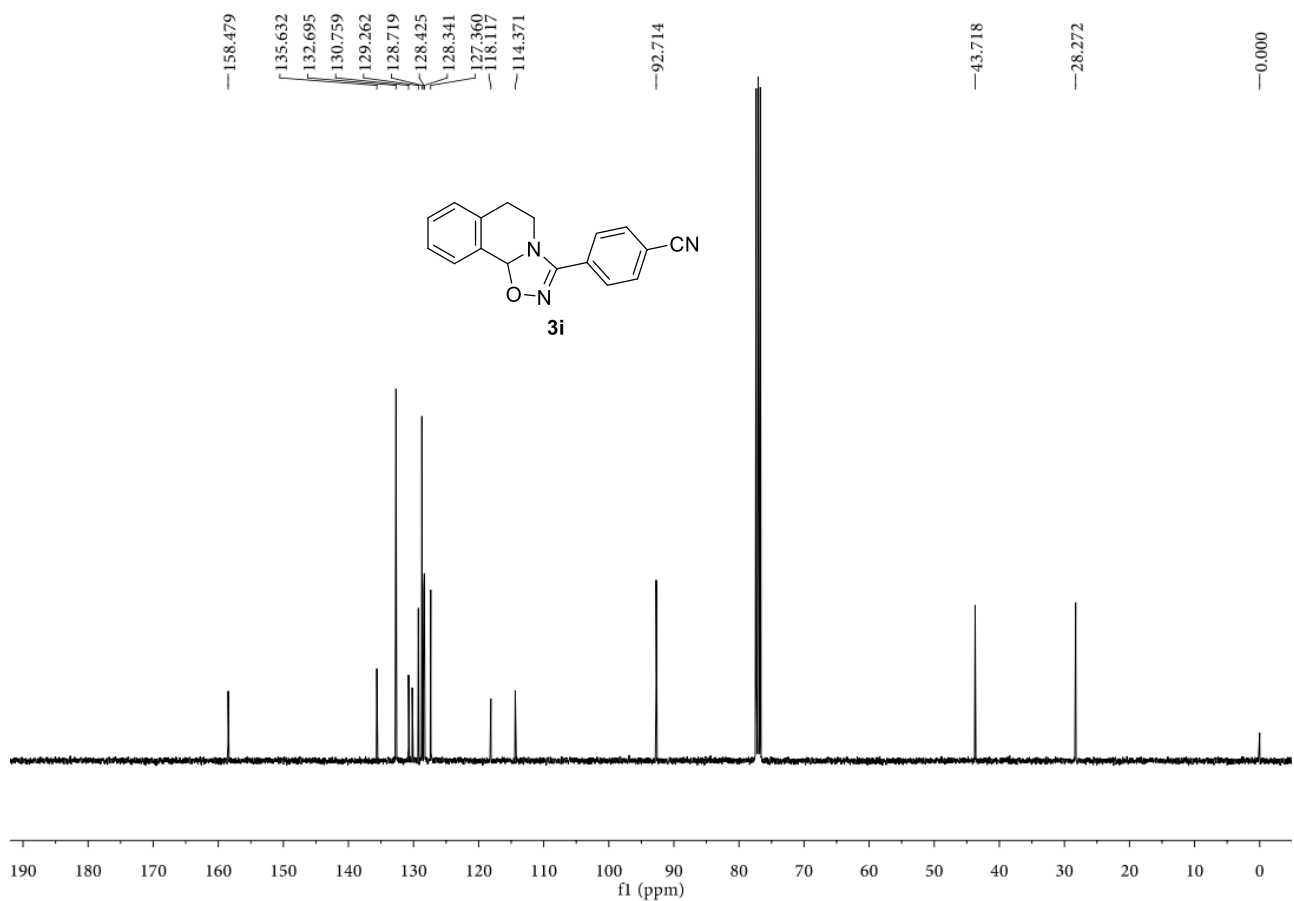

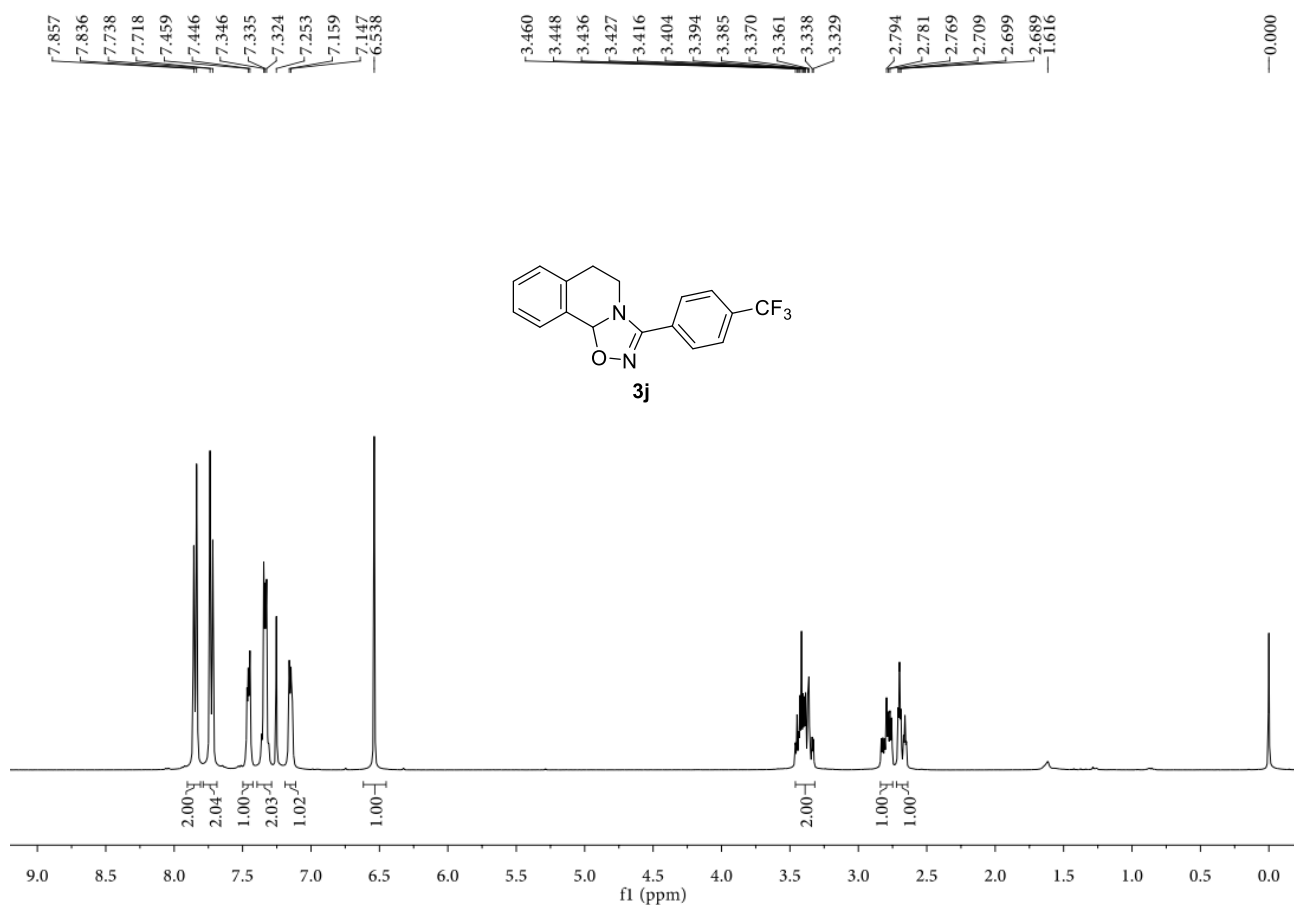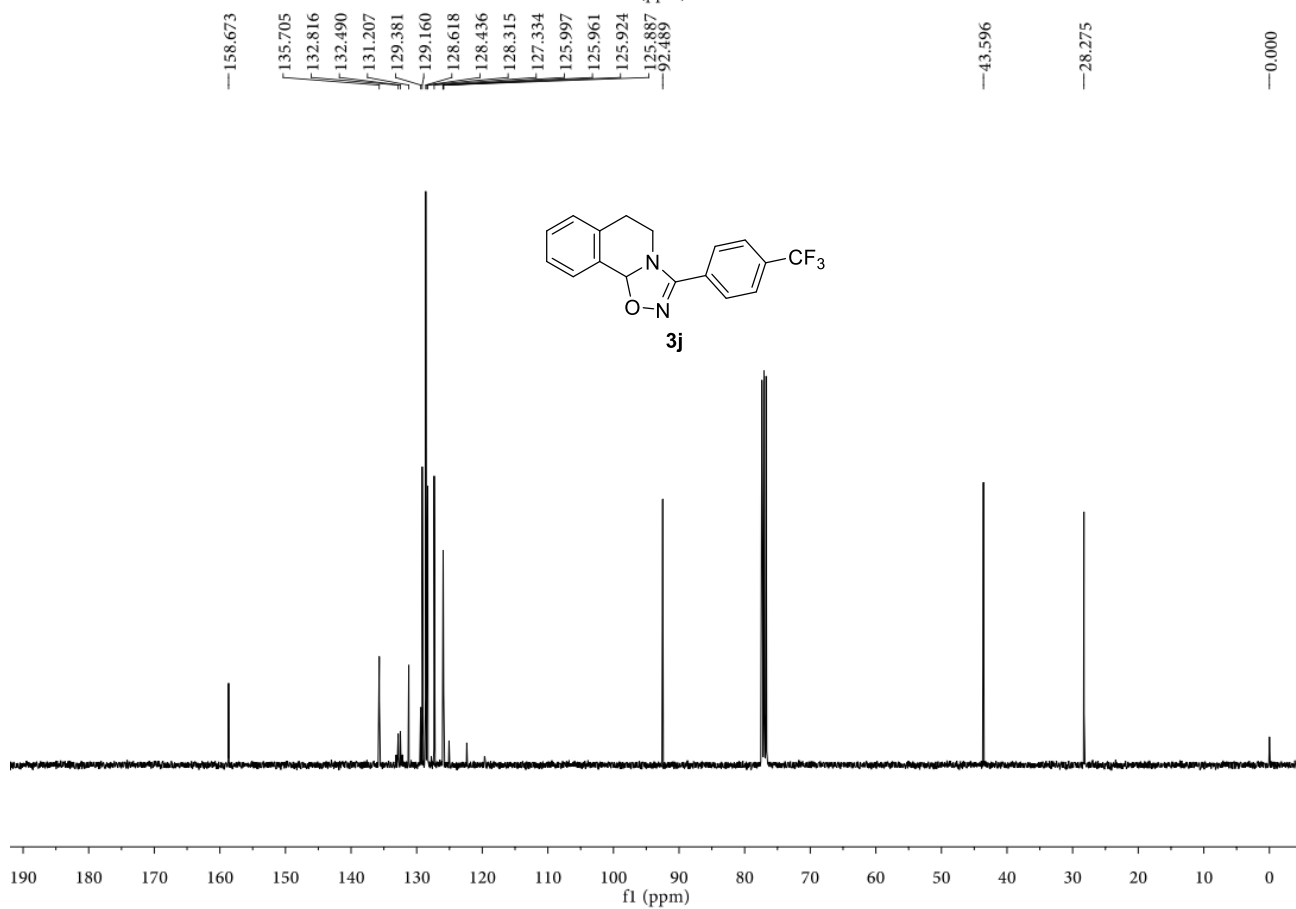

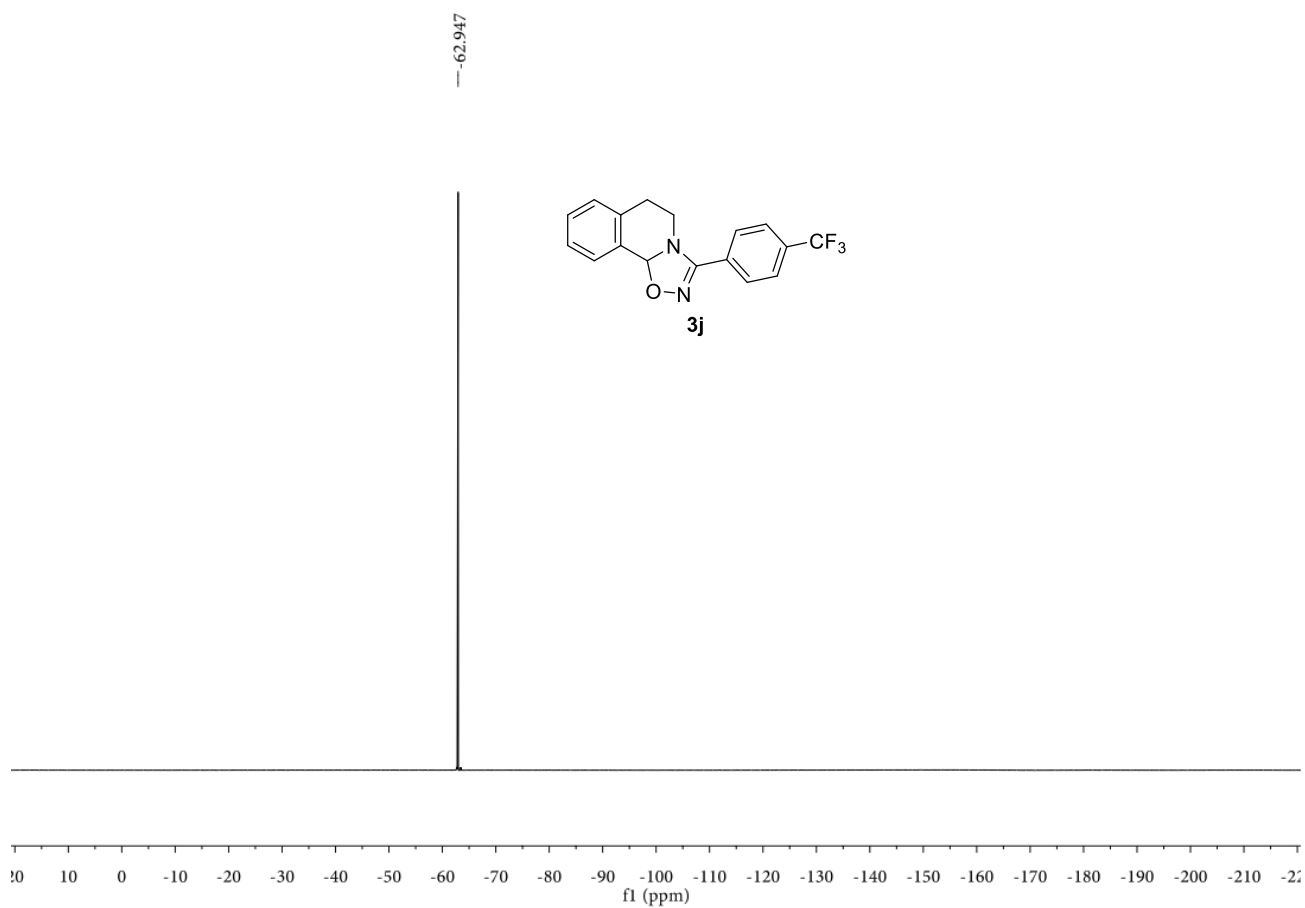

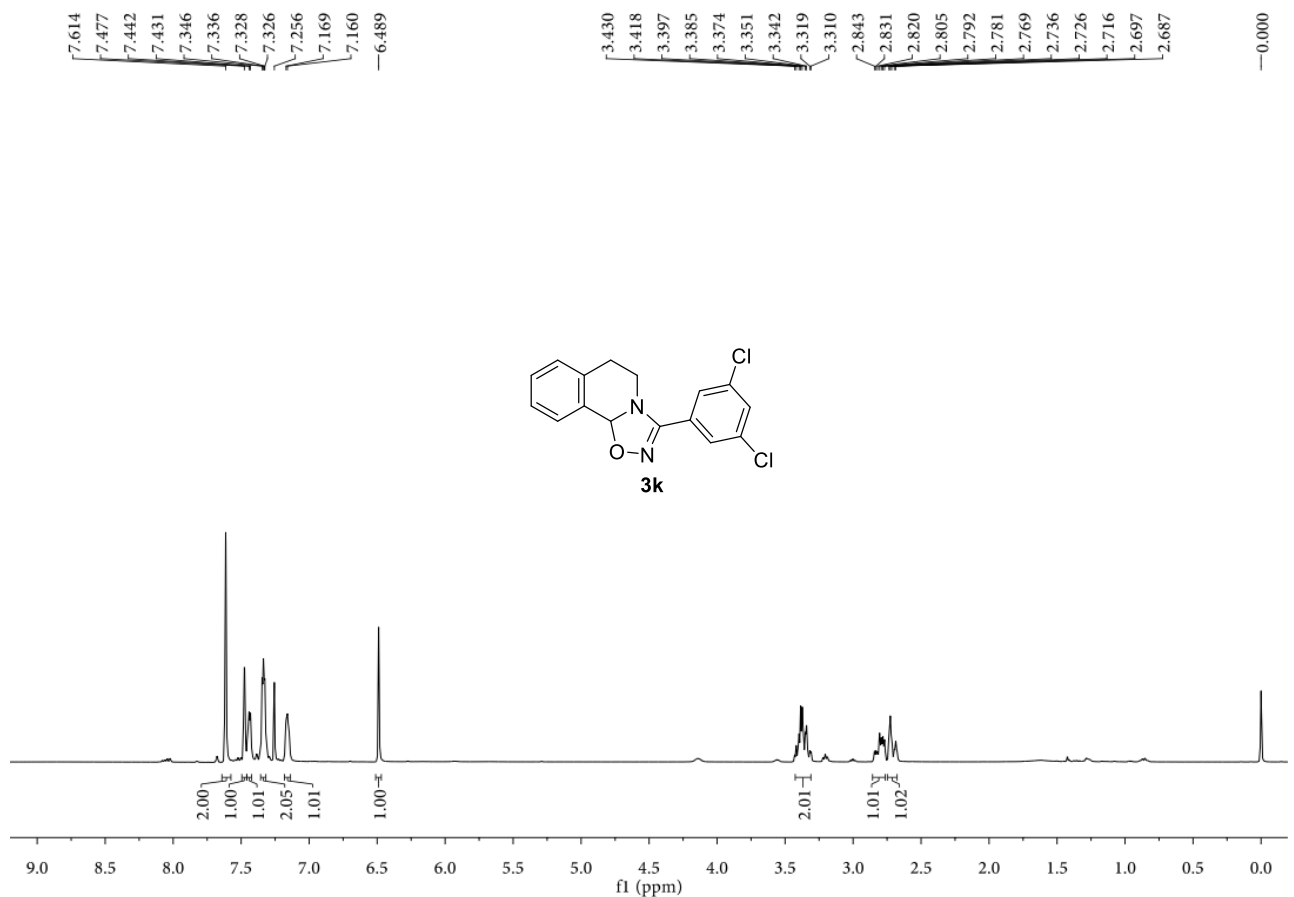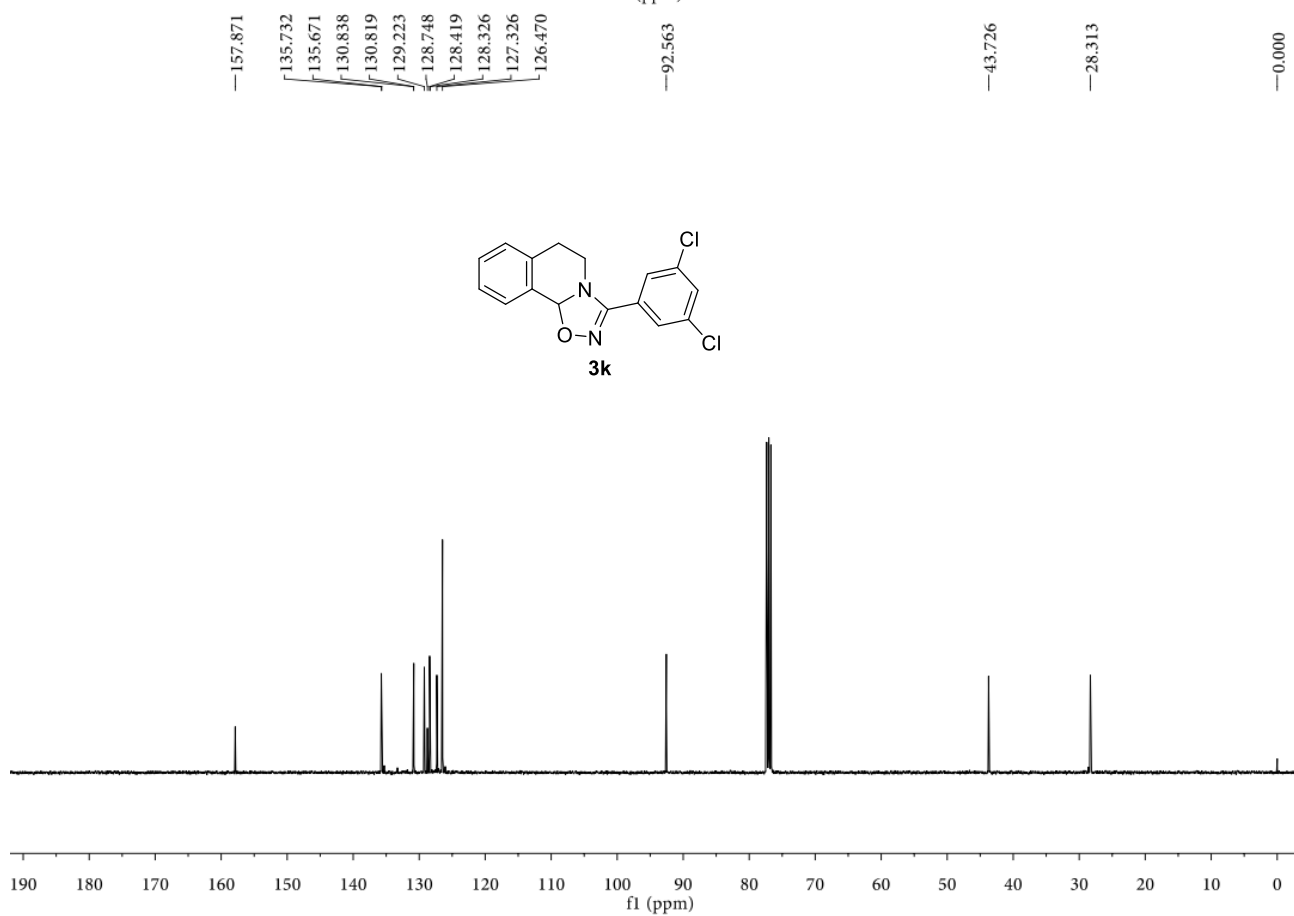

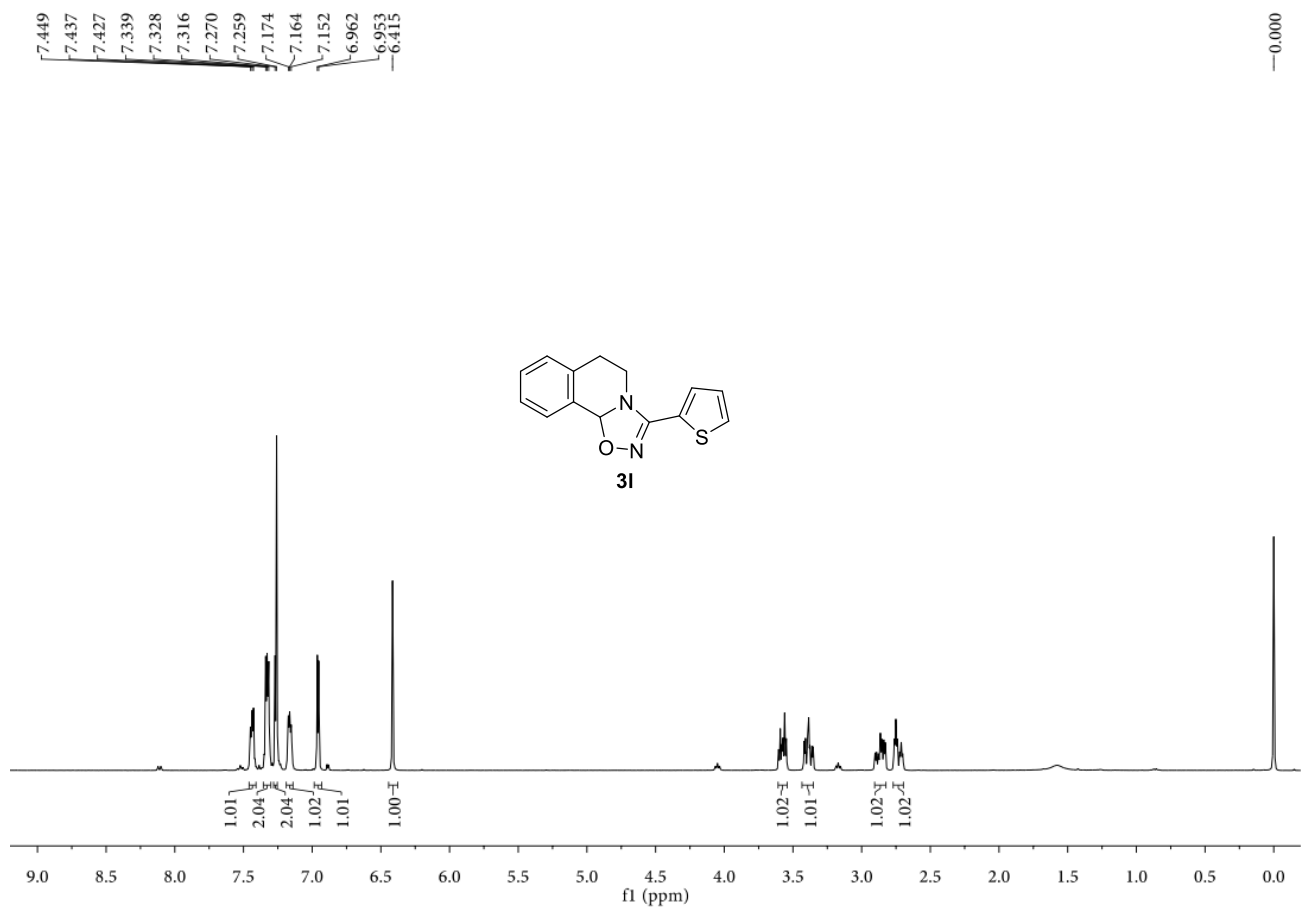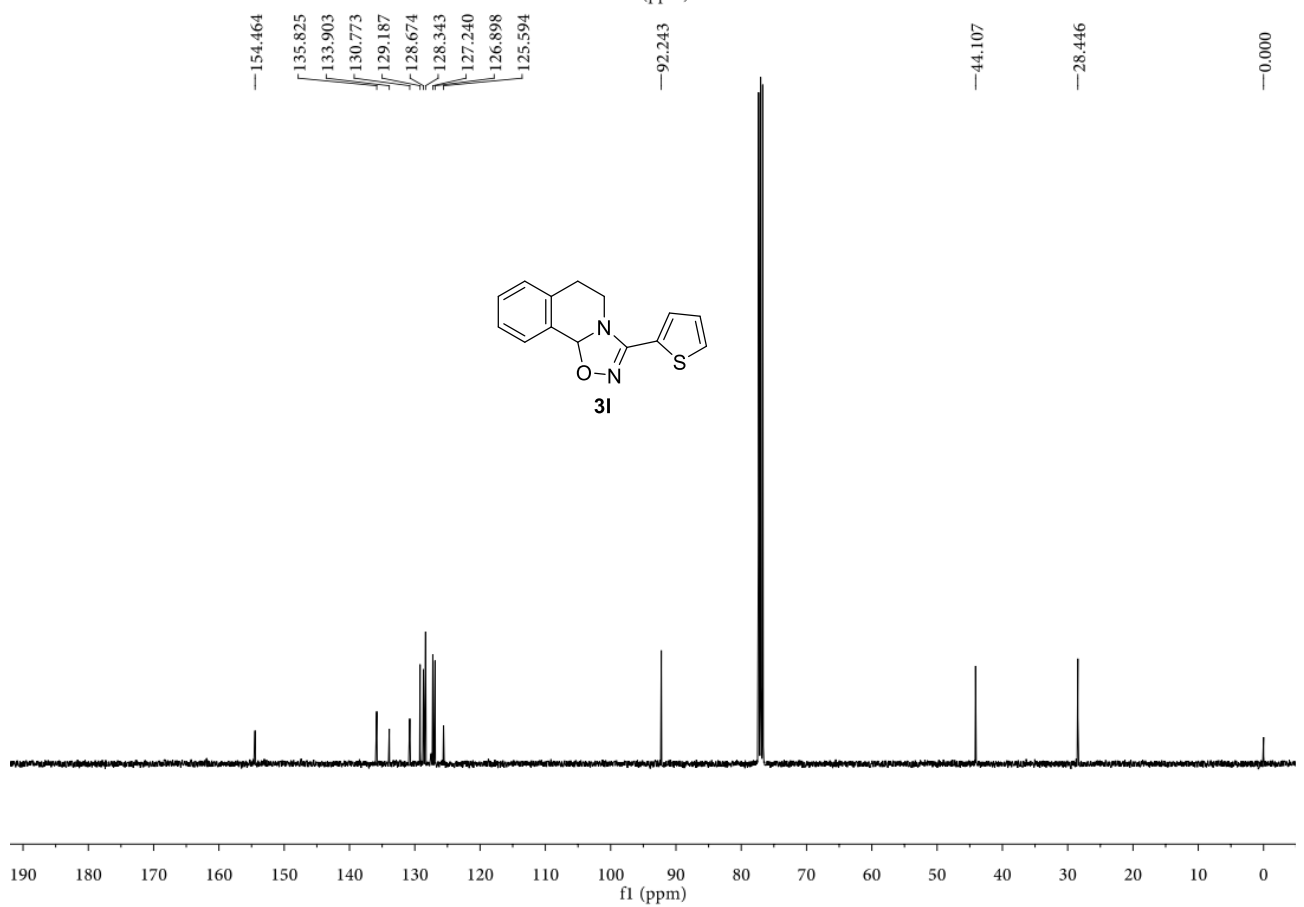

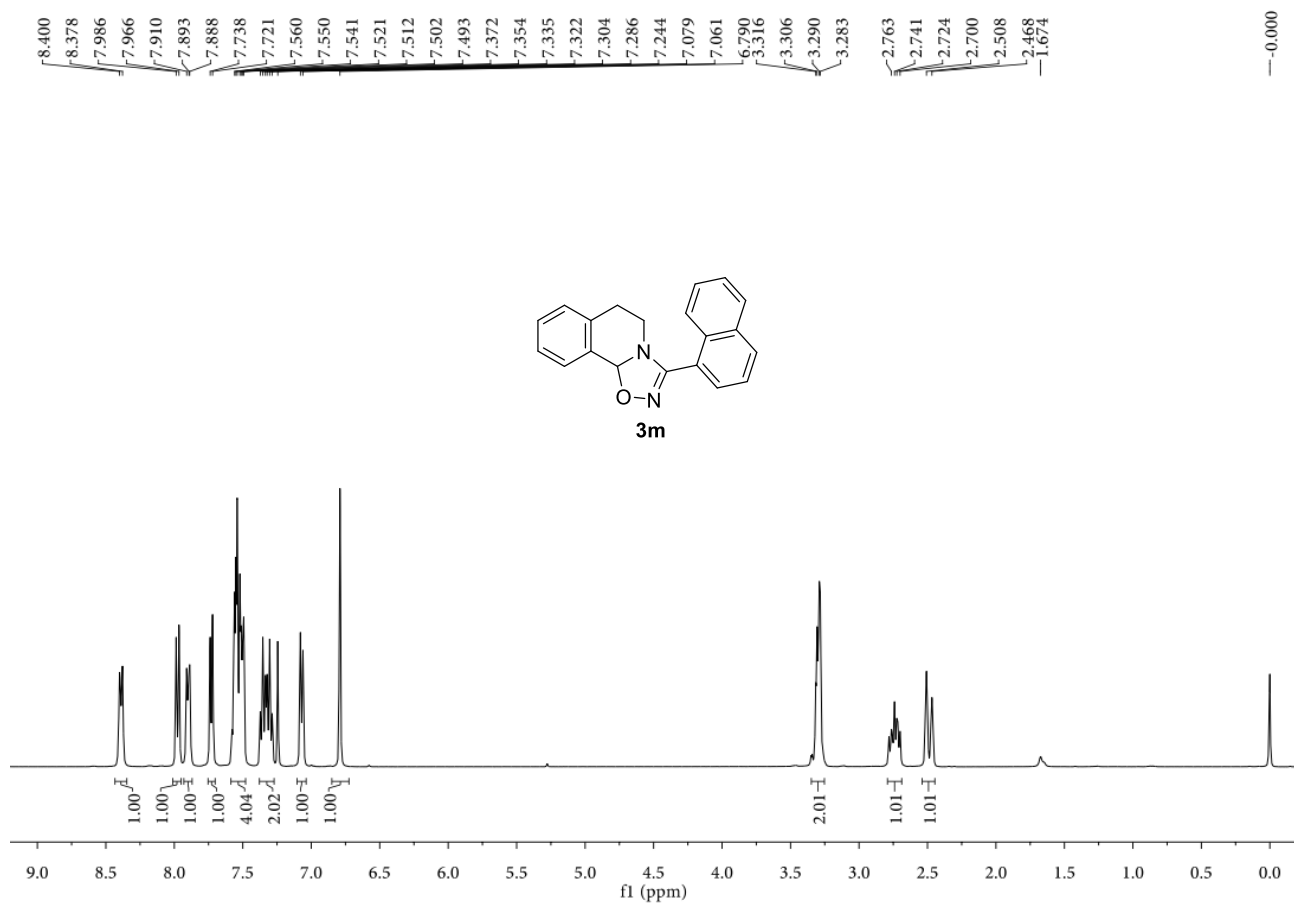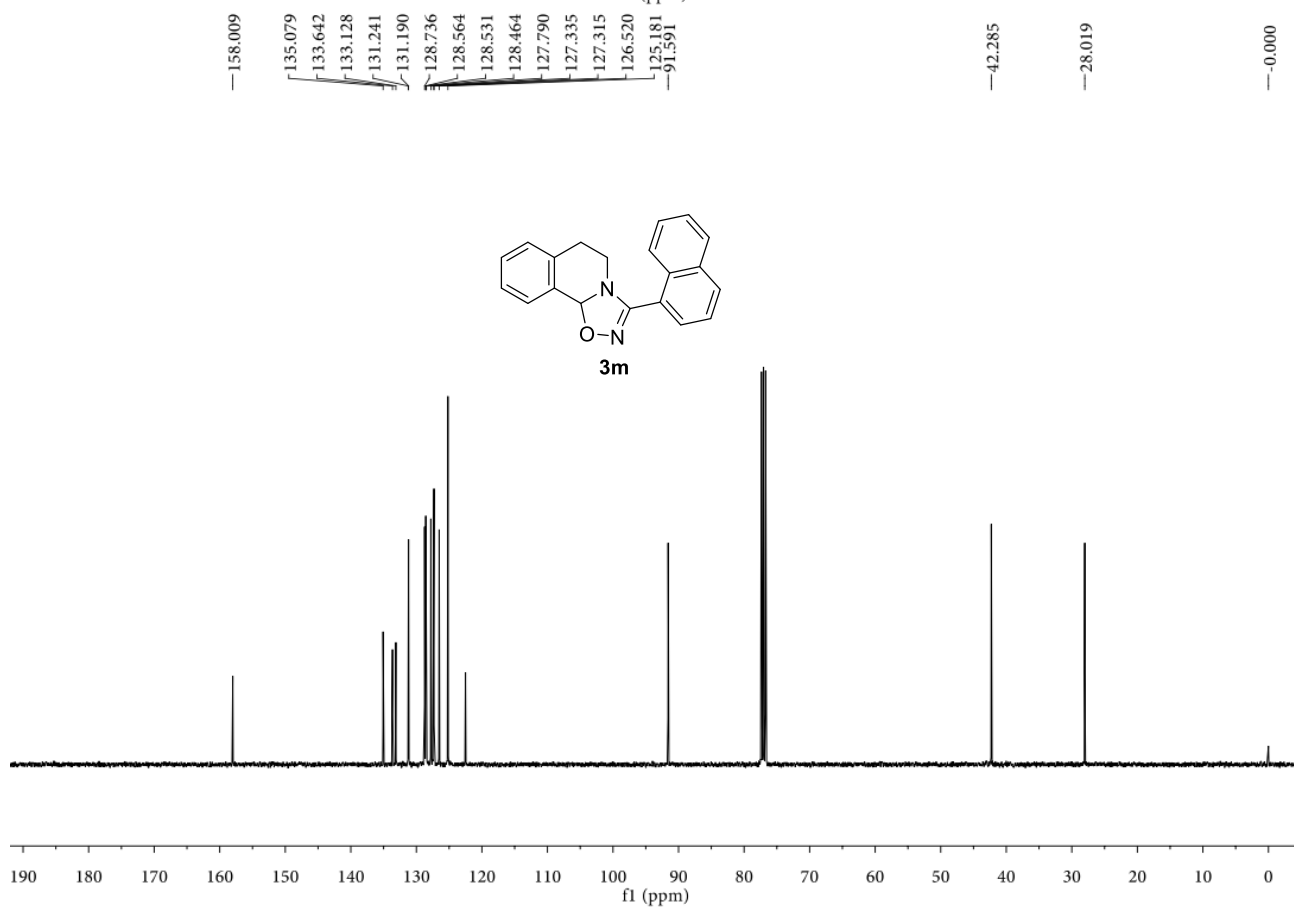

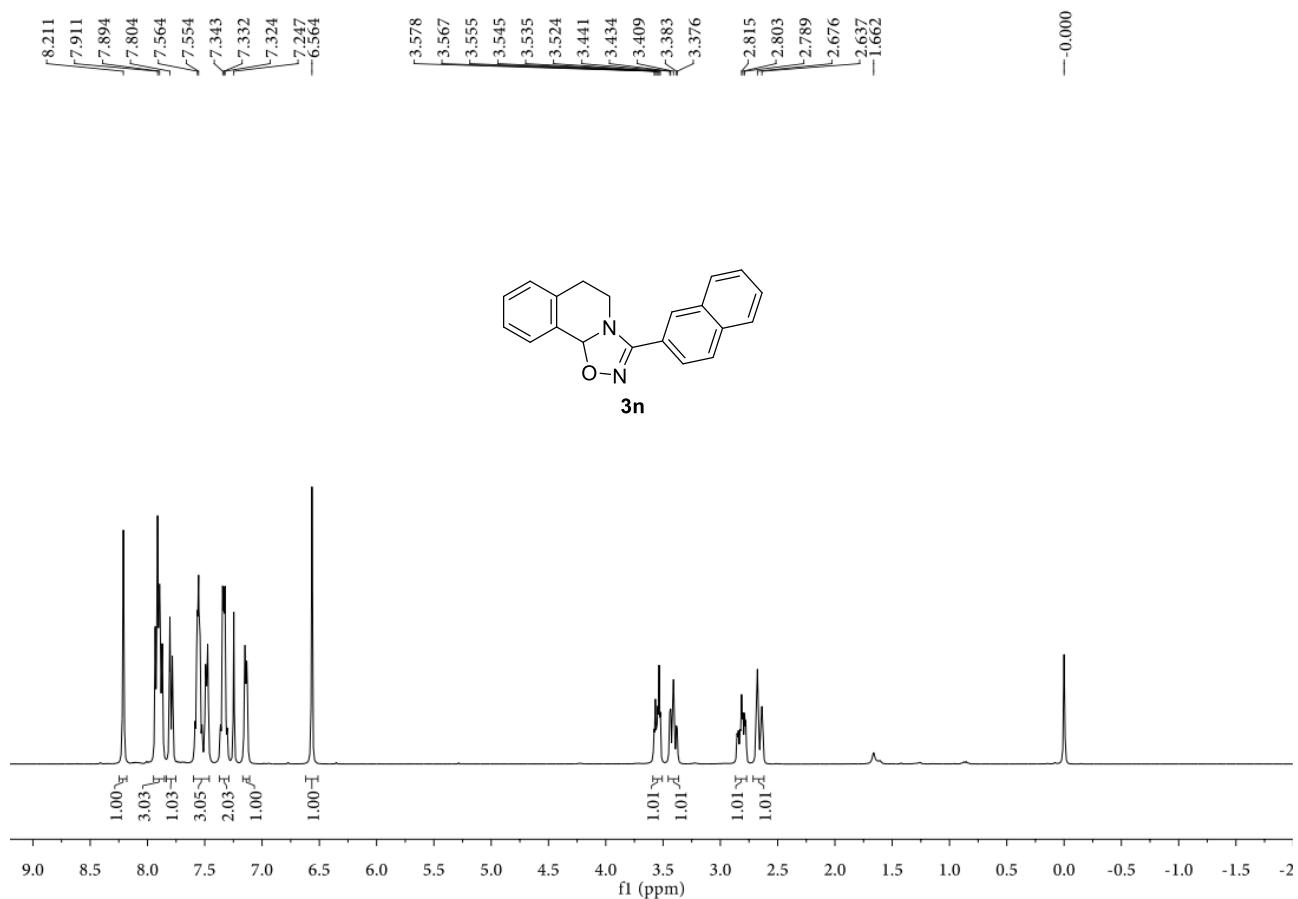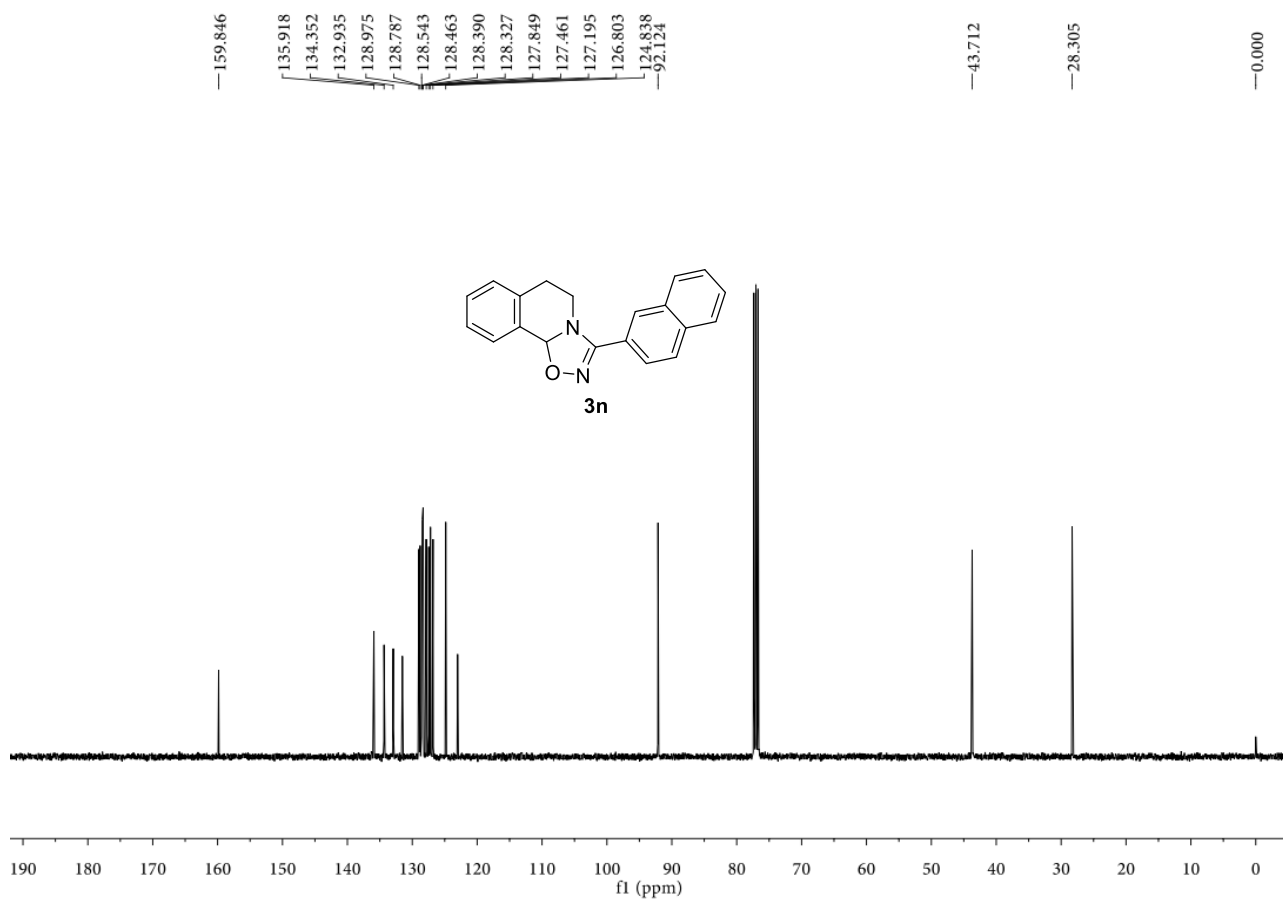



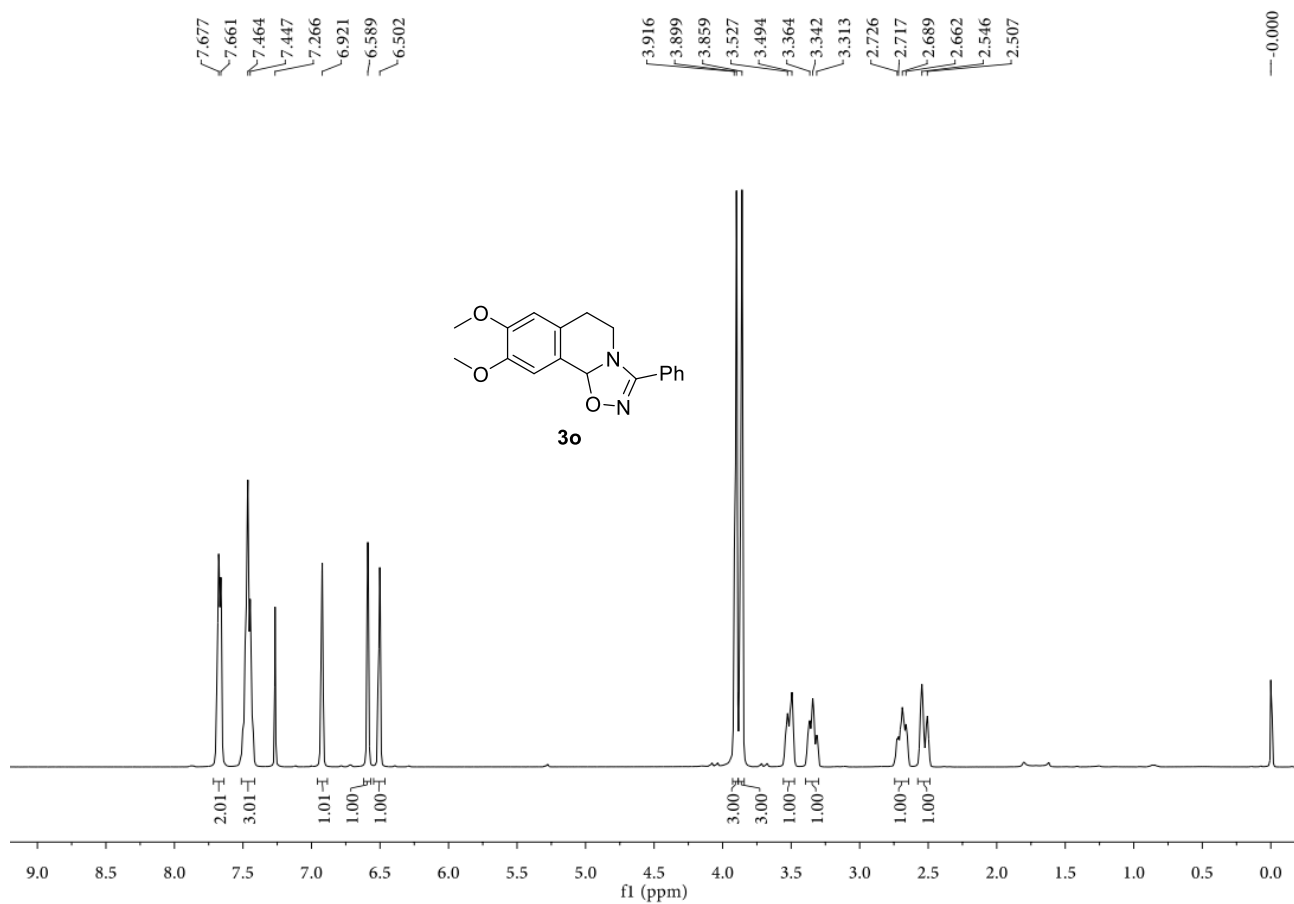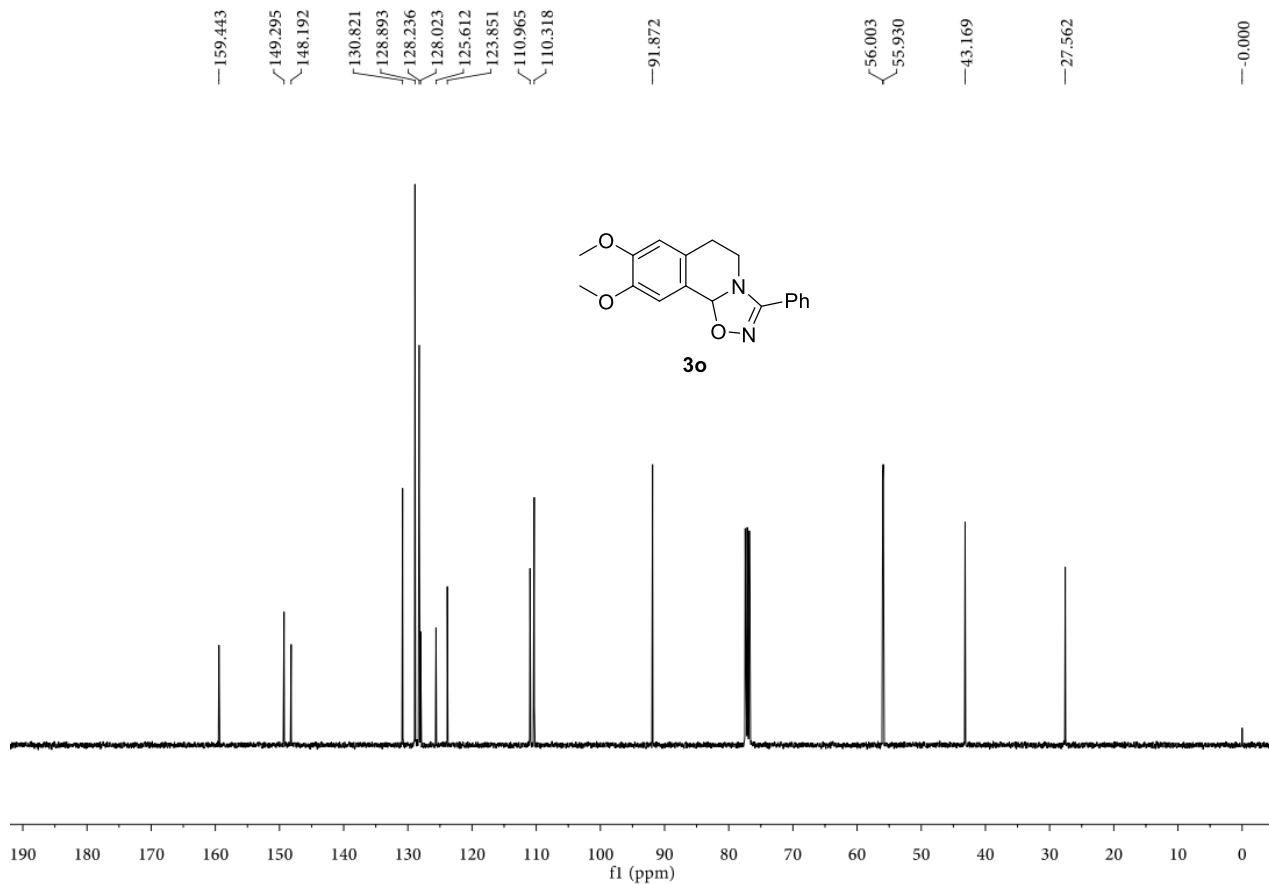

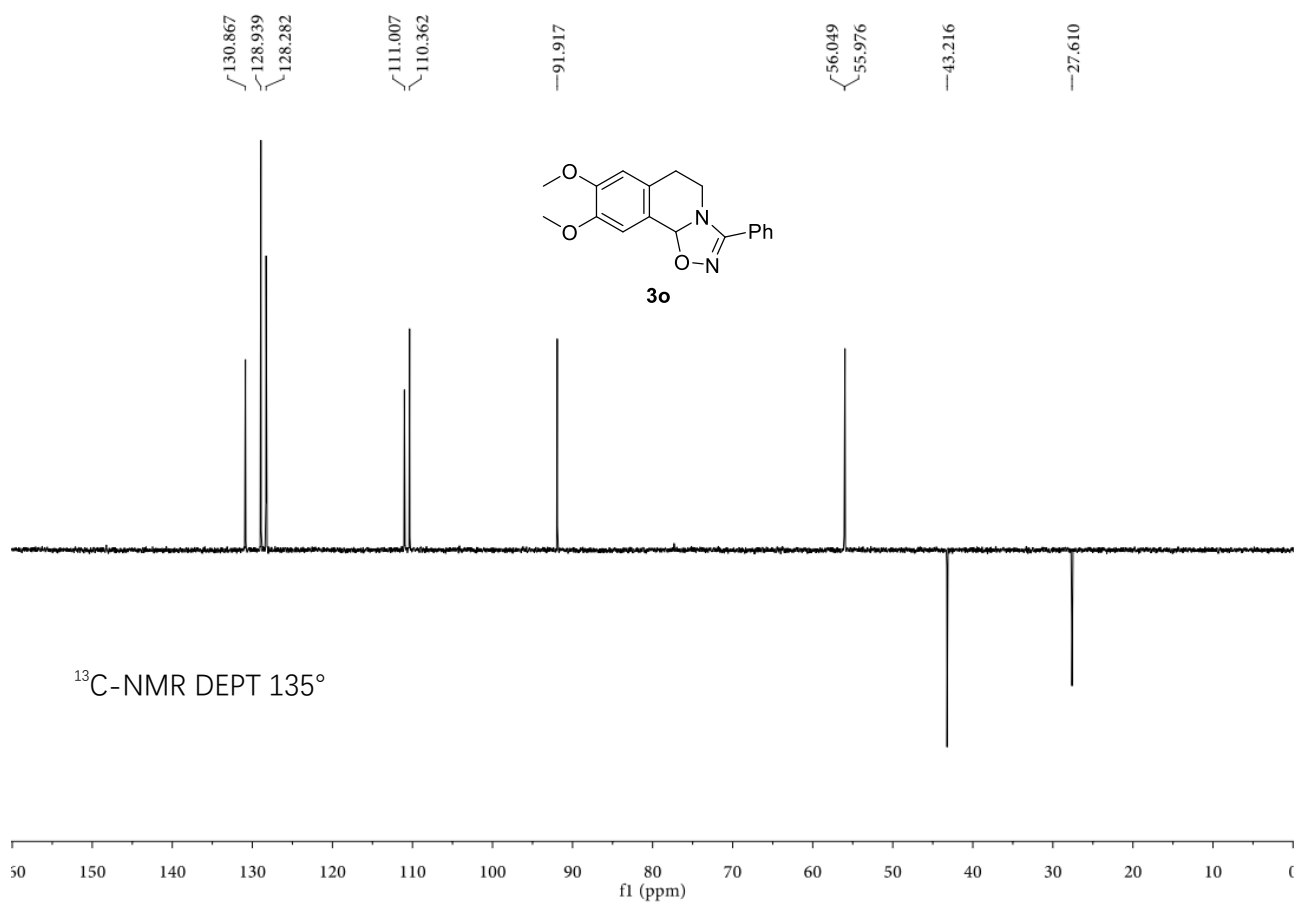

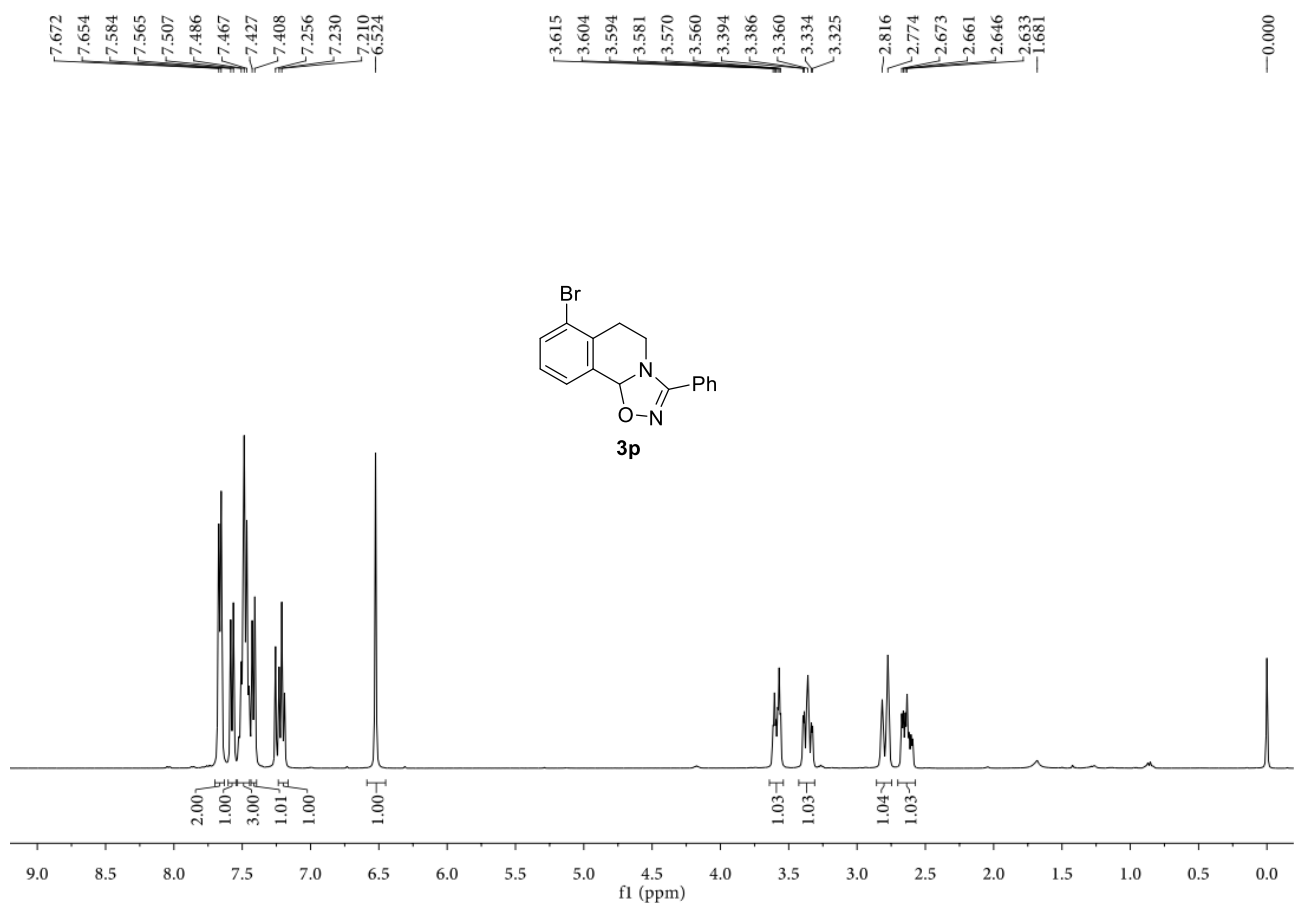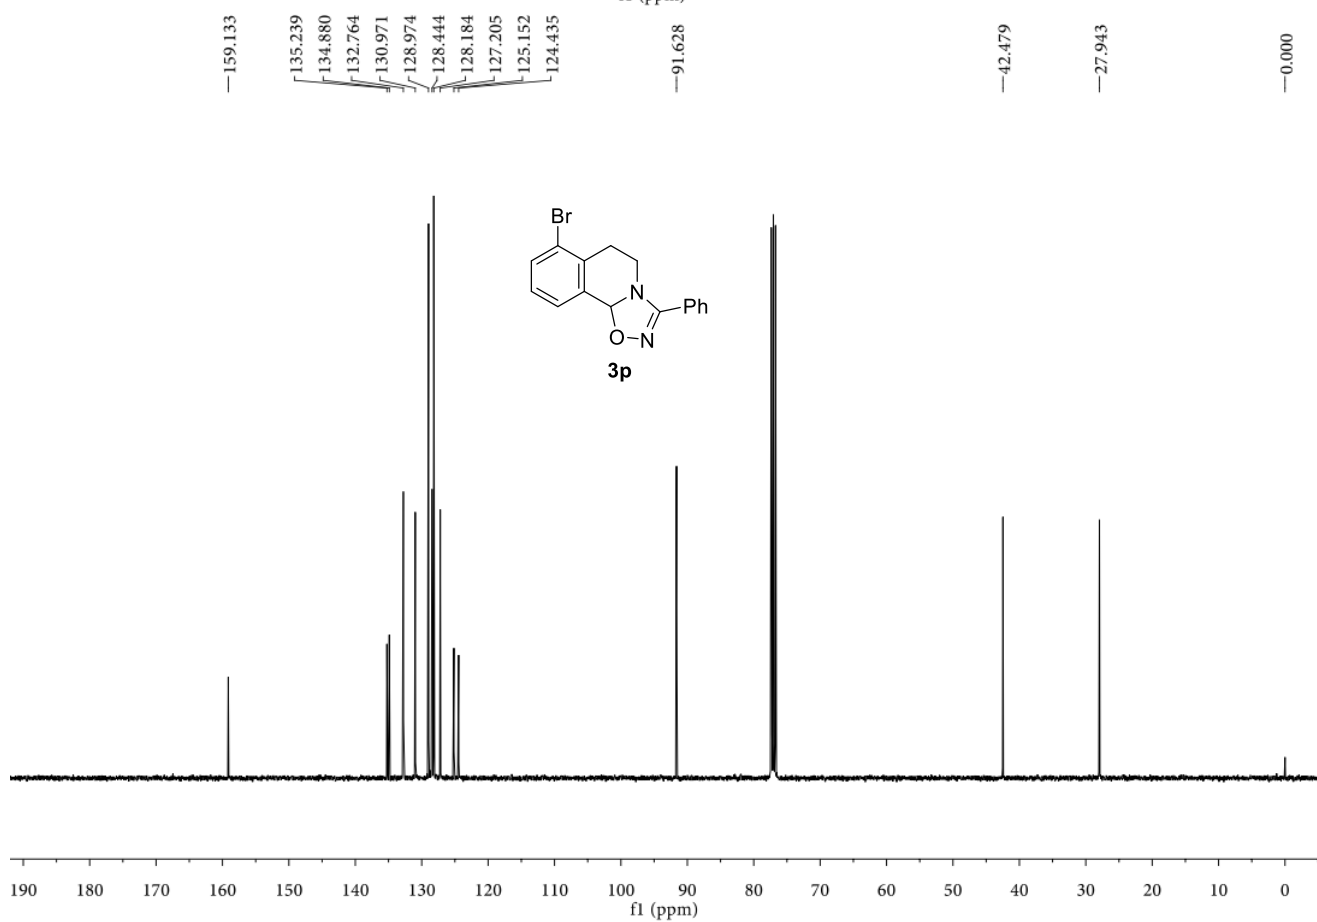

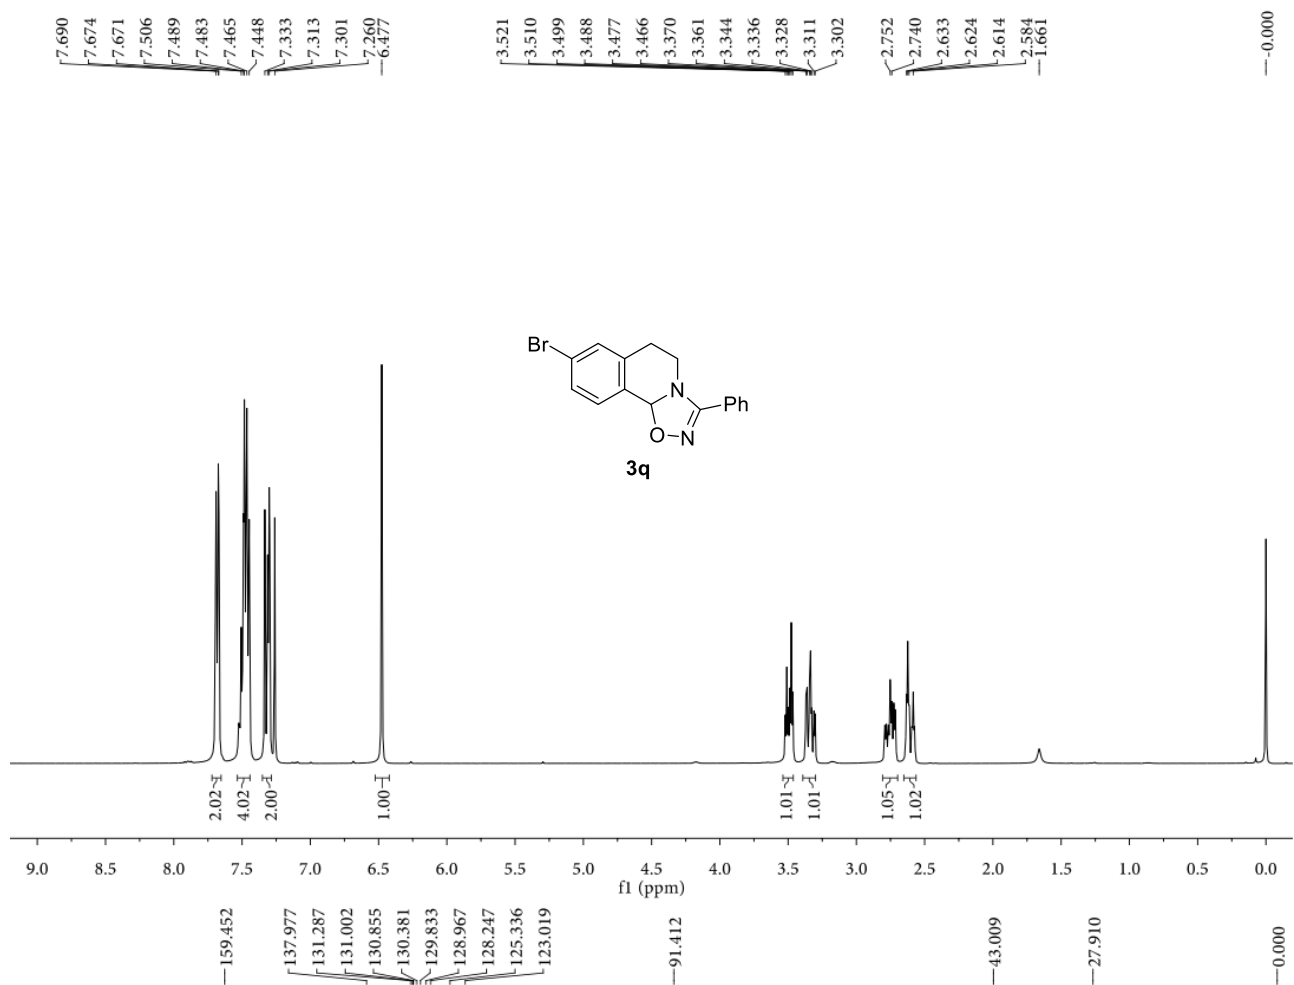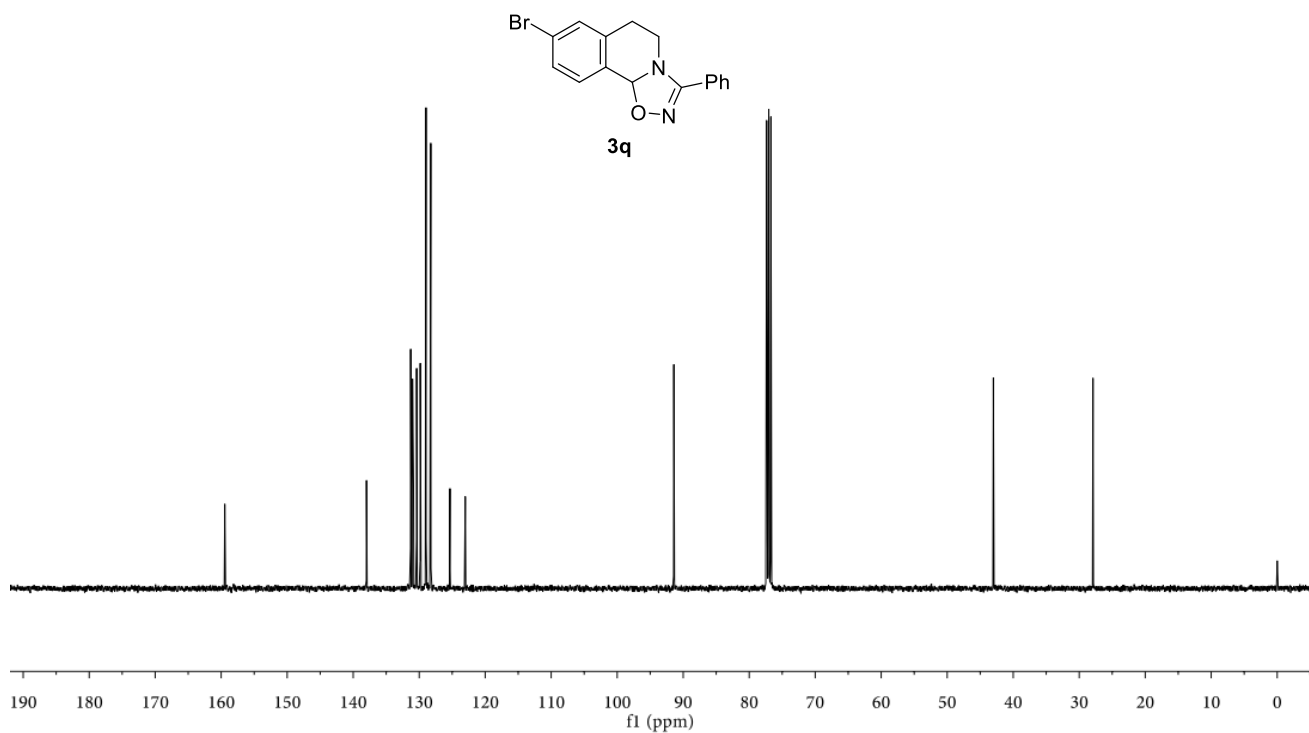

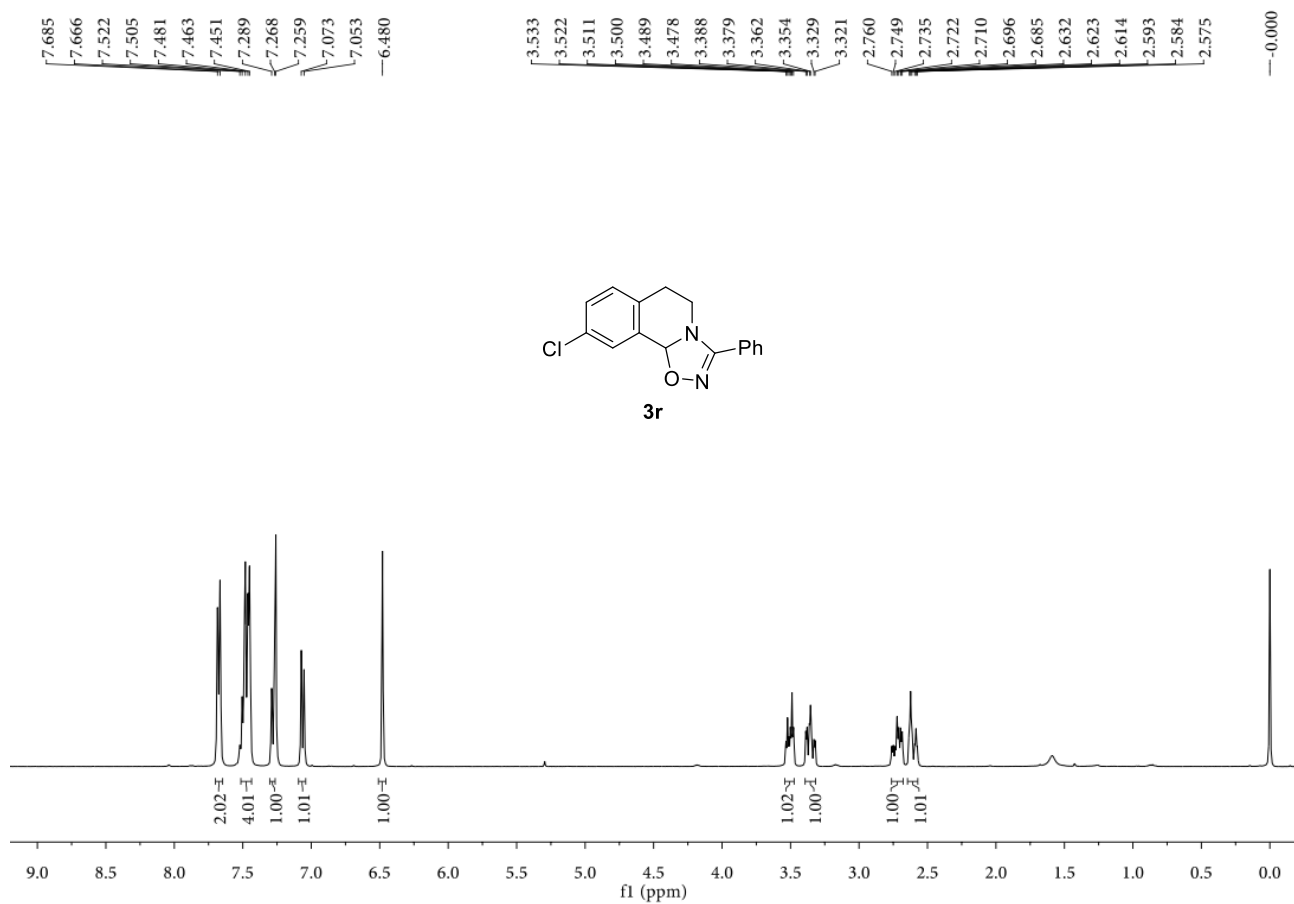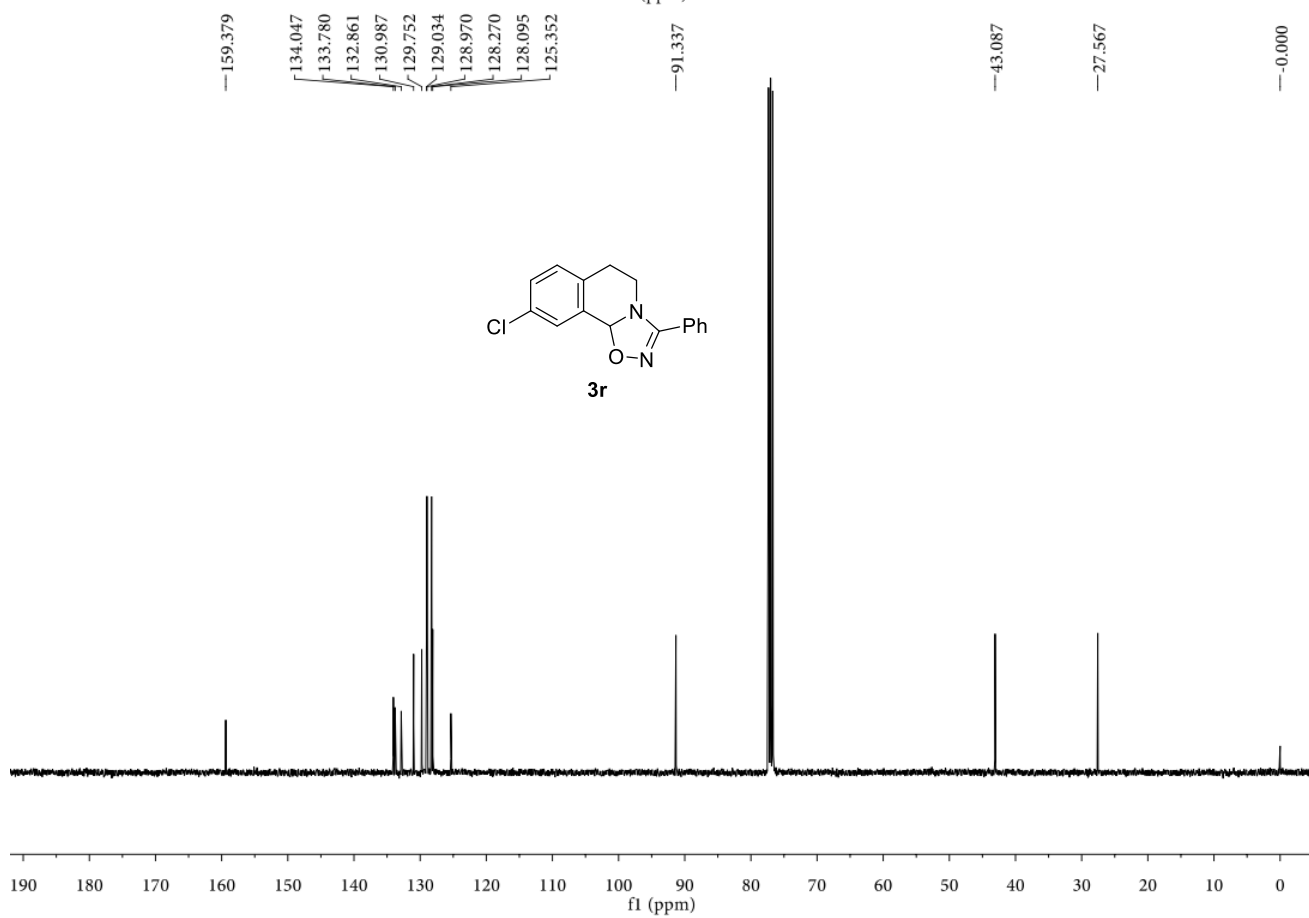

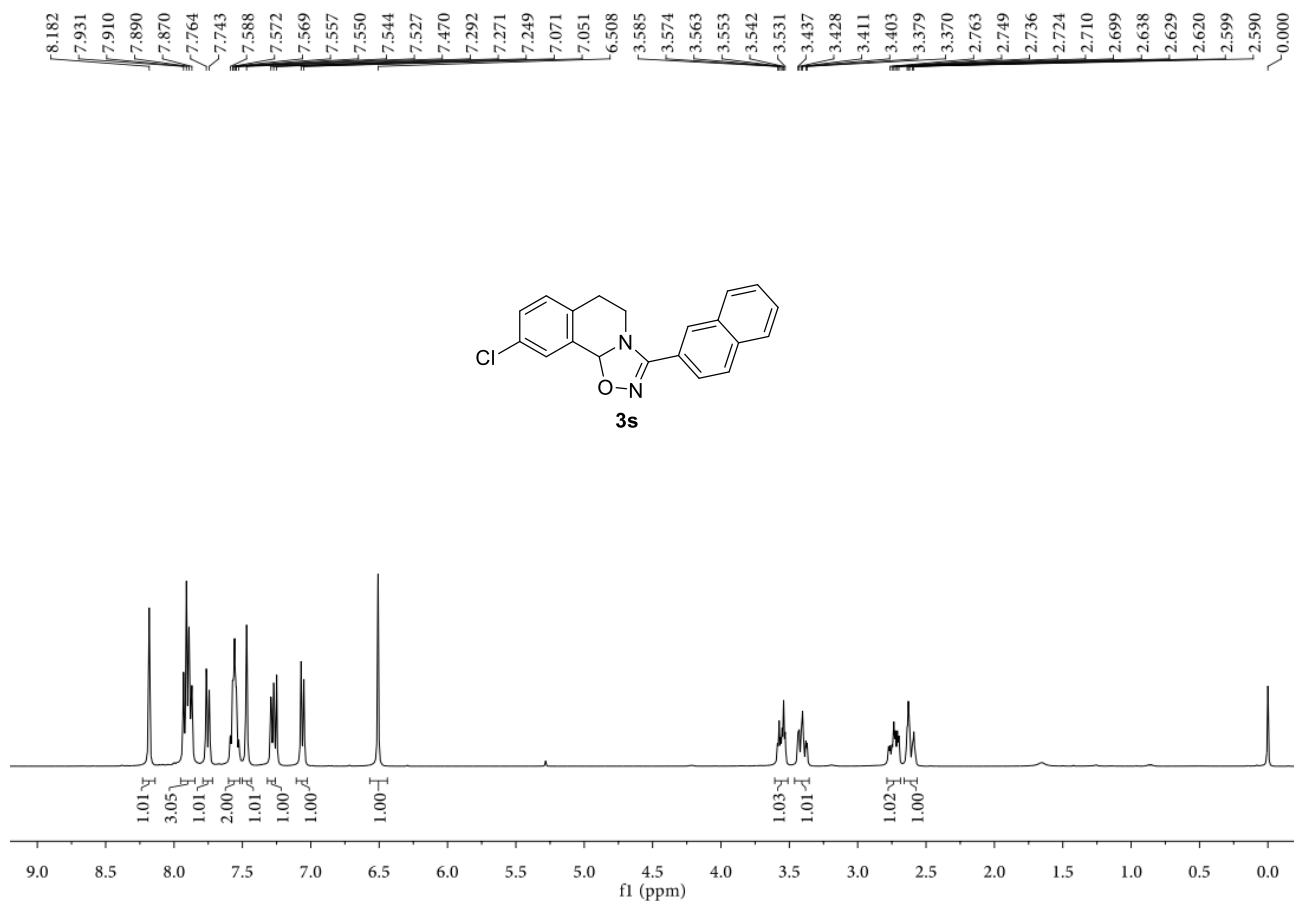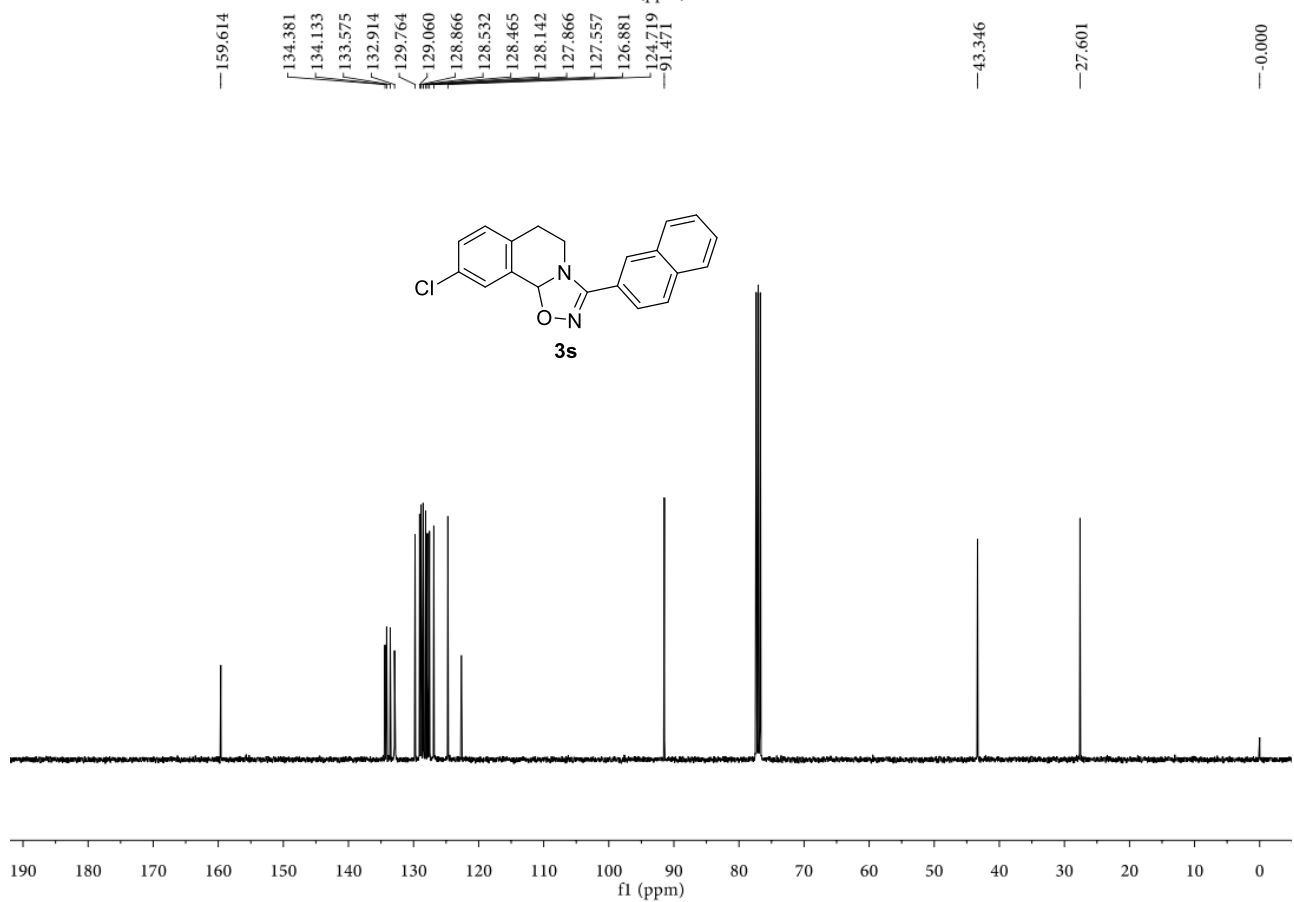

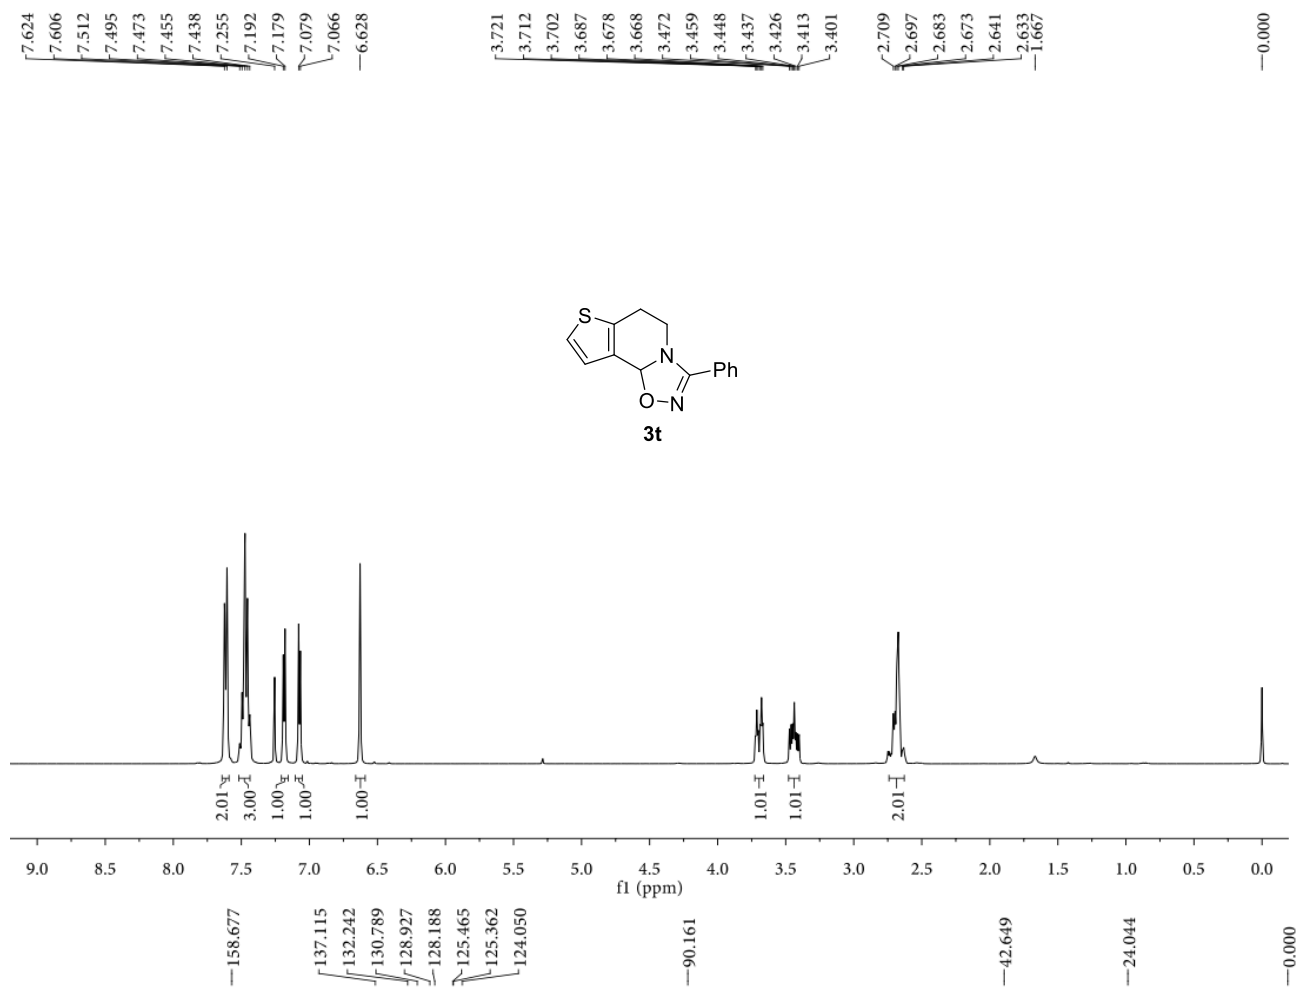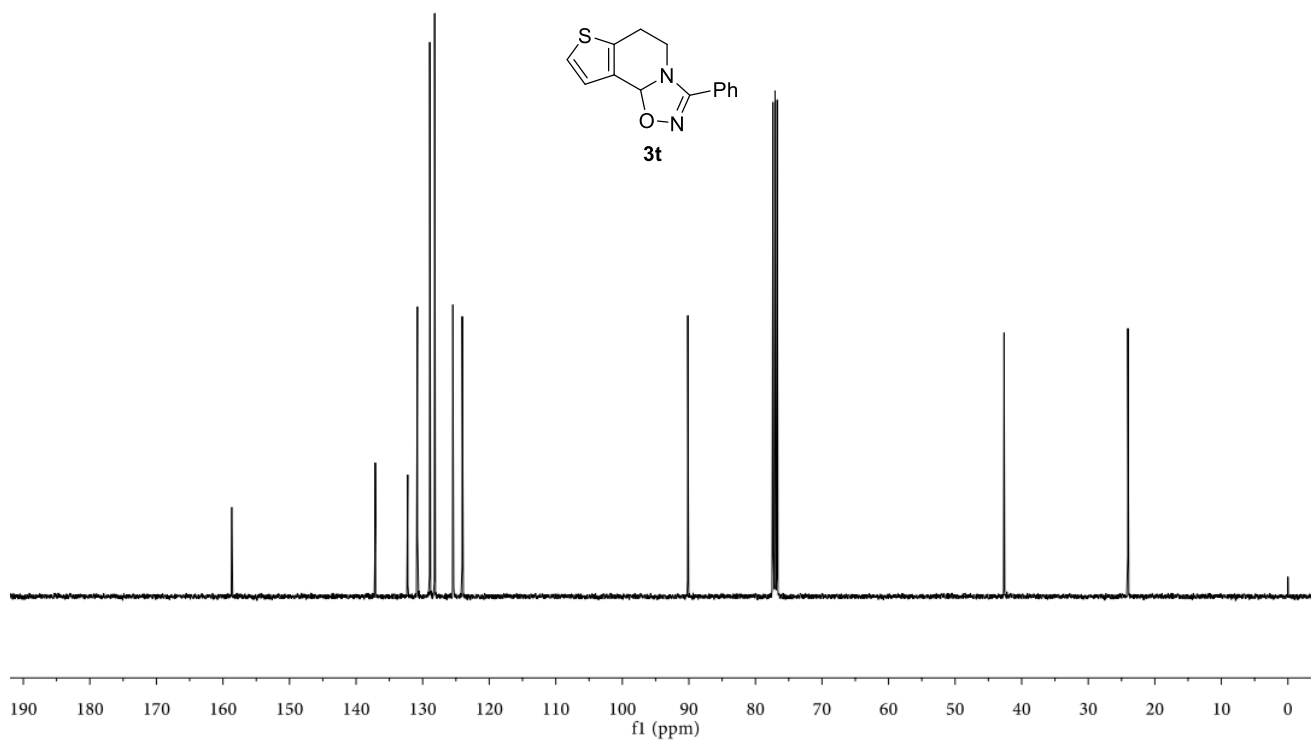

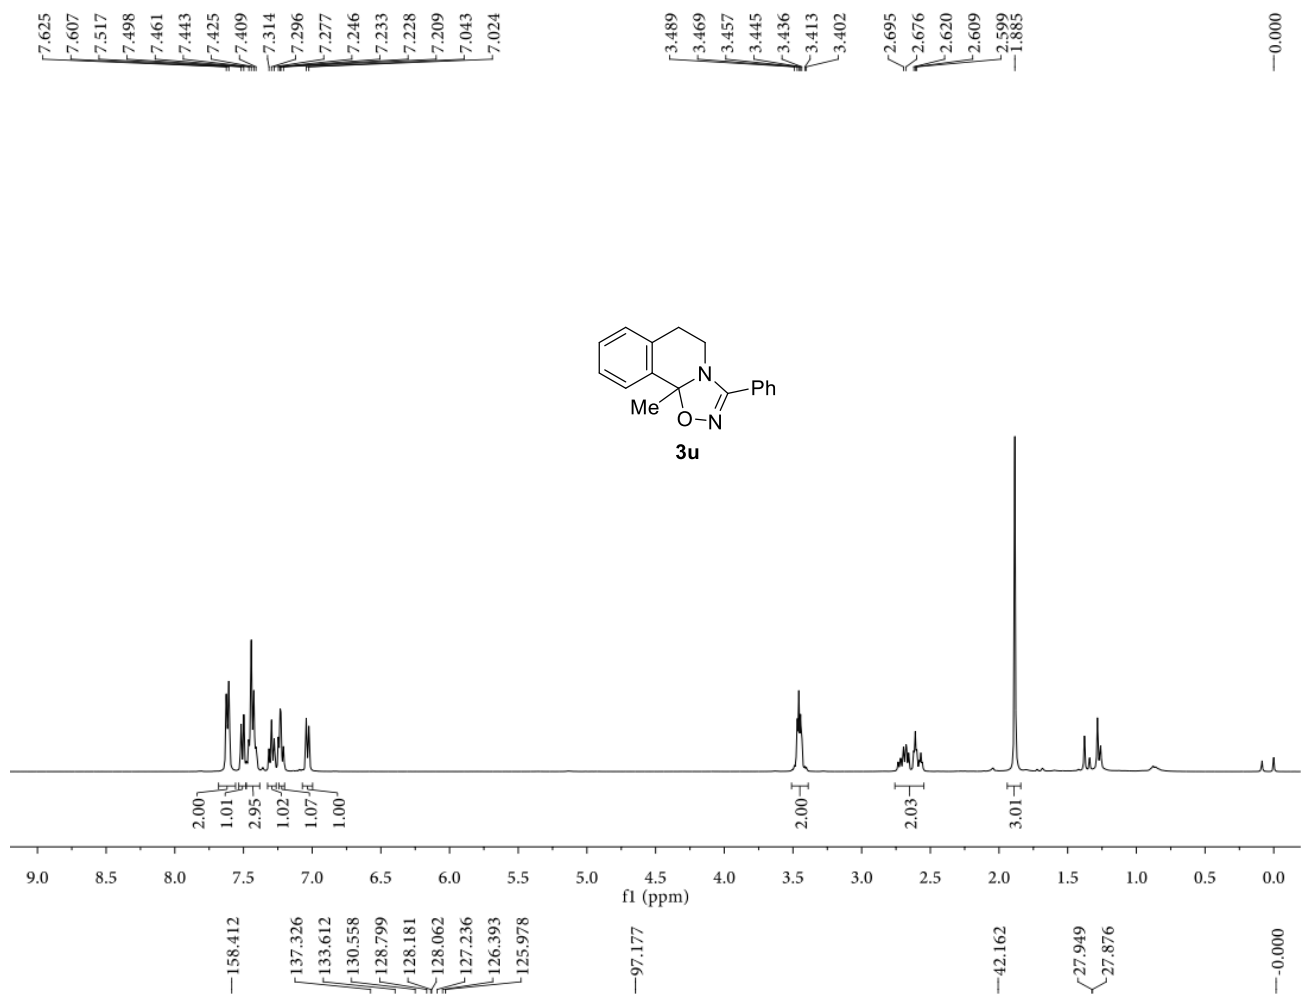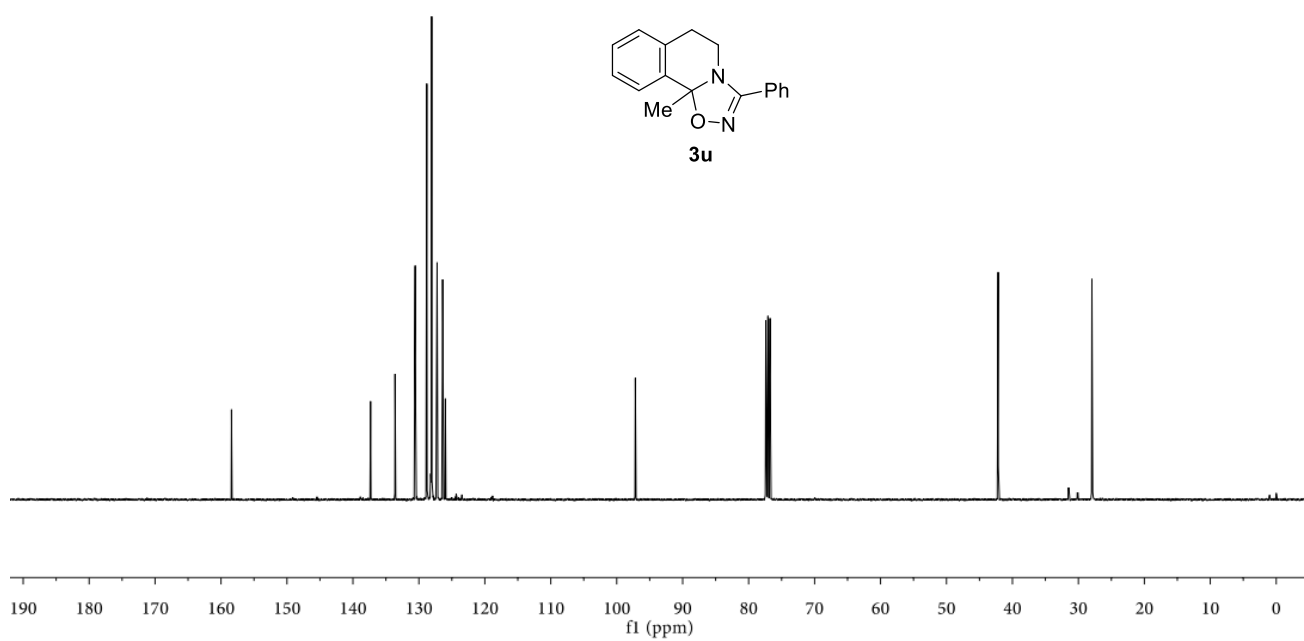



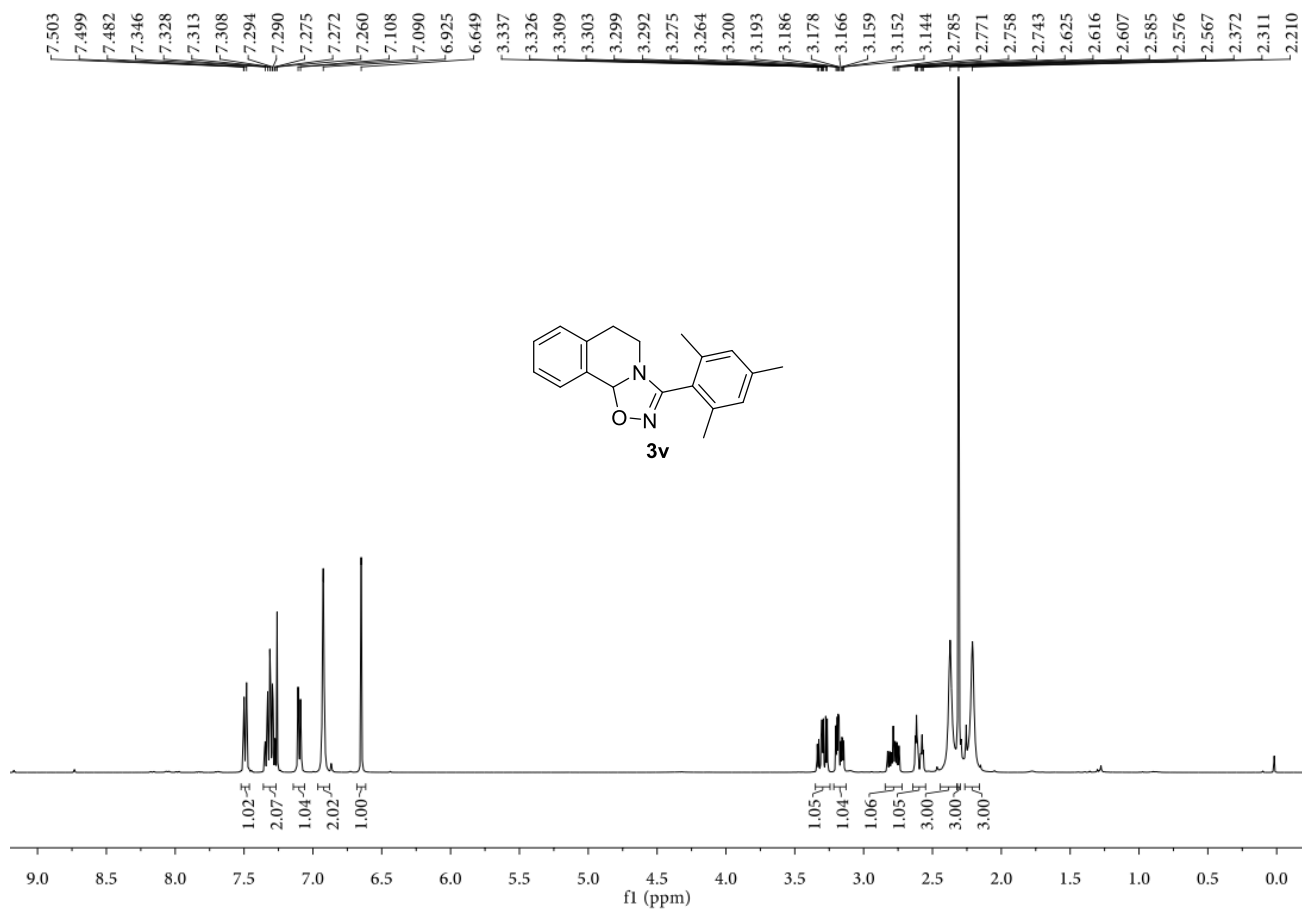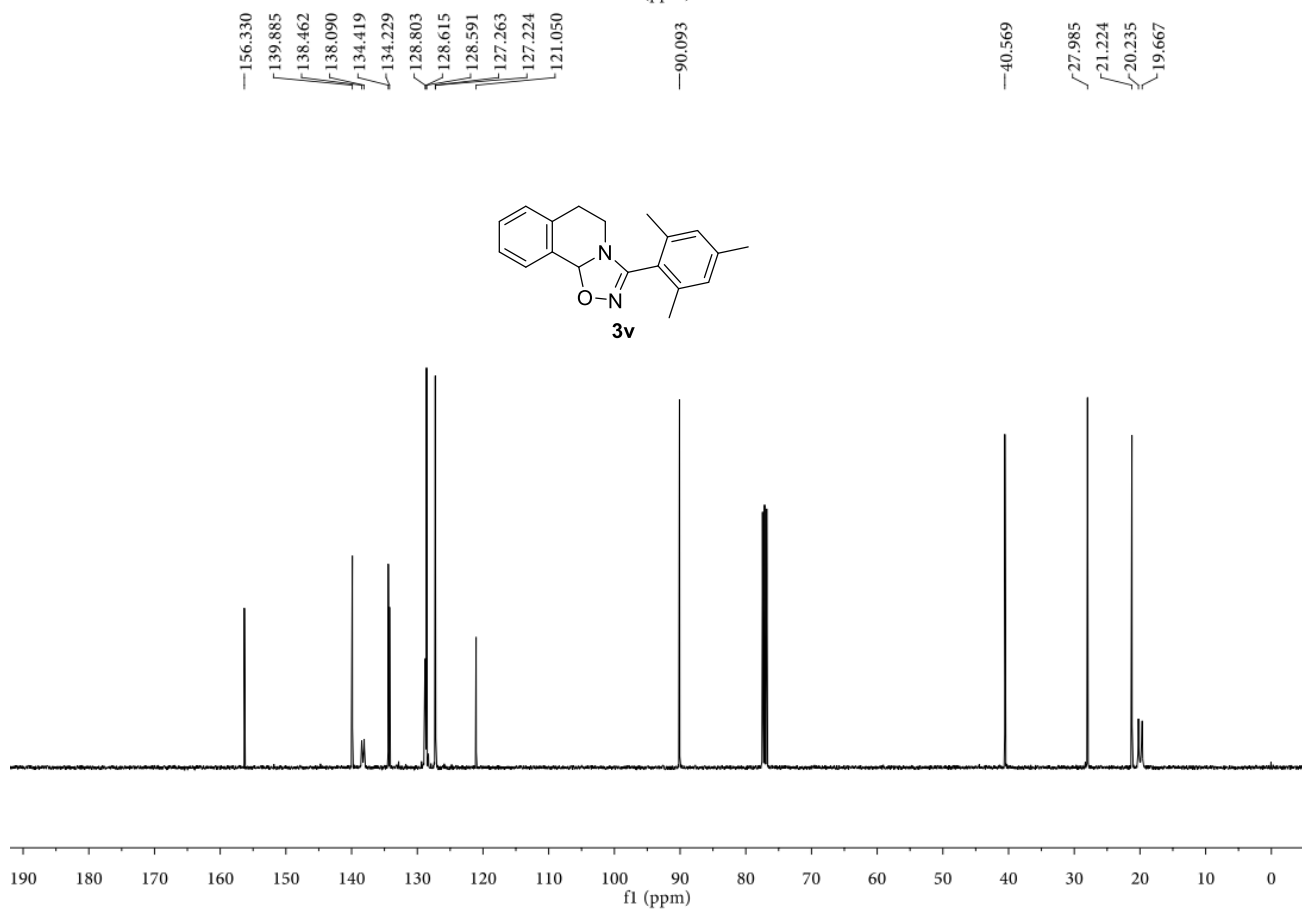

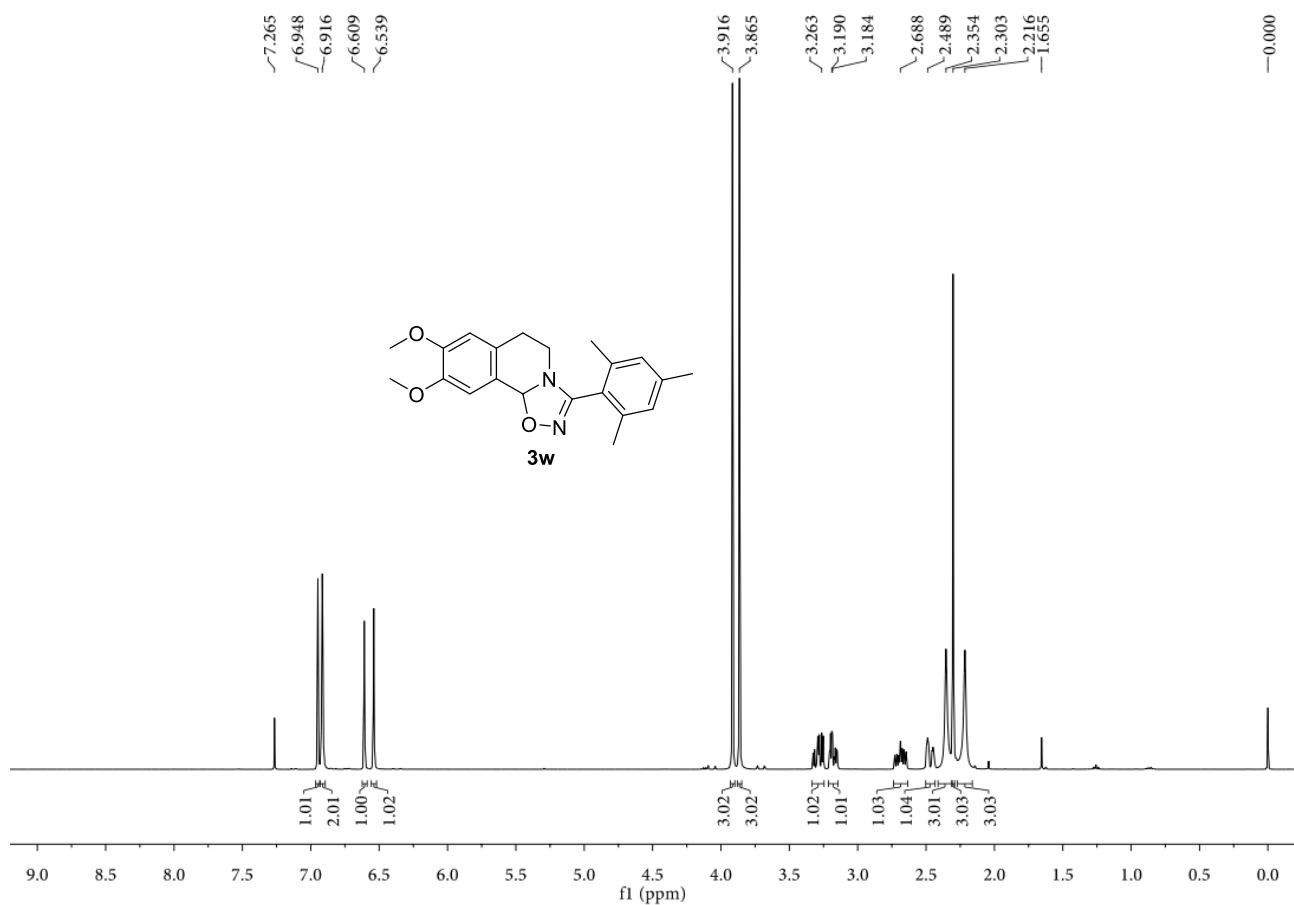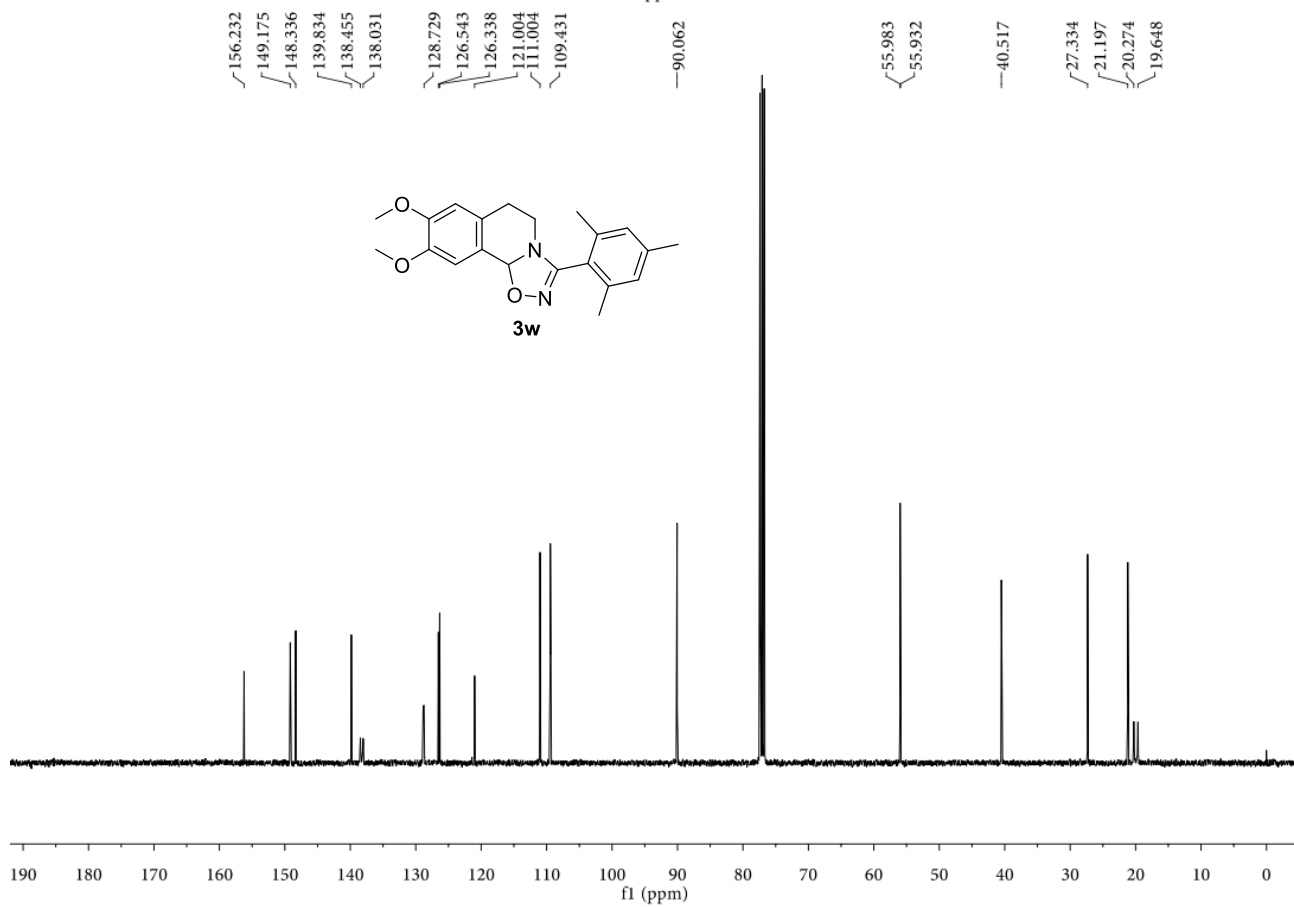

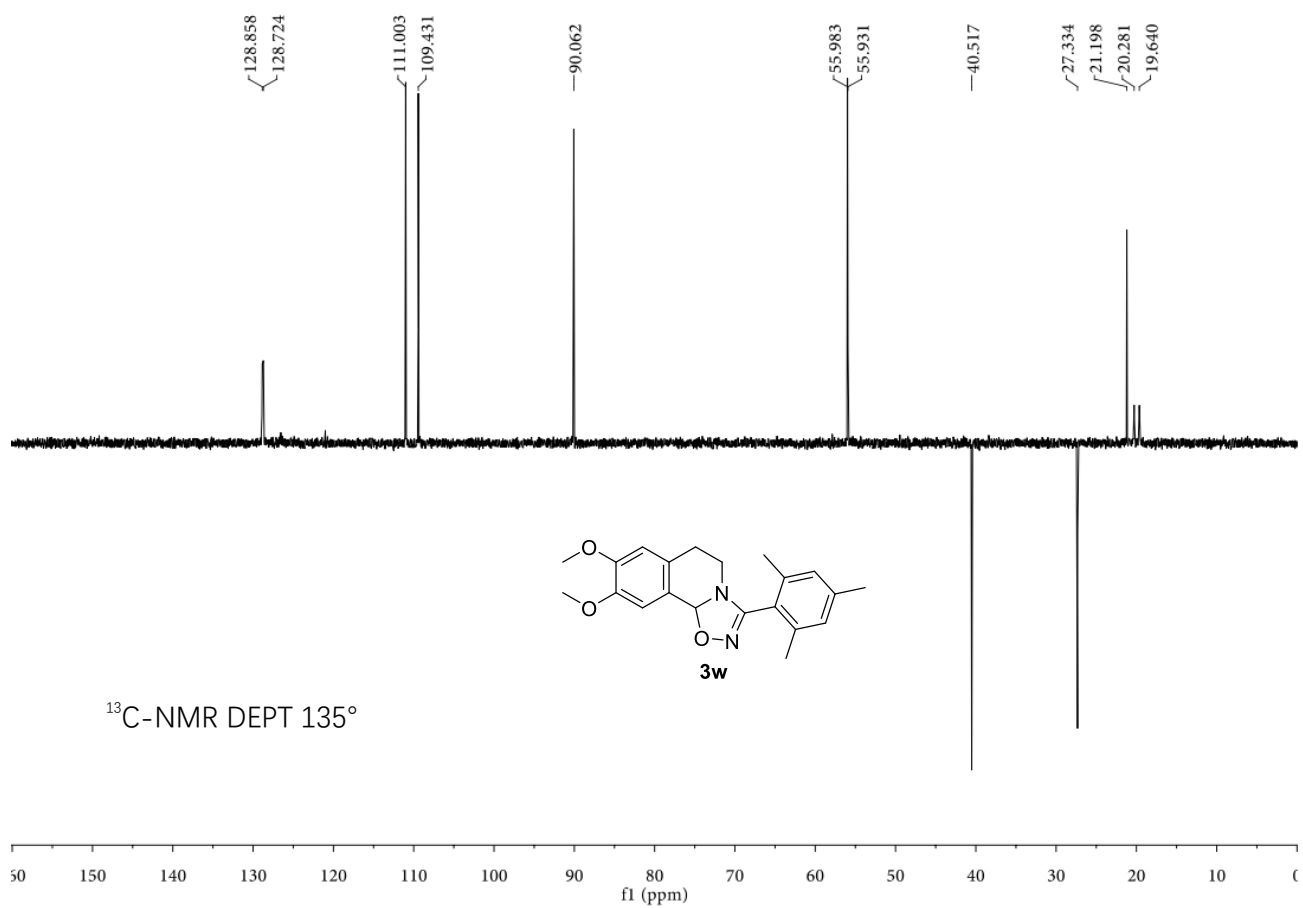

Supplement: s1 [file s1]
